# Supplementary material for: Unveiling the redox mechanism of cerium doped in nickel for alkaline hydrogen evolution: a theoretical exploration
Source: Royal Society of Chemistry journal article supplement (doi:10.1039/d4cp04528a), 2025-01-01
Supplement: d4cp04528a1.pdf [file d4cp04528a1.pdf]

## Supplementary Information

# Unveiling Redox Mechanism of Cerium Doped in Nickel for Alkaline Hydrogen Evolution: A Theoretical Exploration

*Jun Chen,<sup>1,2</sup> Panwang Zhou<sup>1,2,\*</sup>*

<sup>1</sup> State Key Laboratory of Catalysis, Dalian Institute of Chemical Physics, Chinese Academy of Sciences, Dalian 116023, China. E-mail: [pwzhou@dicp.ac.cn](mailto:pwzhou@dicp.ac.cn) (*P. Zhou*)

<sup>2</sup> University of Chinese Academy of Sciences, Beijing 100049, China;

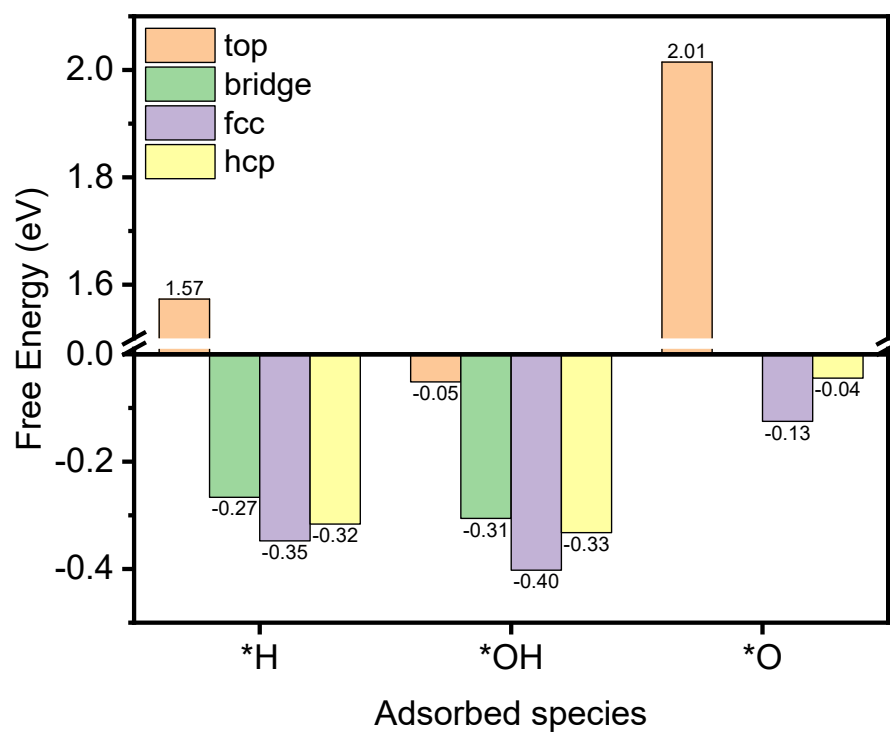

Fig S1. The Free energy of \*H, \*OH, and \*O on the surface of Ce@Ni.

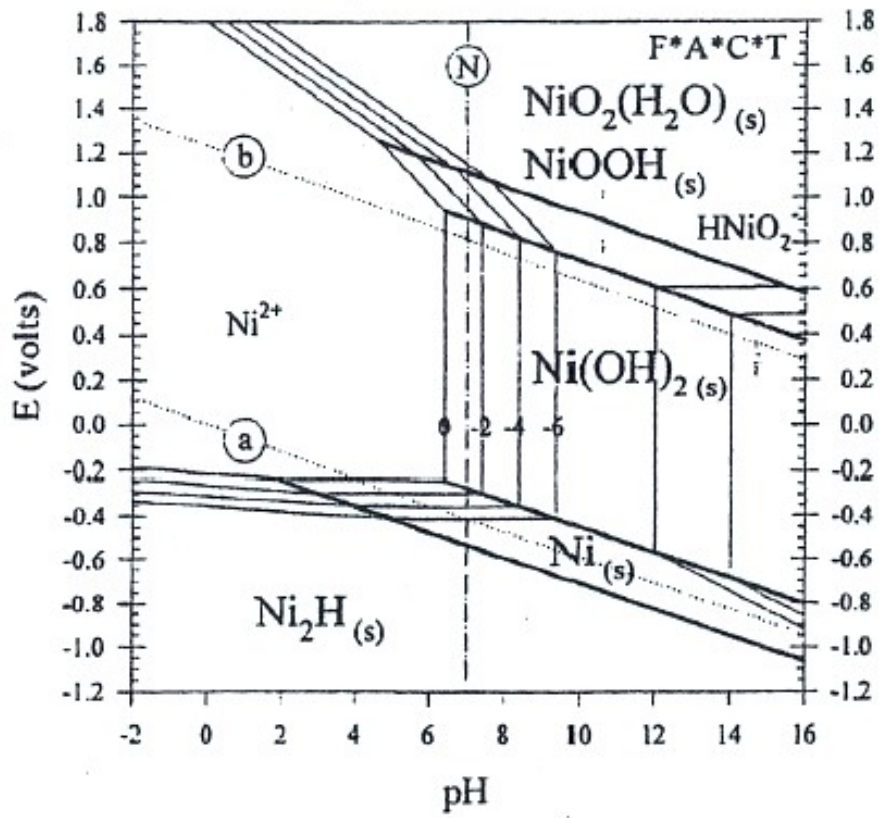

Fig S2. The Pourbaix Diagram for nickel (Ni) through experiment<sup>1</sup>.

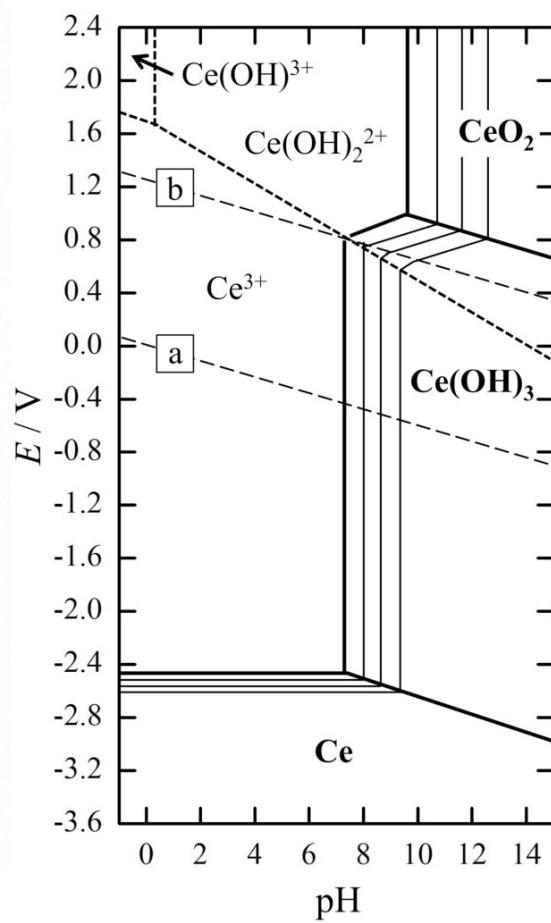

Fig S3. The Pourbaix Diagram for cerium (Ce) through experiment<sup>1,2</sup>.

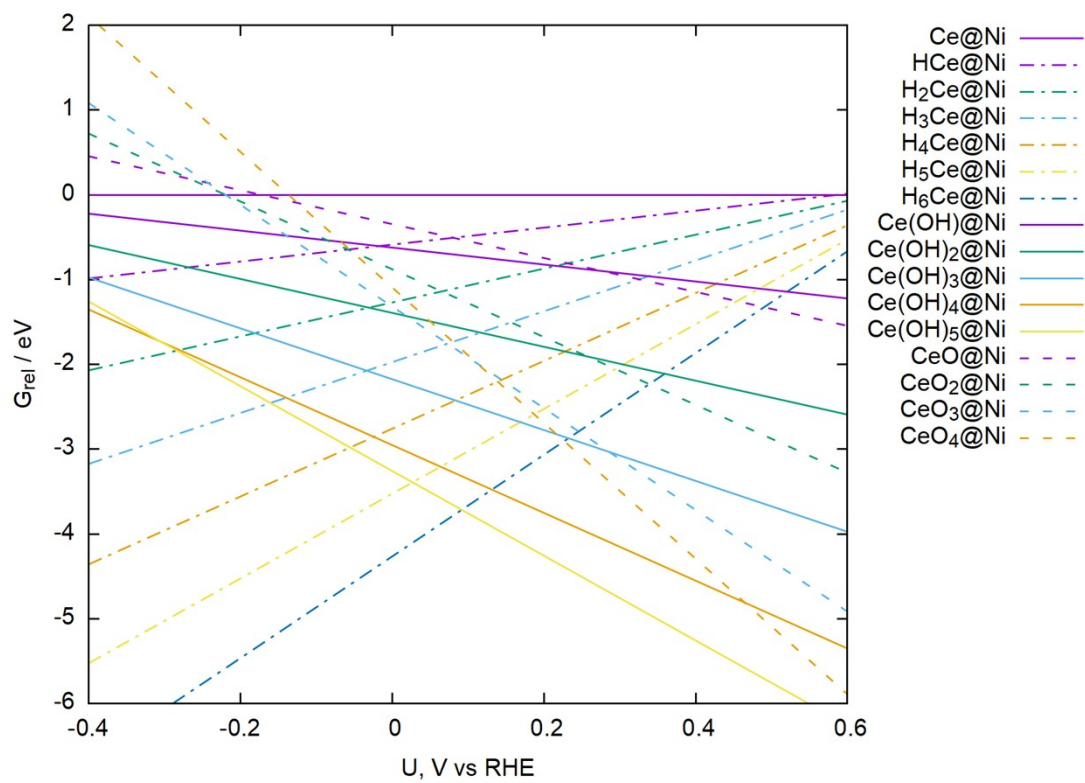

Fig S4. The Pourbaix diagram illustrating surface reactions of monodisperse Ce@Ni at pH = 0.

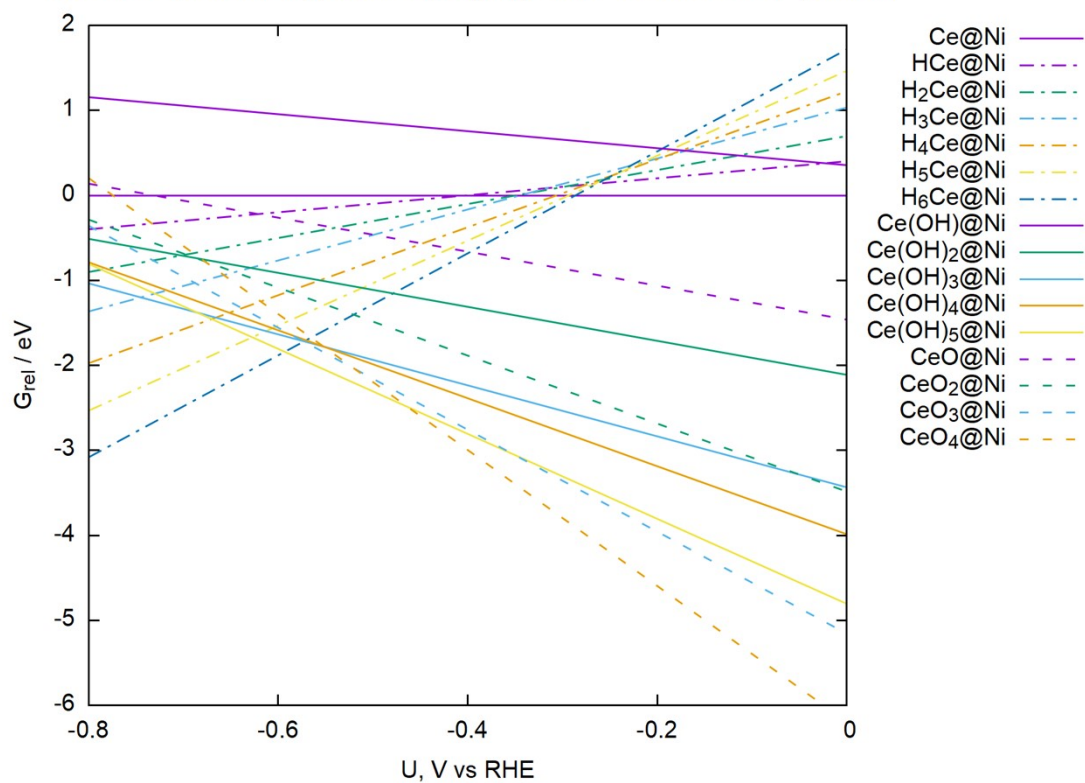

Fig S5. The Pourbaix diagram illustrating surface reactions of monodisperse Ce@Ni at pH = 14.

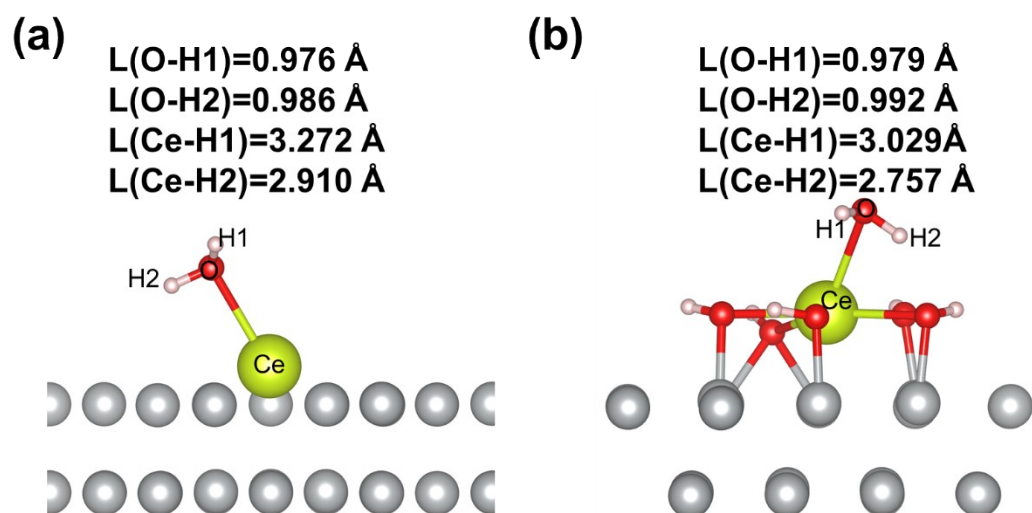

Fig S6. O-H bond length and Ce-H distance for adsorbed H<sub>2</sub>O on (a) Ce@Ni and (b) Ce(OH)<sub>5</sub>@Ni surfaces.

Table S1. The valence state and Bader charge of Ce in different clusters and crystals containing Ce.

|                                    | <b>Species</b> | <b>Valence states</b> | <b>Bader charge</b> |
|------------------------------------|----------------|-----------------------|---------------------|
| Ce                                 | Cluster        | 0                     | 0.000               |
| HCe                                | Cluster        | 1                     | 0.583               |
| CeO                                | Cluster        | 2                     | 1.103               |
| H <sub>2</sub> Ce                  | Cluster        | 2                     | 1.269               |
| Ce(OH) <sub>2</sub>                | Cluster        | 2                     | 1.369               |
| HCe(OH)                            | Cluster        | 2                     | 1.276               |
| H <sub>2</sub> Ce                  | Crystal        | 2                     | 1.510               |
| HCeO                               | Cluster        | 3                     | 1.681               |
| CeO(OH)                            | Cluster        | 3                     | 1.782               |
| H <sub>3</sub> Ce                  | Cluster        | 3                     | 1.852               |
| H <sub>3</sub> Ce                  | Crystal        | 3                     | 1.790               |
| H <sub>2</sub> Ce(OH)              | Cluster        | 3                     | 1.867               |
| CeO <sub>2</sub>                   | Cluster        | 4                     | 1.969               |
| HCe(OH) <sub>2</sub>               | Cluster        | 4                     | 1.984               |
| H <sub>3</sub> Ce(OH)              | Cluster        | 4                     | 2.043               |
| HCeO(OH)                           | Cluster        | 4                     | 2.095               |
| Ce(OH) <sub>3</sub>                | Cluster        | 3                     | 2.097               |
| Ce <sub>2</sub> O <sub>3</sub>     | Crystal        | 3                     | 2.030               |
| H <sub>2</sub> Ce(OH) <sub>2</sub> | Cluster        | 4                     | 2.159               |
| CeO(OH) <sub>2</sub>               | Cluster        | 4                     | 2.207               |
| Ce(OH) <sub>4</sub>                | Cluster        | 4                     | 2.369               |
| CeO <sub>2</sub>                   | Crystal        | 4                     | 2.450               |



Table S2. The calculated Bader charge of Ce in  $H_xCe@Ni$ ,  $CeO_y@Ni$ , and  $Ce(OH)_z@Ni$ .

| Species      | Bader charge |
|--------------|--------------|
| $HCe@Ni$     | 1.293        |
| $H_2Ce@Ni$   | 1.239        |
| $H_3Ce@Ni$   | 1.515        |
| $H_4Ce@Ni$   | 1.570        |
| $H_5Ce@Ni$   | 1.575        |
| $H_6Ce@Ni$   | 1.823        |
| $CeO@Ni$     | 1.556        |
| $CeO_2@Ni$   | 1.731        |
| $CeO_3@Ni$   | 2.085        |
| $CeO_4@Ni$   | 1.988        |
| $Ce(OH)@Ni$  | 1.460        |
| $Ce(OH)_2Ni$ | 1.911        |
| $Ce(OH)_3Ni$ | 2.086        |
| $Ce(OH)_4Ni$ | 2.058        |
| $Ce(OH)_5Ni$ | 2.034        |

## Calculation details

All the DFT calculations in this study were conducted using the Vienna Ab initio Simulation Package (VASP) code<sup>3–6</sup>. The ion core potentials were modeled following the projector augmented wave (PAW)<sup>7,8</sup> approach to describe the electron-core interaction. For electron exchange-correlation, the revised Perdew-Burke-Ernzerhof (RPBE) functional<sup>9</sup> within the generalized-gradient approximation (GGA) range was applied.<sup>10,11</sup> A plane wave basis set was used with a cutoff energy of 400 eV. Structural relaxations were performed until the forces on each of the atoms were below 0.02 eV Å<sup>-1</sup>. The Ni(111) and Ce-doped Ni(111) surfaces were modeled with a 4 × 4-unit cell. During structural optimization and the self-consistent calculations, Monkhorst–Pack mesh k-space sampling grids<sup>12</sup> of 3 × 3 × 1 were used to sample the Brillouin zone (BZ). The Ni(111) and Ce doped Ni(111) surfaces were modeled as a four-layer slab, with the bottom two layers frozen. A vacuum layer of 20 Å was added perpendicular to the slab surface. Dipole corrections were included in the surface normal direction<sup>13</sup>. Usually, the adatom or dopant cannot change the lattice structure of the Ni(111), but causes local distortions. Thus, while optimizing the structures, the lattice structure is kept stable, and the positions of atoms are optimized. Activation barriers were calculated using the climbing image–nudged elastic band method<sup>14</sup>. The TS was identified when the forces on all the atoms and the tangent force on the highest-

energy image were below 0.02 eV Å<sup>-1</sup>, and the tangent forces on the preceding images were opposite in sign to those on the images after the TS. The spin-polarization effect was considered in all cases. To better describe the dispersion interaction within water adsorption systems, vdW correction was considered by adopting the Grimme's D3 scheme<sup>15,16</sup>. To treat the strongly correlated f orbitals of lanthanide metal atoms, the GGA + U scheme is adopted to describe the Coulomb and exchange corrections. The difference of the correlation energy U and the exchange energy J of the f electrons of is set to 6.3 for Ce.

The free energies ( $\Delta G$ ) are calculated using the following equation<sup>17</sup>:

$$\Delta G = \Delta E + \Delta ZPE + \Delta U(0 \rightarrow T) - T\Delta S$$

Where,  $\Delta E$ ,  $\Delta ZPE$ ,  $\Delta U(0 \rightarrow T)$ , and  $T\Delta S$  are the adsorption energy of adsorbed species on the given unit cell, the differences corresponding to the zero-point energy, the difference of the correction to the thermal energy, and the differences corresponding to the entropy (at 298.15 K), respectively.  $\Delta ZPE$  could be derived after frequency calculation by the following equation<sup>18</sup>:

$$ZPE = \frac{1}{2} \sum hv_i$$

Where  $h$  is the Planck constant,  $v_i$  are the computed vibrational frequencies.

The thermal energy correction is calculated by the following equation:

$$U(0 \rightarrow T) = \sum \frac{hv_i}{\exp(\beta hv_i) - 1}$$

The  $TS$  values of adsorbed species are calculated in the following equation<sup>17,19,20</sup>.

$$TS^{vib}(T, v) = \sum kT \left( \frac{\beta hv_i}{\exp(\beta hv_i) - 1} - \ln(1 - \exp(-\beta hv_i)) \right)$$

Where  $\beta = 1/kT$ ,  $\{v_i\}$  are vibrational modes,  $k$  is the Boltzmann constant, and  $T$  is the temperature (which is set to 298 K in the present work), respectively. In the present study, the Gibbs free energy is calculated using VASPKIT<sup>21</sup>, and the frequencies below 50  $\text{cm}^{-1}$  are approximately equal to 50  $\text{cm}^{-1}$  during the calculations of the vibration contributions to the adsorbed molecular free energy correction.

Contributions from rotational and translational degrees of freedom of  $\text{H}_2$  and  $\text{H}_2\text{O}$  molecules were also included in the ideal gas approximation at pressures of  $P(\text{H}_2) = 101325 \text{ Pa}$  and  $P(\text{H}_2\text{O}) = 3,534 \text{ Pa}$  in the Gibbs energy calculations. The former pressure is derived from the definition of the reversible hydrogen electrode potential, and the latter value is the vapor pressure of water at room temperature. At this pressure, the Gibbs energies of water molecules in the gas and liquid phases are equal, allowing us to estimate the Gibbs energies of liquid water molecules involved in the electrochemical reactions. The post-processing of VASP calculated data used VASPKIT<sup>21</sup> and qvasp<sup>22</sup> code.

## Optimized structures

(IS: Initial state; TS: Transition state;FS: Final state; HM: The \*H adsorbed at the M site.)

Ce@Ni

1.0

|               |              |               |
|---------------|--------------|---------------|
| 9.9672002792  | 0.0000000000 | 0.0000000000  |
| -4.9836001396 | 8.6318486464 | 0.0000000000  |
| 0.0000000000  | 0.0000000000 | 26.1037006378 |

Ni Ce

63 1

Direct

|             |             |             |
|-------------|-------------|-------------|
| 0.000000000 | 0.000000000 | 0.000000000 |
| 0.000000000 | 0.250000000 | 0.000000000 |
| 0.000000000 | 0.500000000 | 0.000000000 |
| 0.000000000 | 0.750000000 | 0.000000000 |
| 0.250000000 | 0.000000000 | 0.000000000 |
| 0.250000000 | 0.250000000 | 0.000000000 |
| 0.250000000 | 0.500000000 | 0.000000000 |
| 0.250000000 | 0.750000000 | 0.000000000 |
| 0.500000000 | 0.000000000 | 0.000000000 |
| 0.500000000 | 0.250000000 | 0.000000000 |
| 0.500000000 | 0.500000000 | 0.000000000 |
| 0.500000000 | 0.750000000 | 0.000000000 |
| 0.750000000 | 0.000000000 | 0.000000000 |
| 0.750000000 | 0.250000000 | 0.000000000 |
| 0.750000000 | 0.500000000 | 0.000000000 |
| 0.750000000 | 0.750000000 | 0.000000000 |
| 0.166667506 | 0.083332501 | 0.077940002 |

|             |             |             |
|-------------|-------------|-------------|
| 0.166667506 | 0.333332509 | 0.077940002 |
| 0.166667506 | 0.583332479 | 0.077940002 |
| 0.166667506 | 0.833332479 | 0.077940002 |
| 0.416667491 | 0.083332501 | 0.077940002 |
| 0.416667491 | 0.333332509 | 0.077940002 |
| 0.416667491 | 0.583332479 | 0.077940002 |
| 0.416667491 | 0.833332479 | 0.077940002 |
| 0.666667521 | 0.083332501 | 0.077940002 |
| 0.666667521 | 0.333332509 | 0.077940002 |
| 0.666667521 | 0.583332479 | 0.077940002 |
| 0.666667521 | 0.833332479 | 0.077940002 |
| 0.916667521 | 0.083332501 | 0.077940002 |
| 0.916667521 | 0.333332509 | 0.077940002 |
| 0.916667521 | 0.583332479 | 0.077940002 |
| 0.916667521 | 0.833332479 | 0.077940002 |
| 0.082747161 | 0.167090267 | 0.153983399 |
| 0.082754031 | 0.415772438 | 0.153991789 |
| 0.083223529 | 0.666503370 | 0.154642522 |
| 0.083288267 | 0.916729093 | 0.154618293 |
| 0.333744884 | 0.167559206 | 0.153926566 |
| 0.335470974 | 0.417746782 | 0.155736312 |
| 0.333788097 | 0.666258156 | 0.153917164 |
| 0.333401263 | 0.916688800 | 0.154638365 |
| 0.584252536 | 0.167051002 | 0.153979778 |
| 0.582257688 | 0.417713046 | 0.155764371 |
| 0.582278311 | 0.664541066 | 0.155782029 |
| 0.584265411 | 0.917258978 | 0.153975204 |
| 0.833334029 | 0.166776150 | 0.154734299 |
| 0.832997203 | 0.415763527 | 0.153974757 |
| 0.832401633 | 0.666235447 | 0.153906286 |

|             |             |             |
|-------------|-------------|-------------|
| 0.832957983 | 0.917240560 | 0.153970495 |
| 0.249780297 | 0.999591589 | 0.231756240 |
| 0.246596560 | 0.244575173 | 0.230322599 |
| 0.246606797 | 0.502150893 | 0.230309740 |
| 0.249664202 | 0.750282764 | 0.231768414 |
| 0.500506580 | 0.000311701 | 0.232238710 |
| 0.497873485 | 0.244556293 | 0.230333909 |
| 0.497903585 | 0.753512621 | 0.230338961 |
| 0.749429405 | 0.998914301 | 0.231607124 |
| 0.749346614 | 0.250718802 | 0.231664971 |
| 0.755509794 | 0.502190590 | 0.230298519 |
| 0.755563319 | 0.753576040 | 0.230359927 |
| 0.999742568 | 0.000259217 | 0.232230499 |
| 0.001230556 | 0.250620574 | 0.231678322 |
| 0.999657691 | 0.499368191 | 0.232280761 |
| 0.000424936 | 0.750239611 | 0.231761694 |
| 0.500131309 | 0.500117064 | 0.277487397 |

HCe@Ni

1.0

|               |              |               |
|---------------|--------------|---------------|
| 10.0322999954 | 0.0000000000 | 0.0000000000  |
| -5.0161499977 | 8.6882266544 | 0.0000000000  |
| 0.0000000000  | 0.0000000000 | 21.1434993744 |

|    |    |   |
|----|----|---|
| Ni | Ce | H |
| 63 | 1  | 1 |

Direct

|             |             |             |
|-------------|-------------|-------------|
| 0.000000000 | 0.000000000 | 0.000000000 |
| 0.166779995 | 0.083520003 | 0.094250001 |
| 0.082968466 | 0.167071953 | 0.187597677 |
| 0.000087127 | 0.000185432 | 0.284100771 |

|             |             |             |
|-------------|-------------|-------------|
| 0.250000000 | 0.000000000 | 0.000000000 |
| 0.416740000 | 0.083520003 | 0.094250001 |
| 0.334191948 | 0.167810917 | 0.188102901 |
| 0.249835014 | 0.998931110 | 0.283330232 |
| 0.500000000 | 0.000000000 | 0.000000000 |
| 0.666630030 | 0.083310001 | 0.093910001 |
| 0.584412217 | 0.166481242 | 0.187608272 |
| 0.501706600 | 0.001453152 | 0.283924669 |
| 0.750000000 | 0.000000000 | 0.000000000 |
| 0.916689992 | 0.083310001 | 0.093910001 |
| 0.833501756 | 0.166543707 | 0.188575730 |
| 0.750137150 | 0.998855829 | 0.283079594 |
| 0.000000000 | 0.250000000 | 0.000000000 |
| 0.167219996 | 0.333609998 | 0.094010003 |
| 0.083507016 | 0.415807545 | 0.187957183 |
| 0.001151355 | 0.249880627 | 0.283101171 |
| 0.250000000 | 0.250000000 | 0.000000000 |
| 0.416880012 | 0.333759993 | 0.094740003 |
| 0.335474342 | 0.417827100 | 0.190459505 |
| 0.246703669 | 0.243882269 | 0.281922251 |
| 0.500000000 | 0.250000000 | 0.000000000 |
| 0.666390002 | 0.333609998 | 0.094010003 |
| 0.582397640 | 0.417709947 | 0.190512195 |
| 0.498138934 | 0.242903367 | 0.281838089 |
| 0.750000000 | 0.250000000 | 0.000000000 |
| 0.916689992 | 0.333370000 | 0.093910001 |
| 0.833475709 | 0.415559292 | 0.187620983 |
| 0.749818683 | 0.250152081 | 0.283222824 |
| 0.000000000 | 0.500000000 | 0.000000000 |
| 0.166779995 | 0.583260000 | 0.094250001 |



|             |             |             |
|-------------|-------------|-------------|
| 0.083541654 | 0.666271806 | 0.188605726 |
| 0.998451591 | 0.498293102 | 0.283921450 |
| 0.250000000 | 0.500000000 | 0.000000000 |
| 0.416880012 | 0.583119988 | 0.094740003 |
| 0.333817422 | 0.666041493 | 0.187996715 |
| 0.245459557 | 0.500342071 | 0.283295780 |
| 0.500000000 | 0.500000000 | 0.000000000 |
| 0.666239977 | 0.583119988 | 0.094740003 |
| 0.582230806 | 0.664600670 | 0.190465838 |
| 0.750000000 | 0.500000000 | 0.000000000 |
| 0.916480005 | 0.583260000 | 0.094250001 |
| 0.832162857 | 0.665817678 | 0.188108370 |
| 0.756958425 | 0.501761556 | 0.281861842 |
| 0.000000000 | 0.750000000 | 0.000000000 |
| 0.166669995 | 0.833329976 | 0.094530001 |
| 0.083405145 | 0.916547954 | 0.188543811 |
| 0.001108236 | 0.750210166 | 0.283372402 |
| 0.250000000 | 0.750000000 | 0.000000000 |
| 0.416740000 | 0.833220005 | 0.094250001 |
| 0.333662987 | 0.916341126 | 0.188593268 |
| 0.249429673 | 0.750601232 | 0.284370214 |
| 0.500000000 | 0.750000000 | 0.000000000 |
| 0.666390002 | 0.832780004 | 0.094010003 |
| 0.584116757 | 0.916448176 | 0.187957138 |
| 0.499580503 | 0.754373312 | 0.283305436 |
| 0.750000000 | 0.750000000 | 0.000000000 |
| 0.916480005 | 0.833220005 | 0.094250001 |
| 0.833041430 | 0.917204797 | 0.187610880 |
| 0.756325424 | 0.753484607 | 0.281940401 |
| 0.502056062 | 0.497900128 | 0.339701831 |

0.336913705                      0.663076580                      0.328235418

H<sub>2</sub>Ce@Ni

1.0

|               |              |               |
|---------------|--------------|---------------|
| 10.0322999954 | 0.0000000000 | 0.0000000000  |
| -5.0161499977 | 8.6882266544 | 0.0000000000  |
| 0.0000000000  | 0.0000000000 | 21.1434993744 |

| Ni | Ce | H |
|----|----|---|
| 63 | 1  | 2 |

Direct

|              |              |              |
|--------------|--------------|--------------|
| 0.0000000000 | 0.0000000000 | 0.0000000000 |
| 0.166779995  | 0.083520003  | 0.094250001  |
| 0.081988171  | 0.166364461  | 0.187502459  |
| 0.999870658  | 0.001419648  | 0.283810467  |
| 0.250000000  | 0.000000000  | 0.000000000  |
| 0.416740000  | 0.083520003  | 0.094250001  |
| 0.333558053  | 0.167473972  | 0.187965393  |
| 0.249066889  | 0.998743415  | 0.283307284  |
| 0.500000000  | 0.000000000  | 0.000000000  |
| 0.666630030  | 0.083310001  | 0.093910001  |
| 0.584041417  | 0.166502967  | 0.187583521  |
| 0.501144826  | 0.001694885  | 0.283894449  |
| 0.750000000  | 0.000000000  | 0.000000000  |
| 0.916689992  | 0.083310001  | 0.093910001  |
| 0.832995772  | 0.166415617  | 0.188500583  |
| 0.749142945  | 0.998870909  | 0.282795668  |
| 0.000000000  | 0.250000000  | 0.000000000  |
| 0.167219996  | 0.333609998  | 0.094010003  |
| 0.082928464  | 0.415806890  | 0.187786505  |

|             |             |             |
|-------------|-------------|-------------|
| 0.000516530 | 0.249830112 | 0.282978475 |
| 0.250000000 | 0.250000000 | 0.000000000 |
| 0.416880012 | 0.333759993 | 0.094740003 |
| 0.335326135 | 0.417673320 | 0.190479144 |
| 0.245118514 | 0.242973492 | 0.281599909 |
| 0.500000000 | 0.250000000 | 0.000000000 |
| 0.666390002 | 0.333609998 | 0.094010003 |
| 0.582264900 | 0.417725414 | 0.190383688 |
| 0.497244269 | 0.243340537 | 0.281588674 |
| 0.750000000 | 0.250000000 | 0.000000000 |
| 0.916689992 | 0.333370000 | 0.093910001 |
| 0.832715213 | 0.415735871 | 0.187804028 |
| 0.748799384 | 0.249793470 | 0.283058554 |
| 0.000000000 | 0.500000000 | 0.000000000 |
| 0.166779995 | 0.583260000 | 0.094250001 |
| 0.083089024 | 0.666410089 | 0.188625455 |
| 0.998184025 | 0.496683538 | 0.283306360 |
| 0.250000000 | 0.500000000 | 0.000000000 |
| 0.416880012 | 0.583119988 | 0.094740003 |
| 0.333600342 | 0.665910065 | 0.187889740 |
| 0.244805247 | 0.500594676 | 0.282907039 |
| 0.500000000 | 0.500000000 | 0.000000000 |
| 0.666239977 | 0.583119988 | 0.094740003 |
| 0.582057714 | 0.664460063 | 0.190508902 |
| 0.750000000 | 0.500000000 | 0.000000000 |
| 0.916480005 | 0.583260000 | 0.094250001 |
| 0.832241297 | 0.665992320 | 0.187881634 |
| 0.755324423 | 0.500568569 | 0.282886982 |
| 0.000000000 | 0.750000000 | 0.000000000 |
| 0.166669995 | 0.833329976 | 0.094530001 |

|             |             |             |
|-------------|-------------|-------------|
| 0.082778782 | 0.916145325 | 0.188519955 |
| 0.001666376 | 0.750828981 | 0.284194440 |
| 0.250000000 | 0.750000000 | 0.000000000 |
| 0.416740000 | 0.833220005 | 0.094250001 |
| 0.333060652 | 0.916197658 | 0.188572660 |
| 0.248570293 | 0.750920236 | 0.284238547 |
| 0.500000000 | 0.750000000 | 0.000000000 |
| 0.666390002 | 0.832780004 | 0.094010003 |
| 0.583732665 | 0.916358888 | 0.187803924 |
| 0.499040693 | 0.754652143 | 0.283173114 |
| 0.750000000 | 0.750000000 | 0.000000000 |
| 0.916480005 | 0.833220005 | 0.094250001 |
| 0.832125247 | 0.916211128 | 0.187842861 |
| 0.754411697 | 0.754097342 | 0.283183962 |
| 0.497234583 | 0.495460182 | 0.339901447 |
| 0.335590482 | 0.663636386 | 0.327697158 |
| 0.827318907 | 0.663625360 | 0.327692538 |

H<sub>3</sub>Ce@Ni

1.0

|               |              |               |
|---------------|--------------|---------------|
| 10.032299954  | 0.000000000  | 0.000000000   |
| -5.0161499977 | 8.6882266544 | 0.000000000   |
| 0.000000000   | 0.000000000  | 21.1434993744 |

|    |    |   |
|----|----|---|
| Ni | Ce | H |
| 63 | 1  | 3 |

Direct

|             |             |             |
|-------------|-------------|-------------|
| 0.000000000 | 0.000000000 | 0.000000000 |
| 0.166779995 | 0.083520003 | 0.094250001 |
| 0.082799852 | 0.166446924 | 0.187652096 |
| 0.997713625 | 0.000044582 | 0.283302724 |

|             |             |             |
|-------------|-------------|-------------|
| 0.250000000 | 0.000000000 | 0.000000000 |
| 0.416740000 | 0.083520003 | 0.094250001 |
| 0.333487868 | 0.167137533 | 0.187752262 |
| 0.248117775 | 0.996355176 | 0.284069479 |
| 0.500000000 | 0.000000000 | 0.000000000 |
| 0.666630030 | 0.083310001 | 0.093910001 |
| 0.583682358 | 0.166495442 | 0.187706023 |
| 0.502234936 | 0.000029911 | 0.283331394 |
| 0.750000000 | 0.000000000 | 0.000000000 |
| 0.916689992 | 0.083310001 | 0.093910001 |
| 0.832995057 | 0.165917948 | 0.188334495 |
| 0.749013126 | 0.997877300 | 0.282736480 |
| 0.000000000 | 0.250000000 | 0.000000000 |
| 0.167219996 | 0.333609998 | 0.094010003 |
| 0.082772046 | 0.415364861 | 0.187715128 |
| 0.000112944 | 0.249161035 | 0.282671541 |
| 0.250000000 | 0.250000000 | 0.000000000 |
| 0.416880012 | 0.333759993 | 0.094740003 |
| 0.334968388 | 0.417113125 | 0.190430060 |
| 0.244366705 | 0.243277743 | 0.282899916 |
| 0.500000000 | 0.250000000 | 0.000000000 |
| 0.666390002 | 0.333609998 | 0.094010003 |
| 0.581970990 | 0.416911900 | 0.190424114 |
| 0.498711705 | 0.243208736 | 0.282943815 |
| 0.750000000 | 0.250000000 | 0.000000000 |
| 0.916689992 | 0.333370000 | 0.093910001 |
| 0.832582533 | 0.415398985 | 0.187732056 |
| 0.749056816 | 0.249193266 | 0.282721847 |
| 0.000000000 | 0.500000000 | 0.000000000 |
| 0.166779995 | 0.583260000 | 0.094250001 |

|             |             |             |
|-------------|-------------|-------------|
| 0.082967900 | 0.665838182 | 0.188532993 |
| 0.998043597 | 0.496189684 | 0.283364296 |
| 0.250000000 | 0.500000000 | 0.000000000 |
| 0.416880012 | 0.583119988 | 0.094740003 |
| 0.333420396 | 0.665602326 | 0.187870890 |
| 0.244589180 | 0.499437541 | 0.282821774 |
| 0.500000000 | 0.500000000 | 0.000000000 |
| 0.666239977 | 0.583119988 | 0.094740003 |
| 0.581990719 | 0.663859844 | 0.190282017 |
| 0.750000000 | 0.500000000 | 0.000000000 |
| 0.916480005 | 0.583260000 | 0.094250001 |
| 0.832120180 | 0.665504098 | 0.187900856 |
| 0.754524350 | 0.499294460 | 0.282849222 |
| 0.000000000 | 0.750000000 | 0.000000000 |
| 0.166669995 | 0.833329976 | 0.094530001 |
| 0.083099253 | 0.915910184 | 0.188550577 |
| 0.001583978 | 0.750011802 | 0.284051448 |
| 0.250000000 | 0.750000000 | 0.000000000 |
| 0.416740000 | 0.833220005 | 0.094250001 |
| 0.332804292 | 0.915977955 | 0.188578278 |
| 0.248593315 | 0.750173092 | 0.284088552 |
| 0.500000000 | 0.750000000 | 0.000000000 |
| 0.666390002 | 0.832780004 | 0.094010003 |
| 0.583549321 | 0.916017592 | 0.187784180 |
| 0.498873651 | 0.752818525 | 0.282904834 |
| 0.750000000 | 0.750000000 | 0.000000000 |
| 0.916480005 | 0.833220005 | 0.094250001 |
| 0.832553506 | 0.916051984 | 0.187678561 |
| 0.754161298 | 0.752850354 | 0.282893717 |
| 0.498987794 | 0.498346239 | 0.340758085 |

|             |             |             |
|-------------|-------------|-------------|
| 0.335669905 | 0.662543952 | 0.327344358 |
| 0.335297406 | 0.170814797 | 0.327373981 |
| 0.826834917 | 0.662237346 | 0.327349126 |

H<sub>4</sub>Ce@Ni

1.0

|               |              |               |
|---------------|--------------|---------------|
| 10.0322999954 | 0.0000000000 | 0.0000000000  |
| -5.0161499977 | 8.6882266544 | 0.0000000000  |
| 0.0000000000  | 0.0000000000 | 21.1434993744 |

|    |    |   |
|----|----|---|
| Ni | Ce | H |
| 63 | 1  | 4 |

Direct

|              |              |              |
|--------------|--------------|--------------|
| 0.0000000000 | 0.0000000000 | 0.0000000000 |
| 0.166779995  | 0.083520003  | 0.094250001  |
| 0.082892813  | 0.167266011  | 0.187760353  |
| 0.997865856  | 0.001291856  | 0.283300817  |
| 0.250000000  | 0.000000000  | 0.000000000  |
| 0.416740000  | 0.083520003  | 0.094250001  |
| 0.334321648  | 0.168033004  | 0.188190117  |
| 0.248287201  | 0.997815490  | 0.283952504  |
| 0.500000000  | 0.000000000  | 0.000000000  |
| 0.666630030  | 0.083310001  | 0.093910001  |
| 0.583330274  | 0.167262912  | 0.187856823  |
| 0.501343250  | 0.999773681  | 0.282980502  |
| 0.750000000  | 0.000000000  | 0.000000000  |
| 0.916689992  | 0.083310001  | 0.093910001  |
| 0.832491636  | 0.167073414  | 0.188460872  |
| 0.748959422  | 0.999098539  | 0.282654017  |
| 0.000000000  | 0.250000000  | 0.000000000  |
| 0.167219996  | 0.333609998  | 0.094010003  |

|             |             |             |
|-------------|-------------|-------------|
| 0.082638763 | 0.415985435 | 0.187624216 |
| 0.000168411 | 0.250448287 | 0.282570392 |
| 0.250000000 | 0.250000000 | 0.000000000 |
| 0.416880012 | 0.333759993 | 0.094740003 |
| 0.335309356 | 0.417762160 | 0.190385714 |
| 0.245331779 | 0.245476052 | 0.282810122 |
| 0.500000000 | 0.250000000 | 0.000000000 |
| 0.666390002 | 0.333609998 | 0.094010003 |
| 0.582042217 | 0.417634100 | 0.190270290 |
| 0.497651339 | 0.244663492 | 0.284381837 |
| 0.750000000 | 0.250000000 | 0.000000000 |
| 0.916689992 | 0.333370000 | 0.093910001 |
| 0.832320690 | 0.416228771 | 0.187826097 |
| 0.750205576 | 0.249244794 | 0.283608675 |
| 0.000000000 | 0.500000000 | 0.000000000 |
| 0.166779995 | 0.583260000 | 0.094250001 |
| 0.082897522 | 0.666766882 | 0.188468739 |
| 0.999610662 | 0.498154074 | 0.282945782 |
| 0.250000000 | 0.500000000 | 0.000000000 |
| 0.416880012 | 0.583119988 | 0.094740003 |
| 0.333529294 | 0.666246474 | 0.187708274 |
| 0.244561702 | 0.500818253 | 0.282604545 |
| 0.500000000 | 0.500000000 | 0.000000000 |
| 0.666239977 | 0.583119988 | 0.094740003 |
| 0.582099080 | 0.664484262 | 0.190406919 |
| 0.750000000 | 0.500000000 | 0.000000000 |
| 0.916480005 | 0.583260000 | 0.094250001 |
| 0.831911802 | 0.665496707 | 0.188167706 |
| 0.754645824 | 0.501689315 | 0.284350693 |
| 0.000000000 | 0.750000000 | 0.000000000 |



|             |             |             |
|-------------|-------------|-------------|
| 0.166669995 | 0.833329976 | 0.094530001 |
| 0.082870603 | 0.916841209 | 0.188502923 |
| 0.001450213 | 0.751066923 | 0.283918381 |
| 0.250000000 | 0.750000000 | 0.000000000 |
| 0.416740000 | 0.833220005 | 0.094250001 |
| 0.332889706 | 0.916893244 | 0.188481808 |
| 0.248063847 | 0.751604438 | 0.284070164 |
| 0.500000000 | 0.750000000 | 0.000000000 |
| 0.666390002 | 0.832780004 | 0.094010003 |
| 0.583757460 | 0.917125940 | 0.187578201 |
| 0.498886317 | 0.754965901 | 0.282630503 |
| 0.750000000 | 0.750000000 | 0.000000000 |
| 0.916480005 | 0.833220005 | 0.094250001 |
| 0.832480490 | 0.916778147 | 0.187751204 |
| 0.753729403 | 0.753795266 | 0.282829195 |
| 0.496732473 | 0.502368152 | 0.341543555 |
| 0.335335046 | 0.663932323 | 0.327084333 |
| 0.333729535 | 0.171640024 | 0.327821553 |
| 0.827668905 | 0.665391505 | 0.327820212 |
| 0.662607908 | 0.336616188 | 0.327214867 |

H<sub>5</sub>Ce@Ni

1.0

|               |              |               |
|---------------|--------------|---------------|
| 10.0322999954 | 0.0000000000 | 0.0000000000  |
| -5.0161499977 | 8.6882266544 | 0.0000000000  |
| 0.0000000000  | 0.0000000000 | 21.1434993744 |

|    |    |   |
|----|----|---|
| Ni | Ce | H |
| 63 | 1  | 5 |

Direct

|             |             |             |
|-------------|-------------|-------------|
| 0.000000000 | 0.000000000 | 0.000000000 |
|-------------|-------------|-------------|

|             |             |             |
|-------------|-------------|-------------|
| 0.166779995 | 0.083520003 | 0.094250001 |
| 0.083757699 | 0.167493984 | 0.187764660 |
| 0.998173177 | 0.000163290 | 0.282876015 |
| 0.250000000 | 0.000000000 | 0.000000000 |
| 0.416740000 | 0.083520003 | 0.094250001 |
| 0.334096283 | 0.168321192 | 0.188404709 |
| 0.249332130 | 0.998651683 | 0.283743441 |
| 0.500000000 | 0.000000000 | 0.000000000 |
| 0.666630030 | 0.083310001 | 0.093910001 |
| 0.583730638 | 0.167486608 | 0.187792331 |
| 0.501976550 | 0.000169248 | 0.282860518 |
| 0.750000000 | 0.000000000 | 0.000000000 |
| 0.916689992 | 0.083310001 | 0.093910001 |
| 0.833852291 | 0.167643517 | 0.188579887 |
| 0.749766767 | 0.999508262 | 0.282490820 |
| 0.000000000 | 0.250000000 | 0.000000000 |
| 0.167219996 | 0.333609998 | 0.094010003 |
| 0.083457410 | 0.416345477 | 0.187657714 |
| 0.998953521 | 0.249824628 | 0.283407837 |
| 0.250000000 | 0.250000000 | 0.000000000 |
| 0.416880012 | 0.333759993 | 0.094740003 |
| 0.335532278 | 0.417882770 | 0.190146402 |
| 0.247229025 | 0.245915949 | 0.284220904 |
| 0.500000000 | 0.250000000 | 0.000000000 |
| 0.666390002 | 0.333609998 | 0.094010003 |
| 0.582317591 | 0.417854488 | 0.190110803 |
| 0.498491824 | 0.245836064 | 0.284199834 |
| 0.750000000 | 0.250000000 | 0.000000000 |
| 0.916689992 | 0.333370000 | 0.093910001 |
| 0.832929790 | 0.416347504 | 0.187652230 |

|             |             |             |
|-------------|-------------|-------------|
| 0.750823140 | 0.249747366 | 0.283374429 |
| 0.000000000 | 0.500000000 | 0.000000000 |
| 0.166779995 | 0.583260000 | 0.094250001 |
| 0.083425306 | 0.666805208 | 0.188395098 |
| 0.999625325 | 0.499060720 | 0.282634616 |
| 0.250000000 | 0.500000000 | 0.000000000 |
| 0.416880012 | 0.583119988 | 0.094740003 |
| 0.333453327 | 0.665641427 | 0.188094020 |
| 0.246483549 | 0.502235055 | 0.284129947 |
| 0.500000000 | 0.500000000 | 0.000000000 |
| 0.666239977 | 0.583119988 | 0.094740003 |
| 0.582284451 | 0.664583147 | 0.190343961 |
| 0.750000000 | 0.500000000 | 0.000000000 |
| 0.916480005 | 0.583260000 | 0.094250001 |
| 0.832126498 | 0.665618896 | 0.188055724 |
| 0.755954504 | 0.502300620 | 0.284081936 |
| 0.000000000 | 0.750000000 | 0.000000000 |
| 0.166669995 | 0.833329976 | 0.094530001 |
| 0.083502799 | 0.917106211 | 0.188358501 |
| 0.003186072 | 0.751868188 | 0.283880740 |
| 0.250000000 | 0.750000000 | 0.000000000 |
| 0.416740000 | 0.833220005 | 0.094250001 |
| 0.333629042 | 0.917113066 | 0.188371360 |
| 0.248774037 | 0.751898468 | 0.283897370 |
| 0.500000000 | 0.750000000 | 0.000000000 |
| 0.666390002 | 0.832780004 | 0.094010003 |
| 0.584067523 | 0.917126358 | 0.187619284 |
| 0.499650687 | 0.754668295 | 0.282647133 |
| 0.750000000 | 0.750000000 | 0.000000000 |
| 0.916480005 | 0.833220005 | 0.094250001 |

|             |             |             |
|-------------|-------------|-------------|
| 0.833022892 | 0.917123199 | 0.187633172 |
| 0.755315721 | 0.754806638 | 0.282637924 |
| 0.503028691 | 0.505515873 | 0.342178673 |
| 0.337149709 | 0.666324496 | 0.327614367 |
| 0.335866690 | 0.171652198 | 0.328299344 |
| 0.829188347 | 0.666148484 | 0.327616423 |
| 0.172927812 | 0.337032706 | 0.326928049 |
| 0.663991451 | 0.336939484 | 0.326863289 |

H<sub>6</sub>Ce@Ni

1.0

|               |              |               |
|---------------|--------------|---------------|
| 10.0322999954 | 0.0000000000 | 0.0000000000  |
| -5.0161499977 | 8.6882266544 | 0.0000000000  |
| 0.0000000000  | 0.0000000000 | 21.1434993744 |

|    |    |   |
|----|----|---|
| Ni | Ce | H |
| 63 | 1  | 6 |

Direct

|             |             |             |
|-------------|-------------|-------------|
| 0.000000000 | 0.000000000 | 0.000000000 |
| 0.166779995 | 0.083520003 | 0.094250001 |
| 0.083000861 | 0.167356312 | 0.187653244 |
| 0.998782039 | 0.000792956 | 0.282372773 |
| 0.250000000 | 0.000000000 | 0.000000000 |
| 0.416740000 | 0.083520003 | 0.094250001 |
| 0.333525628 | 0.168161795 | 0.188375026 |
| 0.248268038 | 0.997751772 | 0.283771813 |
| 0.500000000 | 0.000000000 | 0.000000000 |
| 0.666630030 | 0.083310001 | 0.093910001 |
| 0.583363593 | 0.167381108 | 0.187656015 |
| 0.500458300 | 0.001023545 | 0.282311291 |
| 0.750000000 | 0.000000000 | 0.000000000 |

|             |             |             |
|-------------|-------------|-------------|
| 0.916689992 | 0.083310001 | 0.093910001 |
| 0.832943857 | 0.166784391 | 0.188613608 |
| 0.750012517 | 0.001588805 | 0.283252805 |
| 0.000000000 | 0.250000000 | 0.000000000 |
| 0.167219996 | 0.333609998 | 0.094010003 |
| 0.083005756 | 0.416250676 | 0.187677190 |
| 0.997922003 | 0.249509573 | 0.283246905 |
| 0.250000000 | 0.250000000 | 0.000000000 |
| 0.416880012 | 0.333759993 | 0.094740003 |
| 0.335232526 | 0.417970568 | 0.190187171 |
| 0.245904893 | 0.245286003 | 0.284079760 |
| 0.500000000 | 0.250000000 | 0.000000000 |
| 0.666390002 | 0.333609998 | 0.094010003 |
| 0.581641495 | 0.418075651 | 0.190065280 |
| 0.497651815 | 0.245419890 | 0.283946902 |
| 0.750000000 | 0.250000000 | 0.000000000 |
| 0.916689992 | 0.333370000 | 0.093910001 |
| 0.832392991 | 0.416388363 | 0.187663794 |
| 0.749916732 | 0.249599516 | 0.283153296 |
| 0.000000000 | 0.500000000 | 0.000000000 |
| 0.166779995 | 0.583260000 | 0.094250001 |
| 0.082841523 | 0.666572988 | 0.188319683 |
| 0.998611808 | 0.499353170 | 0.282395065 |
| 0.250000000 | 0.500000000 | 0.000000000 |
| 0.416880012 | 0.583119988 | 0.094740003 |
| 0.333770484 | 0.665973723 | 0.188353270 |
| 0.245794430 | 0.502180815 | 0.284123331 |
| 0.500000000 | 0.500000000 | 0.000000000 |
| 0.666239977 | 0.583119988 | 0.094740003 |
| 0.581782341 | 0.664526343 | 0.190199494 |

|             |             |             |
|-------------|-------------|-------------|
| 0.750000000 | 0.500000000 | 0.000000000 |
| 0.916480005 | 0.583260000 | 0.094250001 |
| 0.831709743 | 0.666262627 | 0.188394234 |
| 0.754103899 | 0.502016902 | 0.283972830 |
| 0.000000000 | 0.750000000 | 0.000000000 |
| 0.166669995 | 0.833329976 | 0.094530001 |
| 0.082893662 | 0.916952372 | 0.188191965 |
| 0.001671249 | 0.751437247 | 0.283770025 |
| 0.250000000 | 0.750000000 | 0.000000000 |
| 0.416740000 | 0.833220005 | 0.094250001 |
| 0.333186358 | 0.916909218 | 0.188308015 |
| 0.247983605 | 0.751887202 | 0.283840805 |
| 0.500000000 | 0.750000000 | 0.000000000 |
| 0.666390002 | 0.832780004 | 0.094010003 |
| 0.583424032 | 0.916756511 | 0.187655345 |
| 0.497627825 | 0.753851175 | 0.284058988 |
| 0.750000000 | 0.750000000 | 0.000000000 |
| 0.916480005 | 0.833220005 | 0.094250001 |
| 0.832396388 | 0.916771889 | 0.187682748 |
| 0.754130661 | 0.753616154 | 0.284067392 |
| 0.499045968 | 0.500122845 | 0.343129814 |
| 0.334788799 | 0.664582849 | 0.328184247 |
| 0.827416480 | 0.664430916 | 0.328207463 |
| 0.334969014 | 0.171799079 | 0.328165412 |
| 0.171452120 | 0.336475283 | 0.326744556 |
| 0.662981033 | 0.828105927 | 0.326787502 |
| 0.662971437 | 0.336513966 | 0.326766402 |

Ce(OH)@Ni

1.0

|               |              |               |
|---------------|--------------|---------------|
| 10.0322999954 | 0.0000000000 | 0.0000000000  |
| -5.0161499977 | 8.6882266544 | 0.0000000000  |
| 0.0000000000  | 0.0000000000 | 21.1434993744 |

|    |    |   |   |
|----|----|---|---|
| Ni | Ce | O | H |
| 63 | 1  | 1 | 1 |

Direct

|              |              |              |
|--------------|--------------|--------------|
| 0.0000000000 | 0.0000000000 | 0.0000000000 |
| 0.166779995  | 0.083520003  | 0.094250001  |
| 0.082242712  | 0.166887775  | 0.187664032  |
| 0.997022867  | 0.998007834  | 0.283979803  |
| 0.250000000  | 0.000000000  | 0.000000000  |
| 0.416740000  | 0.083520003  | 0.094250001  |
| 0.333170056  | 0.166751876  | 0.187703535  |
| 0.247997731  | 0.996825755  | 0.283319682  |
| 0.500000000  | 0.000000000  | 0.000000000  |
| 0.666630030  | 0.083310001  | 0.093910001  |
| 0.583862960  | 0.167178601  | 0.187693477  |
| 0.499849498  | 0.000272799  | 0.284028888  |
| 0.750000000  | 0.000000000  | 0.000000000  |
| 0.916689992  | 0.083310001  | 0.093910001  |
| 0.833126843  | 0.166933253  | 0.188170284  |
| 0.748426437  | 0.999315619  | 0.282864600  |
| 0.000000000  | 0.250000000  | 0.000000000  |
| 0.167219996  | 0.333609998  | 0.094010003  |
| 0.085926756  | 0.417267472  | 0.189554885  |
| 0.996186852  | 0.246757269  | 0.282720447  |
| 0.250000000  | 0.250000000  | 0.000000000  |
| 0.416880012  | 0.333759993  | 0.094740003  |
| 0.335126638  | 0.417703718  | 0.191519558  |
| 0.243425444  | 0.238906175  | 0.281105906  |

|             |             |             |
|-------------|-------------|-------------|
| 0.500000000 | 0.250000000 | 0.000000000 |
| 0.666390002 | 0.333609998 | 0.094010003 |
| 0.581671417 | 0.416556597 | 0.189851210 |
| 0.494938880 | 0.242363885 | 0.281939954 |
| 0.750000000 | 0.250000000 | 0.000000000 |
| 0.916689992 | 0.333370000 | 0.093910001 |
| 0.833047152 | 0.415606707 | 0.187430143 |
| 0.748331308 | 0.250134856 | 0.283006310 |
| 0.000000000 | 0.500000000 | 0.000000000 |
| 0.166779995 | 0.583260000 | 0.094250001 |
| 0.082510158 | 0.665841818 | 0.188195467 |
| 0.996159494 | 0.498976052 | 0.283288330 |
| 0.250000000 | 0.500000000 | 0.000000000 |
| 0.416880012 | 0.583119988 | 0.094740003 |
| 0.332462788 | 0.664616644 | 0.188733011 |
| 0.241429612 | 0.498755187 | 0.287070274 |
| 0.500000000 | 0.500000000 | 0.000000000 |
| 0.666239977 | 0.583119988 | 0.094740003 |
| 0.581476450 | 0.663912892 | 0.190054402 |
| 0.750000000 | 0.500000000 | 0.000000000 |
| 0.916480005 | 0.583260000 | 0.094250001 |
| 0.831444204 | 0.666223884 | 0.188271865 |
| 0.754019499 | 0.500770211 | 0.281945288 |
| 0.000000000 | 0.750000000 | 0.000000000 |
| 0.166669995 | 0.833329976 | 0.094530001 |
| 0.082433008 | 0.916191041 | 0.188388780 |
| 0.998548448 | 0.749446332 | 0.283343464 |
| 0.250000000 | 0.750000000 | 0.000000000 |
| 0.416740000 | 0.833220005 | 0.094250001 |
| 0.333737403 | 0.916416824 | 0.188289478 |



|             |             |             |
|-------------|-------------|-------------|
| 0.247565880 | 0.751526892 | 0.282513380 |
| 0.500000000 | 0.750000000 | 0.000000000 |
| 0.666390002 | 0.832780004 | 0.094010003 |
| 0.583842039 | 0.917392135 | 0.187273830 |
| 0.499763697 | 0.756817281 | 0.280739784 |
| 0.750000000 | 0.750000000 | 0.000000000 |
| 0.916480005 | 0.833220005 | 0.094250001 |
| 0.832114816 | 0.916571021 | 0.187752753 |
| 0.751903534 | 0.752309561 | 0.282793641 |
| 0.501561403 | 0.497965306 | 0.330282778 |
| 0.307483345 | 0.516047835 | 0.379969209 |
| 0.305393547 | 0.605372548 | 0.396701187 |

Ce(OH)<sub>2</sub>@Ni

1.0

|               |              |               |
|---------------|--------------|---------------|
| 10.0322999954 | 0.0000000000 | 0.0000000000  |
| -5.0161499977 | 8.6882266544 | 0.0000000000  |
| 0.0000000000  | 0.0000000000 | 21.1434993744 |

| Ni | Ce | O | H |
|----|----|---|---|
| 63 | 1  | 2 | 2 |

Direct

|             |             |             |
|-------------|-------------|-------------|
| 0.000000000 | 0.000000000 | 0.000000000 |
| 0.166779995 | 0.083520003 | 0.094250001 |
| 0.082085080 | 0.166599602 | 0.186997682 |
| 0.001069052 | 0.000944822 | 0.283081234 |
| 0.250000000 | 0.000000000 | 0.000000000 |
| 0.416740000 | 0.083520003 | 0.094250001 |
| 0.334500700 | 0.167693734 | 0.187804356 |
| 0.250705034 | 0.000472061 | 0.283609450 |
| 0.500000000 | 0.000000000 | 0.000000000 |

|             |             |             |
|-------------|-------------|-------------|
| 0.666630030 | 0.083310001 | 0.093910001 |
| 0.584459901 | 0.167537704 | 0.187480465 |
| 0.500377715 | 0.002326973 | 0.283496559 |
| 0.750000000 | 0.000000000 | 0.000000000 |
| 0.916689992 | 0.083310001 | 0.093910001 |
| 0.833797574 | 0.166473597 | 0.187977076 |
| 0.749150574 | 0.001811632 | 0.282541275 |
| 0.000000000 | 0.250000000 | 0.000000000 |
| 0.167219996 | 0.333609998 | 0.094010003 |
| 0.086171538 | 0.416972429 | 0.189052001 |
| 0.998455524 | 0.247801840 | 0.282412976 |
| 0.250000000 | 0.250000000 | 0.000000000 |
| 0.416880012 | 0.333759993 | 0.094740003 |
| 0.335970193 | 0.418658853 | 0.191440970 |
| 0.244758368 | 0.240445048 | 0.280260921 |
| 0.500000000 | 0.250000000 | 0.000000000 |
| 0.666390002 | 0.333609998 | 0.094010003 |
| 0.581828117 | 0.418362558 | 0.190278664 |
| 0.498136401 | 0.247160509 | 0.282078624 |
| 0.750000000 | 0.250000000 | 0.000000000 |
| 0.916689992 | 0.333370000 | 0.093910001 |
| 0.833921671 | 0.415544748 | 0.186815992 |
| 0.749137700 | 0.250533581 | 0.282894731 |
| 0.000000000 | 0.500000000 | 0.000000000 |
| 0.166779995 | 0.583260000 | 0.094250001 |
| 0.082981221 | 0.665794313 | 0.187827602 |
| 0.998324811 | 0.499990553 | 0.282807738 |
| 0.250000000 | 0.500000000 | 0.000000000 |
| 0.416880012 | 0.583119988 | 0.094740003 |
| 0.332629144 | 0.664605498 | 0.188590452 |

|             |             |             |
|-------------|-------------|-------------|
| 0.245428056 | 0.500923276 | 0.286327243 |
| 0.500000000 | 0.500000000 | 0.000000000 |
| 0.666239977 | 0.583119988 | 0.094740003 |
| 0.582178473 | 0.663950205 | 0.191704020 |
| 0.750000000 | 0.500000000 | 0.000000000 |
| 0.916480005 | 0.583260000 | 0.094250001 |
| 0.831954122 | 0.667161345 | 0.188701287 |
| 0.756576240 | 0.498938352 | 0.279891014 |
| 0.000000000 | 0.750000000 | 0.000000000 |
| 0.166669995 | 0.833329976 | 0.094530001 |
| 0.083261415 | 0.917136192 | 0.188104540 |
| 0.003338893 | 0.751162589 | 0.282027304 |
| 0.250000000 | 0.750000000 | 0.000000000 |
| 0.416740000 | 0.833220005 | 0.094250001 |
| 0.334048450 | 0.917253494 | 0.188033059 |
| 0.249102518 | 0.752943814 | 0.282125682 |
| 0.500000000 | 0.750000000 | 0.000000000 |
| 0.666390002 | 0.832780004 | 0.094010003 |
| 0.584140062 | 0.917467237 | 0.187059358 |
| 0.498288304 | 0.758171439 | 0.280152410 |
| 0.750000000 | 0.750000000 | 0.000000000 |
| 0.916480005 | 0.833220005 | 0.094250001 |
| 0.830834448 | 0.913509846 | 0.189463019 |
| 0.753797710 | 0.753954172 | 0.287025452 |
| 0.497291803 | 0.496482641 | 0.357143283 |
| 0.279200941 | 0.511278272 | 0.381287605 |
| 0.735519350 | 0.706975341 | 0.381268471 |
| 0.838693619 | 0.729734838 | 0.393179446 |
| 0.262006640 | 0.594289541 | 0.394916534 |

Ce(OH)<sub>3</sub>@Ni

1.0

|               |              |               |
|---------------|--------------|---------------|
| 10.0322999954 | 0.0000000000 | 0.0000000000  |
| -5.0161499977 | 8.6882266544 | 0.0000000000  |
| 0.0000000000  | 0.0000000000 | 21.1434993744 |

|    |    |   |   |
|----|----|---|---|
| Ni | Ce | O | H |
| 63 | 1  | 3 | 3 |

Direct

|             |             |             |
|-------------|-------------|-------------|
| 0.000000000 | 0.000000000 | 0.000000000 |
| 0.166779995 | 0.083520003 | 0.094250001 |
| 0.081599690 | 0.166880444 | 0.186841249 |
| 0.002232024 | 0.002971531 | 0.283293635 |
| 0.250000000 | 0.000000000 | 0.000000000 |
| 0.416740000 | 0.083520003 | 0.094250001 |
| 0.333892614 | 0.167856097 | 0.187398598 |
| 0.251198351 | 0.002026819 | 0.283634514 |
| 0.500000000 | 0.000000000 | 0.000000000 |
| 0.666630030 | 0.083310001 | 0.093910001 |
| 0.585194767 | 0.166758478 | 0.186855793 |
| 0.500878215 | 0.002849799 | 0.283323139 |
| 0.750000000 | 0.000000000 | 0.000000000 |
| 0.916689992 | 0.083310001 | 0.093910001 |
| 0.833571494 | 0.167161852 | 0.188103095 |
| 0.751809478 | 0.003388541 | 0.282925457 |
| 0.000000000 | 0.250000000 | 0.000000000 |
| 0.167219996 | 0.333609998 | 0.094010003 |
| 0.086560264 | 0.417629600 | 0.189268038 |
| 0.001038059 | 0.250212848 | 0.283033490 |
| 0.250000000 | 0.250000000 | 0.000000000 |
| 0.416880012 | 0.333759993 | 0.094740003 |

|             |             |             |
|-------------|-------------|-------------|
| 0.336748362 | 0.418556929 | 0.190486312 |
| 0.246120647 | 0.242851391 | 0.279913485 |
| 0.500000000 | 0.250000000 | 0.000000000 |
| 0.666390002 | 0.333609998 | 0.094010003 |
| 0.581936657 | 0.418648779 | 0.190520793 |
| 0.496855348 | 0.242950648 | 0.279883265 |
| 0.750000000 | 0.250000000 | 0.000000000 |
| 0.916689992 | 0.333370000 | 0.093910001 |
| 0.831113875 | 0.417641252 | 0.189214587 |
| 0.749355972 | 0.250215441 | 0.282975793 |
| 0.000000000 | 0.500000000 | 0.000000000 |
| 0.166779995 | 0.583260000 | 0.094250001 |
| 0.082889013 | 0.665544093 | 0.187302694 |
| 0.000689051 | 0.500893593 | 0.282886207 |
| 0.250000000 | 0.500000000 | 0.000000000 |
| 0.416880012 | 0.583119988 | 0.094740003 |
| 0.334303737 | 0.666156054 | 0.188446894 |
| 0.246846721 | 0.499393463 | 0.284756929 |
| 0.500000000 | 0.500000000 | 0.000000000 |
| 0.666239977 | 0.583119988 | 0.094740003 |
| 0.581950068 | 0.663890421 | 0.191351131 |
| 0.750000000 | 0.500000000 | 0.000000000 |
| 0.916480005 | 0.583260000 | 0.094250001 |
| 0.832034349 | 0.666247606 | 0.188367769 |
| 0.753333747 | 0.499714047 | 0.284670830 |
| 0.000000000 | 0.750000000 | 0.000000000 |
| 0.166669995 | 0.833329976 | 0.094530001 |
| 0.083513409 | 0.917943895 | 0.187769696 |
| 0.007748341 | 0.754926443 | 0.280813158 |
| 0.250000000 | 0.750000000 | 0.000000000 |

|             |             |             |
|-------------|-------------|-------------|
| 0.416740000 | 0.833220005 | 0.094250001 |
| 0.334416032 | 0.917804897 | 0.187814921 |
| 0.247817010 | 0.754706323 | 0.280962229 |
| 0.500000000 | 0.750000000 | 0.000000000 |
| 0.666390002 | 0.832780004 | 0.094010003 |
| 0.582547426 | 0.913583517 | 0.189426586 |
| 0.500338852 | 0.756460190 | 0.284929484 |
| 0.750000000 | 0.750000000 | 0.000000000 |
| 0.916480005 | 0.833220005 | 0.094250001 |
| 0.831086516 | 0.913640976 | 0.189383179 |
| 0.756802142 | 0.756954253 | 0.284825265 |
| 0.463249624 | 0.419604331 | 0.382808208 |
| 0.391132981 | 0.610728025 | 0.360756189 |
| 0.723644316 | 0.613848329 | 0.360654294 |
| 0.438722730 | 0.348471940 | 0.480442584 |
| 0.818953872 | 0.661264181 | 0.385010242 |
| 0.424313009 | 0.299817920 | 0.521329403 |
| 0.343433589 | 0.658022702 | 0.385299683 |

Ce(OH)<sub>4</sub>@Ni

1.0

|               |              |               |
|---------------|--------------|---------------|
| 10.0322999954 | 0.0000000000 | 0.0000000000  |
| -5.0161499977 | 8.6882266544 | 0.0000000000  |
| 0.0000000000  | 0.0000000000 | 21.1434993744 |

|    |    |   |   |
|----|----|---|---|
| Ni | Ce | O | H |
| 63 | 1  | 4 | 4 |

Direct

|             |             |             |
|-------------|-------------|-------------|
| 0.000000000 | 0.000000000 | 0.000000000 |
| 0.166779995 | 0.083520003 | 0.094250001 |
| 0.087377116 | 0.168503419 | 0.188646451 |

|             |             |             |
|-------------|-------------|-------------|
| 0.999681950 | 0.000165203 | 0.282027483 |
| 0.250000000 | 0.000000000 | 0.000000000 |
| 0.416740000 | 0.083520003 | 0.094250001 |
| 0.336311609 | 0.170291469 | 0.189972788 |
| 0.248964936 | 0.000026268 | 0.282147825 |
| 0.500000000 | 0.000000000 | 0.000000000 |
| 0.666630030 | 0.083310001 | 0.093910001 |
| 0.583740652 | 0.167342439 | 0.186854050 |
| 0.499397218 | 0.002054346 | 0.281812996 |
| 0.750000000 | 0.000000000 | 0.000000000 |
| 0.916689992 | 0.083310001 | 0.093910001 |
| 0.835252345 | 0.164630711 | 0.186539650 |
| 0.749900401 | 0.000364920 | 0.282070607 |
| 0.000000000 | 0.250000000 | 0.000000000 |
| 0.167219996 | 0.333609998 | 0.094010003 |
| 0.086348847 | 0.417051196 | 0.188553691 |
| 0.999642730 | 0.250196546 | 0.281983316 |
| 0.250000000 | 0.250000000 | 0.000000000 |
| 0.416880012 | 0.333759993 | 0.094740003 |
| 0.336400181 | 0.418820411 | 0.192385495 |
| 0.245209470 | 0.246697158 | 0.286734432 |
| 0.500000000 | 0.250000000 | 0.000000000 |
| 0.666390002 | 0.333609998 | 0.094010003 |
| 0.581409872 | 0.418638647 | 0.190263718 |
| 0.502819240 | 0.246392608 | 0.283432454 |
| 0.750000000 | 0.250000000 | 0.000000000 |
| 0.916689992 | 0.333370000 | 0.093910001 |
| 0.832661331 | 0.416306645 | 0.186823860 |
| 0.755617380 | 0.244547531 | 0.278346151 |
| 0.000000000 | 0.500000000 | 0.000000000 |

|             |             |             |
|-------------|-------------|-------------|
| 0.166779995 | 0.583260000 | 0.094250001 |
| 0.081135049 | 0.665631711 | 0.186749980 |
| 0.997938633 | 0.500636458 | 0.281833261 |
| 0.250000000 | 0.500000000 | 0.000000000 |
| 0.416880012 | 0.583119988 | 0.094740003 |
| 0.333349496 | 0.666571140 | 0.187589824 |
| 0.242356569 | 0.507330954 | 0.283752859 |
| 0.500000000 | 0.500000000 | 0.000000000 |
| 0.666239977 | 0.583119988 | 0.094740003 |
| 0.581145406 | 0.663650751 | 0.192365408 |
| 0.750000000 | 0.500000000 | 0.000000000 |
| 0.916480005 | 0.583260000 | 0.094250001 |
| 0.829717636 | 0.663681924 | 0.189985603 |
| 0.753582656 | 0.497263849 | 0.283416510 |
| 0.000000000 | 0.750000000 | 0.000000000 |
| 0.166669995 | 0.833329976 | 0.094530001 |
| 0.082923740 | 0.917001009 | 0.187719598 |
| 0.000122385 | 0.751054704 | 0.282146692 |
| 0.250000000 | 0.750000000 | 0.000000000 |
| 0.416740000 | 0.833220005 | 0.094250001 |
| 0.334428191 | 0.918914974 | 0.186771810 |
| 0.242895171 | 0.757249296 | 0.278740525 |
| 0.500000000 | 0.750000000 | 0.000000000 |
| 0.666390002 | 0.832780004 | 0.094010003 |
| 0.583009958 | 0.913576663 | 0.188584730 |
| 0.492523819 | 0.757518530 | 0.283714920 |
| 0.750000000 | 0.750000000 | 0.000000000 |
| 0.916480005 | 0.833220005 | 0.094250001 |
| 0.831538081 | 0.912573040 | 0.188676924 |
| 0.753200054 | 0.754730582 | 0.286739767 |



|             |             |             |
|-------------|-------------|-------------|
| 0.498430759 | 0.501359344 | 0.367475450 |
| 0.363243163 | 0.636577308 | 0.364133835 |
| 0.738698959 | 0.729001760 | 0.381208688 |
| 0.270601928 | 0.261352241 | 0.381265074 |
| 0.635118246 | 0.365360409 | 0.363494754 |
| 0.310838014 | 0.688751757 | 0.380760550 |
| 0.241219983 | 0.156618997 | 0.393455118 |
| 0.687811494 | 0.313253403 | 0.379912615 |
| 0.843094707 | 0.756691992 | 0.393241793 |

Ce(OH)<sub>5</sub>@Ni

1.0

|               |              |               |
|---------------|--------------|---------------|
| 10.032299954  | 0.000000000  | 0.000000000   |
| -5.0161499977 | 8.6882266544 | 0.000000000   |
| 0.000000000   | 0.000000000  | 21.1434993744 |

| Ni | Ce | O | H |
|----|----|---|---|
| 63 | 1  | 5 | 5 |

Direct

|             |             |             |
|-------------|-------------|-------------|
| 0.000000000 | 0.000000000 | 0.000000000 |
| 0.166779995 | 0.083520003 | 0.094250001 |
| 0.084717974 | 0.167491198 | 0.187564775 |
| 0.003179562 | 0.003610583 | 0.281984031 |
| 0.250000000 | 0.000000000 | 0.000000000 |
| 0.416740000 | 0.083520003 | 0.094250001 |
| 0.334118128 | 0.169433281 | 0.189659685 |
| 0.248074040 | 0.996858358 | 0.281241417 |
| 0.500000000 | 0.000000000 | 0.000000000 |
| 0.666630030 | 0.083310001 | 0.093910001 |
| 0.581292033 | 0.168693423 | 0.188651085 |
| 0.499249250 | 0.999415278 | 0.281942576 |

|             |             |             |
|-------------|-------------|-------------|
| 0.750000000 | 0.000000000 | 0.000000000 |
| 0.916689992 | 0.083310001 | 0.093910001 |
| 0.831340671 | 0.165581957 | 0.186196551 |
| 0.751213253 | 0.003721417 | 0.280515254 |
| 0.000000000 | 0.250000000 | 0.000000000 |
| 0.167219996 | 0.333609998 | 0.094010003 |
| 0.084707655 | 0.417147905 | 0.187540382 |
| 0.991665423 | 0.245770603 | 0.279723823 |
| 0.250000000 | 0.250000000 | 0.000000000 |
| 0.416880012 | 0.333759993 | 0.094740003 |
| 0.337474883 | 0.418643892 | 0.189705461 |
| 0.247975841 | 0.248782724 | 0.283682495 |
| 0.500000000 | 0.250000000 | 0.000000000 |
| 0.666390002 | 0.333609998 | 0.094010003 |
| 0.582480669 | 0.418318272 | 0.193118751 |
| 0.498292536 | 0.242212400 | 0.287721574 |
| 0.750000000 | 0.250000000 | 0.000000000 |
| 0.916689992 | 0.333370000 | 0.093910001 |
| 0.831878722 | 0.416948646 | 0.187609926 |
| 0.751177728 | 0.247313127 | 0.280528069 |
| 0.000000000 | 0.500000000 | 0.000000000 |
| 0.166779995 | 0.583260000 | 0.094250001 |
| 0.082605824 | 0.665924191 | 0.187419251 |
| 0.003136818 | 0.499398321 | 0.281944603 |
| 0.250000000 | 0.500000000 | 0.000000000 |
| 0.416880012 | 0.583119988 | 0.094740003 |
| 0.334038764 | 0.664401889 | 0.189636424 |
| 0.247900128 | 0.498712718 | 0.283735871 |
| 0.500000000 | 0.500000000 | 0.000000000 |
| 0.666239977 | 0.583119988 | 0.094740003 |

|             |             |             |
|-------------|-------------|-------------|
| 0.582342207 | 0.663907230 | 0.193125591 |
| 0.750000000 | 0.500000000 | 0.000000000 |
| 0.916480005 | 0.583260000 | 0.094250001 |
| 0.830781400 | 0.665320992 | 0.189436033 |
| 0.760948181 | 0.501111686 | 0.284548104 |
| 0.000000000 | 0.750000000 | 0.000000000 |
| 0.166669995 | 0.833329976 | 0.094530001 |
| 0.082538292 | 0.916538537 | 0.187426522 |
| 0.005770641 | 0.752786279 | 0.281823516 |
| 0.250000000 | 0.750000000 | 0.000000000 |
| 0.416740000 | 0.833220005 | 0.094250001 |
| 0.333847344 | 0.916869581 | 0.187239766 |
| 0.248102546 | 0.750796676 | 0.281268388 |
| 0.500000000 | 0.750000000 | 0.000000000 |
| 0.666390002 | 0.832780004 | 0.094010003 |
| 0.581192851 | 0.912432849 | 0.188653305 |
| 0.498323292 | 0.755667150 | 0.287714750 |
| 0.750000000 | 0.750000000 | 0.000000000 |
| 0.916480005 | 0.833220005 | 0.094250001 |
| 0.831823528 | 0.914715052 | 0.187634289 |
| 0.760957897 | 0.759741962 | 0.284621030 |
| 0.542010665 | 0.520858645 | 0.378360271 |
| 0.769982755 | 0.493726045 | 0.377135485 |
| 0.258525193 | 0.378935009 | 0.360851169 |
| 0.769807398 | 0.775090337 | 0.377336115 |
| 0.472288907 | 0.247995764 | 0.380524635 |
| 0.471346289 | 0.722446144 | 0.380584836 |
| 0.742613077 | 0.387367547 | 0.386216223 |
| 0.742265522 | 0.853960156 | 0.386418790 |
| 0.158510864 | 0.328650445 | 0.381654024 |

|             |             |             |
|-------------|-------------|-------------|
| 0.368783385 | 0.162681490 | 0.388815224 |
| 0.366928577 | 0.702085614 | 0.388532519 |

CeO@Ni

1.0

|               |              |               |
|---------------|--------------|---------------|
| 10.0322999954 | 0.0000000000 | 0.0000000000  |
| -5.0161499977 | 8.6882266544 | 0.0000000000  |
| 0.0000000000  | 0.0000000000 | 21.1434993744 |

|    |    |   |
|----|----|---|
| Ni | Ce | O |
| 63 | 1  | 1 |

Direct

|              |              |              |
|--------------|--------------|--------------|
| 0.0000000000 | 0.0000000000 | 0.0000000000 |
| 0.166779995  | 0.083520003  | 0.094250001  |
| 0.086468235  | 0.169206500  | 0.189096257  |
| 0.998726189  | 0.000483748  | 0.282990545  |
| 0.250000000  | 0.000000000  | 0.000000000  |
| 0.416740000  | 0.083520003  | 0.094250001  |
| 0.334106356  | 0.168353260  | 0.188551173  |
| 0.246592298  | 0.993359149  | 0.281997442  |
| 0.500000000  | 0.000000000  | 0.000000000  |
| 0.666630030  | 0.083310001  | 0.093910001  |
| 0.582724035  | 0.169157431  | 0.189117432  |
| 0.501572907  | 0.000129209  | 0.282998800  |
| 0.750000000  | 0.000000000  | 0.000000000  |
| 0.916689992  | 0.083310001  | 0.093910001  |
| 0.833948553  | 0.167760760  | 0.188163415  |
| 0.750453472  | 0.001214640  | 0.282881677  |
| 0.000000000  | 0.250000000  | 0.000000000  |
| 0.167219996  | 0.333609998  | 0.094010003  |
| 0.083359927  | 0.416581571  | 0.187655017  |

|             |             |             |
|-------------|-------------|-------------|
| 0.000370641 | 0.251676828 | 0.282723159 |
| 0.250000000 | 0.250000000 | 0.000000000 |
| 0.416880012 | 0.333759993 | 0.094740003 |
| 0.335988432 | 0.418139458 | 0.190828890 |
| 0.242996007 | 0.245251641 | 0.285649568 |
| 0.500000000 | 0.250000000 | 0.000000000 |
| 0.666390002 | 0.333609998 | 0.094010003 |
| 0.582304478 | 0.418089777 | 0.190846935 |
| 0.501660407 | 0.244608939 | 0.285573423 |
| 0.750000000 | 0.250000000 | 0.000000000 |
| 0.916689992 | 0.333370000 | 0.093910001 |
| 0.833319306 | 0.416433245 | 0.187556952 |
| 0.751338899 | 0.251610786 | 0.282709420 |
| 0.000000000 | 0.500000000 | 0.000000000 |
| 0.166779995 | 0.583260000 | 0.094250001 |
| 0.083462827 | 0.667055964 | 0.188482985 |
| 0.000418132 | 0.500319898 | 0.284063011 |
| 0.250000000 | 0.500000000 | 0.000000000 |
| 0.416880012 | 0.583119988 | 0.094740003 |
| 0.333679855 | 0.666473210 | 0.187708005 |
| 0.247888848 | 0.504887760 | 0.282097846 |
| 0.500000000 | 0.500000000 | 0.000000000 |
| 0.666239977 | 0.583119988 | 0.094740003 |
| 0.582351208 | 0.664828897 | 0.189994067 |
| 0.750000000 | 0.500000000 | 0.000000000 |
| 0.916480005 | 0.583260000 | 0.094250001 |
| 0.832624555 | 0.666545570 | 0.187673494 |
| 0.757957578 | 0.504707932 | 0.281916648 |
| 0.000000000 | 0.750000000 | 0.000000000 |
| 0.166669995 | 0.833329976 | 0.094530001 |

|             |             |             |
|-------------|-------------|-------------|
| 0.083029628 | 0.917406559 | 0.188097239 |
| 0.000893158 | 0.750738204 | 0.283379227 |
| 0.250000000 | 0.750000000 | 0.000000000 |
| 0.416740000 | 0.833220005 | 0.094250001 |
| 0.334323734 | 0.917427778 | 0.188097164 |
| 0.249703765 | 0.750583649 | 0.283404440 |
| 0.500000000 | 0.750000000 | 0.000000000 |
| 0.666390002 | 0.832780004 | 0.094010003 |
| 0.585207582 | 0.918572128 | 0.187140524 |
| 0.497819930 | 0.755824268 | 0.281199485 |
| 0.750000000 | 0.750000000 | 0.000000000 |
| 0.916480005 | 0.833220005 | 0.094250001 |
| 0.833457887 | 0.918756127 | 0.187136844 |
| 0.757682562 | 0.756314993 | 0.281387120 |
| 0.515801907 | 0.525628567 | 0.336568445 |
| 0.393308997 | 0.287700921 | 0.351171941 |

CeO<sub>2</sub>@Ni

1.0

|               |              |               |
|---------------|--------------|---------------|
| 10.0322999954 | 0.0000000000 | 0.0000000000  |
| -5.0161499977 | 8.6882266544 | 0.0000000000  |
| 0.0000000000  | 0.0000000000 | 21.1434993744 |

| Ni | Ce | O |
|----|----|---|
| 63 | 1  | 2 |

Direct

|             |             |             |
|-------------|-------------|-------------|
| 0.000000000 | 0.000000000 | 0.000000000 |
| 0.166779995 | 0.083520003 | 0.094250001 |
| 0.086607456 | 0.168933570 | 0.189135164 |
| 0.998736620 | 0.999572396 | 0.283067346 |
| 0.250000000 | 0.000000000 | 0.000000000 |

|             |             |             |
|-------------|-------------|-------------|
| 0.416740000 | 0.083520003 | 0.094250001 |
| 0.334513873 | 0.168229684 | 0.188477457 |
| 0.246663153 | 0.993454993 | 0.281942546 |
| 0.500000000 | 0.000000000 | 0.000000000 |
| 0.666630030 | 0.083310001 | 0.093910001 |
| 0.583407640 | 0.168485686 | 0.188505545 |
| 0.502529621 | 0.001122879 | 0.282018840 |
| 0.750000000 | 0.000000000 | 0.000000000 |
| 0.916689992 | 0.083310001 | 0.093910001 |
| 0.834011912 | 0.166852504 | 0.187981740 |
| 0.751358449 | 0.000000000 | 0.282576412 |
| 0.000000000 | 0.250000000 | 0.000000000 |
| 0.167219996 | 0.333609998 | 0.094010003 |
| 0.086499661 | 0.417520255 | 0.189086333 |
| 0.999667525 | 0.249662504 | 0.282557875 |
| 0.250000000 | 0.250000000 | 0.000000000 |
| 0.416880012 | 0.333759993 | 0.094740003 |
| 0.335242718 | 0.417517513 | 0.191457599 |
| 0.245421141 | 0.243861690 | 0.286605477 |
| 0.500000000 | 0.250000000 | 0.000000000 |
| 0.666390002 | 0.333609998 | 0.094010003 |
| 0.582083046 | 0.417754412 | 0.190500826 |
| 0.503218472 | 0.246189341 | 0.285222322 |
| 0.750000000 | 0.250000000 | 0.000000000 |
| 0.916689992 | 0.333370000 | 0.093910001 |
| 0.833622515 | 0.415163845 | 0.186848968 |
| 0.751370847 | 0.251214683 | 0.282553226 |
| 0.000000000 | 0.500000000 | 0.000000000 |
| 0.166779995 | 0.583260000 | 0.094250001 |
| 0.083241016 | 0.666090906 | 0.188073233 |

|             |             |             |
|-------------|-------------|-------------|
| 0.998631716 | 0.498901844 | 0.282986045 |
| 0.250000000 | 0.500000000 | 0.000000000 |
| 0.416880012 | 0.583119988 | 0.094740003 |
| 0.334437877 | 0.666223645 | 0.188519120 |
| 0.245232925 | 0.501165390 | 0.286540717 |
| 0.500000000 | 0.500000000 | 0.000000000 |
| 0.666239977 | 0.583119988 | 0.094740003 |
| 0.582042217 | 0.664256513 | 0.190521389 |
| 0.750000000 | 0.500000000 | 0.000000000 |
| 0.916480005 | 0.583260000 | 0.094250001 |
| 0.832604766 | 0.666280329 | 0.187541693 |
| 0.759127975 | 0.504259527 | 0.280359298 |
| 0.000000000 | 0.750000000 | 0.000000000 |
| 0.166669995 | 0.833329976 | 0.094530001 |
| 0.083191827 | 0.917029381 | 0.188013673 |
| 0.999379277 | 0.749601245 | 0.283660620 |
| 0.250000000 | 0.750000000 | 0.000000000 |
| 0.416740000 | 0.833220005 | 0.094250001 |
| 0.334428042 | 0.917149127 | 0.187856719 |
| 0.246824831 | 0.753028631 | 0.281955153 |
| 0.500000000 | 0.750000000 | 0.000000000 |
| 0.666390002 | 0.832780004 | 0.094010003 |
| 0.583398163 | 0.914776385 | 0.188500211 |
| 0.503085792 | 0.756605387 | 0.285291940 |
| 0.750000000 | 0.750000000 | 0.000000000 |
| 0.916480005 | 0.833220005 | 0.094250001 |
| 0.833703756 | 0.918424606 | 0.186840460 |
| 0.759143651 | 0.754733980 | 0.280405611 |
| 0.552612245 | 0.525887311 | 0.370978326 |
| 0.393443793 | 0.611570239 | 0.350035071 |



0.393794656                      0.281587809                      0.350060880

CeO<sub>3</sub>@Ni

1.0

|               |              |               |
|---------------|--------------|---------------|
| 10.0322999954 | 0.0000000000 | 0.0000000000  |
| -5.0161499977 | 8.6882266544 | 0.0000000000  |
| 0.0000000000  | 0.0000000000 | 21.1434993744 |

Ni    Ce    O

63    1    3

Direct

|             |             |             |
|-------------|-------------|-------------|
| 0.000000000 | 0.000000000 | 0.000000000 |
| 0.166779995 | 0.083520003 | 0.094250001 |
| 0.085799694 | 0.168200195 | 0.188068300 |
| 0.999009728 | 0.001681082 | 0.281619608 |
| 0.250000000 | 0.000000000 | 0.000000000 |
| 0.416740000 | 0.083520003 | 0.094250001 |
| 0.334333450 | 0.168005899 | 0.188102618 |
| 0.248102129 | 0.995413065 | 0.283064574 |
| 0.500000000 | 0.000000000 | 0.000000000 |
| 0.666630030 | 0.083310001 | 0.093910001 |
| 0.583384871 | 0.168181419 | 0.188041374 |
| 0.503189743 | 0.000898562 | 0.281601727 |
| 0.750000000 | 0.000000000 | 0.000000000 |
| 0.916689992 | 0.083310001 | 0.093910001 |
| 0.833485246 | 0.166598916 | 0.187642291 |
| 0.750878513 | 0.000765211 | 0.281853974 |
| 0.000000000 | 0.250000000 | 0.000000000 |
| 0.167219996 | 0.333609998 | 0.094010003 |
| 0.086016446 | 0.416923612 | 0.188189432 |
| 0.999520481 | 0.249319866 | 0.281891167 |

|             |             |             |
|-------------|-------------|-------------|
| 0.250000000 | 0.250000000 | 0.000000000 |
| 0.416880012 | 0.333759993 | 0.094740003 |
| 0.335809708 | 0.417722732 | 0.191060245 |
| 0.243558198 | 0.243406922 | 0.284869701 |
| 0.500000000 | 0.250000000 | 0.000000000 |
| 0.666390002 | 0.333609998 | 0.094010003 |
| 0.582600176 | 0.417470038 | 0.191143721 |
| 0.501190722 | 0.243437514 | 0.284690827 |
| 0.750000000 | 0.250000000 | 0.000000000 |
| 0.916689992 | 0.333370000 | 0.093910001 |
| 0.832000792 | 0.416747004 | 0.188010931 |
| 0.750932872 | 0.249229446 | 0.281879455 |
| 0.000000000 | 0.500000000 | 0.000000000 |
| 0.166779995 | 0.583260000 | 0.094250001 |
| 0.083068967 | 0.666199446 | 0.188155577 |
| 0.999427795 | 0.496897608 | 0.281542182 |
| 0.250000000 | 0.500000000 | 0.000000000 |
| 0.416880012 | 0.583119988 | 0.094740003 |
| 0.334155679 | 0.665900588 | 0.188113421 |
| 0.243822649 | 0.499165773 | 0.285071045 |
| 0.500000000 | 0.500000000 | 0.000000000 |
| 0.666239977 | 0.583119988 | 0.094740003 |
| 0.582414448 | 0.664353430 | 0.191089422 |
| 0.750000000 | 0.500000000 | 0.000000000 |
| 0.916480005 | 0.583260000 | 0.094250001 |
| 0.832126558 | 0.665797353 | 0.187998965 |
| 0.756689370 | 0.498764902 | 0.284540355 |
| 0.000000000 | 0.750000000 | 0.000000000 |
| 0.166669995 | 0.833329976 | 0.094530001 |
| 0.083639324 | 0.916333854 | 0.188376099 |

|             |             |             |
|-------------|-------------|-------------|
| 0.004090831 | 0.751851082 | 0.283389628 |
| 0.250000000 | 0.750000000 | 0.000000000 |
| 0.416740000 | 0.833220005 | 0.094250001 |
| 0.334026426 | 0.916991830 | 0.188045546 |
| 0.247664094 | 0.752547443 | 0.282281250 |
| 0.500000000 | 0.750000000 | 0.000000000 |
| 0.666390002 | 0.832780004 | 0.094010003 |
| 0.583177626 | 0.914162338 | 0.188216209 |
| 0.501160264 | 0.756626844 | 0.285086125 |
| 0.750000000 | 0.750000000 | 0.000000000 |
| 0.916480005 | 0.833220005 | 0.094250001 |
| 0.831988633 | 0.914675832 | 0.188022748 |
| 0.756751060 | 0.756985903 | 0.284610063 |
| 0.506041646 | 0.498747349 | 0.379118532 |
| 0.380435467 | 0.620027184 | 0.350166291 |
| 0.755040109 | 0.626941919 | 0.349990338 |
| 0.376077354 | 0.250234187 | 0.350182444 |

CeO<sub>4</sub>@Ni

1.0

|               |              |               |
|---------------|--------------|---------------|
| 10.032299954  | 0.000000000  | 0.000000000   |
| -5.0161499977 | 8.6882266544 | 0.000000000   |
| 0.0000000000  | 0.0000000000 | 21.1434993744 |

|    |    |   |
|----|----|---|
| Ni | Ce | O |
| 63 | 1  | 4 |

Direct

|             |             |             |
|-------------|-------------|-------------|
| 0.000000000 | 0.000000000 | 0.000000000 |
| 0.166779995 | 0.083520003 | 0.094250001 |
| 0.085025117 | 0.167829886 | 0.187605605 |
| 0.998336971 | 0.003930429 | 0.280678600 |

|             |             |             |
|-------------|-------------|-------------|
| 0.250000000 | 0.000000000 | 0.000000000 |
| 0.416740000 | 0.083520003 | 0.094250001 |
| 0.334603310 | 0.167445257 | 0.188895524 |
| 0.244524255 | 0.991454720 | 0.282232523 |
| 0.500000000 | 0.000000000 | 0.000000000 |
| 0.666630030 | 0.083310001 | 0.093910001 |
| 0.583031714 | 0.167503089 | 0.188988611 |
| 0.496911258 | 0.990496457 | 0.281205118 |
| 0.750000000 | 0.000000000 | 0.000000000 |
| 0.916689992 | 0.083310001 | 0.093910001 |
| 0.832356691 | 0.167739257 | 0.188605785 |
| 0.749292791 | 0.000742101 | 0.281535506 |
| 0.000000000 | 0.250000000 | 0.000000000 |
| 0.167219996 | 0.333609998 | 0.094010003 |
| 0.087256342 | 0.417610258 | 0.188378483 |
| 0.999515891 | 0.249676064 | 0.281663686 |
| 0.250000000 | 0.250000000 | 0.000000000 |
| 0.416880012 | 0.333759993 | 0.094740003 |
| 0.335578501 | 0.416635185 | 0.190622106 |
| 0.240540370 | 0.241875365 | 0.284619689 |
| 0.500000000 | 0.250000000 | 0.000000000 |
| 0.666390002 | 0.333609998 | 0.094010003 |
| 0.582356036 | 0.415806890 | 0.190741464 |
| 0.491697162 | 0.235580415 | 0.288062155 |
| 0.750000000 | 0.250000000 | 0.000000000 |
| 0.916689992 | 0.333370000 | 0.093910001 |
| 0.832798481 | 0.415205300 | 0.187651753 |
| 0.751915872 | 0.245892152 | 0.286676288 |
| 0.000000000 | 0.500000000 | 0.000000000 |
| 0.166779995 | 0.583260000 | 0.094250001 |

|             |             |             |
|-------------|-------------|-------------|
| 0.081550471 | 0.667414606 | 0.188961700 |
| 0.008930711 | 0.499265611 | 0.281231761 |
| 0.250000000 | 0.500000000 | 0.000000000 |
| 0.416880012 | 0.583119988 | 0.094740003 |
| 0.333809942 | 0.665407479 | 0.188783258 |
| 0.251125574 | 0.499801189 | 0.287243187 |
| 0.500000000 | 0.500000000 | 0.000000000 |
| 0.666239977 | 0.583119988 | 0.094740003 |
| 0.582183242 | 0.663483977 | 0.190084189 |
| 0.750000000 | 0.500000000 | 0.000000000 |
| 0.916480005 | 0.583260000 | 0.094250001 |
| 0.832166314 | 0.664978921 | 0.187757090 |
| 0.761865854 | 0.501903713 | 0.282562792 |
| 0.000000000 | 0.750000000 | 0.000000000 |
| 0.166669995 | 0.833329976 | 0.094530001 |
| 0.082021505 | 0.914440811 | 0.188690796 |
| 0.998427331 | 0.750155389 | 0.289662629 |
| 0.250000000 | 0.750000000 | 0.000000000 |
| 0.416740000 | 0.833220005 | 0.094250001 |
| 0.333250999 | 0.916530371 | 0.187624797 |
| 0.245477557 | 0.751413047 | 0.282003641 |
| 0.500000000 | 0.750000000 | 0.000000000 |
| 0.666390002 | 0.832780004 | 0.094010003 |
| 0.582561016 | 0.913219929 | 0.188152313 |
| 0.503138304 | 0.751690328 | 0.286262423 |
| 0.750000000 | 0.750000000 | 0.000000000 |
| 0.916480005 | 0.833220005 | 0.094250001 |
| 0.831981242 | 0.916243434 | 0.186876014 |
| 0.755228996 | 0.759348035 | 0.281601906 |
| 0.551786900 | 0.494208425 | 0.380304903 |

|             |             |             |
|-------------|-------------|-------------|
| 0.409790725 | 0.598017395 | 0.347785681 |
| 0.813345194 | 0.668387294 | 0.345562547 |
| 0.362708360 | 0.257421494 | 0.352654725 |
| 0.671250880 | 0.333915859 | 0.342670500 |

H<sub>6</sub>Ce@Ni-H<sub>Ni</sub>

1.0

|               |              |               |
|---------------|--------------|---------------|
| 10.0322999954 | 0.0000000000 | 0.0000000000  |
| -5.0161499977 | 8.6882266544 | 0.0000000000  |
| 0.0000000000  | 0.0000000000 | 21.1434993744 |

|    |    |   |
|----|----|---|
| Ni | Ce | H |
| 63 | 1  | 7 |

Direct

|              |              |              |
|--------------|--------------|--------------|
| 0.0000000000 | 0.0000000000 | 0.0000000000 |
| 0.166779995  | 0.083520003  | 0.094250001  |
| 0.083869867  | 0.168243140  | 0.187760383  |
| 0.000236824  | 0.001645507  | 0.282476485  |
| 0.250000000  | 0.000000000  | 0.000000000  |
| 0.416740000  | 0.083520003  | 0.094250001  |
| 0.333357602  | 0.168128833  | 0.188329473  |
| 0.248679951  | 0.998322964  | 0.283740312  |
| 0.500000000  | 0.000000000  | 0.000000000  |
| 0.666630030  | 0.083310001  | 0.093910001  |
| 0.583257556  | 0.166887373  | 0.187432811  |
| 0.500053108  | 0.998962402  | 0.282177001  |
| 0.750000000  | 0.000000000  | 0.000000000  |
| 0.916689992  | 0.083310001  | 0.093910001  |
| 0.833731890  | 0.167308062  | 0.188458875  |
| 0.751737773  | 0.002394314  | 0.283090442  |
| 0.000000000  | 0.250000000  | 0.000000000  |

|             |             |             |
|-------------|-------------|-------------|
| 0.167219996 | 0.333609998 | 0.094010003 |
| 0.084228463 | 0.417327434 | 0.188262418 |
| 0.998132586 | 0.248919666 | 0.283476233 |
| 0.250000000 | 0.250000000 | 0.000000000 |
| 0.416880012 | 0.333759993 | 0.094740003 |
| 0.335287571 | 0.419421196 | 0.191352710 |
| 0.247811735 | 0.246720418 | 0.284128517 |
| 0.500000000 | 0.250000000 | 0.000000000 |
| 0.666390002 | 0.333609998 | 0.094010003 |
| 0.581277311 | 0.417546898 | 0.189811587 |
| 0.497742057 | 0.243911028 | 0.283770621 |
| 0.750000000 | 0.250000000 | 0.000000000 |
| 0.916689992 | 0.333370000 | 0.093910001 |
| 0.831375301 | 0.415551394 | 0.187040821 |
| 0.749379694 | 0.248241097 | 0.282684177 |
| 0.000000000 | 0.500000000 | 0.000000000 |
| 0.166779995 | 0.583260000 | 0.094250001 |
| 0.082863070 | 0.666100085 | 0.188111484 |
| 0.992234826 | 0.496061087 | 0.281802863 |
| 0.250000000 | 0.500000000 | 0.000000000 |
| 0.416880012 | 0.583119988 | 0.094740003 |
| 0.334440440 | 0.666420639 | 0.188880488 |
| 0.244714290 | 0.503851473 | 0.288082272 |
| 0.500000000 | 0.500000000 | 0.000000000 |
| 0.666239977 | 0.583119988 | 0.094740003 |
| 0.582623363 | 0.664311469 | 0.189816535 |
| 0.750000000 | 0.500000000 | 0.000000000 |
| 0.916480005 | 0.583260000 | 0.094250001 |
| 0.831979454 | 0.665974498 | 0.188195109 |
| 0.752389789 | 0.500922382 | 0.283035994 |

|             |             |             |
|-------------|-------------|-------------|
| 0.000000000 | 0.750000000 | 0.000000000 |
| 0.166669995 | 0.833329976 | 0.094530001 |
| 0.083066888 | 0.916927576 | 0.188262492 |
| 0.001743464 | 0.751542449 | 0.283750355 |
| 0.250000000 | 0.750000000 | 0.000000000 |
| 0.416740000 | 0.833220005 | 0.094250001 |
| 0.332677782 | 0.916122735 | 0.188463122 |
| 0.247905478 | 0.752540648 | 0.284232944 |
| 0.500000000 | 0.750000000 | 0.000000000 |
| 0.666390002 | 0.832780004 | 0.094010003 |
| 0.583809674 | 0.916632533 | 0.187654004 |
| 0.502732635 | 0.754797637 | 0.283275485 |
| 0.750000000 | 0.750000000 | 0.000000000 |
| 0.916480005 | 0.833220005 | 0.094250001 |
| 0.833017349 | 0.916998029 | 0.187619925 |
| 0.756651640 | 0.754005373 | 0.283926338 |
| 0.503662944 | 0.498182356 | 0.343924910 |
| 0.369849056 | 0.652227163 | 0.333081603 |
| 0.828278244 | 0.663361728 | 0.327840745 |
| 0.335687399 | 0.171409875 | 0.328193903 |
| 0.173888713 | 0.334661126 | 0.327625930 |
| 0.667300880 | 0.829783499 | 0.326389045 |
| 0.664127588 | 0.335296720 | 0.326091141 |
| 0.144084111 | 0.581872046 | 0.325666040 |

H<sub>6</sub>Ce@Ni-H<sub>Ce</sub>

1.0

|               |              |               |
|---------------|--------------|---------------|
| 10.0322999954 | 0.000000000  | 0.000000000   |
| -5.0161499977 | 8.6882266544 | 0.000000000   |
| 0.000000000   | 0.000000000  | 21.1434993744 |



Ni Ce H  
63 1 7

Direct

|             |             |             |
|-------------|-------------|-------------|
| 0.000000000 | 0.000000000 | 0.000000000 |
| 0.166779995 | 0.083520003 | 0.094250001 |
| 0.083337732 | 0.167217612 | 0.187745243 |
| 0.999072492 | 0.000417165 | 0.282716244 |
| 0.250000000 | 0.000000000 | 0.000000000 |
| 0.416740000 | 0.083520003 | 0.094250001 |
| 0.333913147 | 0.168218270 | 0.188430443 |
| 0.249073178 | 0.998669505 | 0.283802867 |
| 0.500000000 | 0.000000000 | 0.000000000 |
| 0.666630030 | 0.083310001 | 0.093910001 |
| 0.583573520 | 0.167195708 | 0.187747195 |
| 0.500803232 | 0.000775370 | 0.282811999 |
| 0.750000000 | 0.000000000 | 0.000000000 |
| 0.916689992 | 0.083310001 | 0.093910001 |
| 0.833286405 | 0.166749120 | 0.188861102 |
| 0.750078857 | 0.000867766 | 0.283367366 |
| 0.000000000 | 0.250000000 | 0.000000000 |
| 0.167219996 | 0.333609998 | 0.094010003 |
| 0.083317243 | 0.416326284 | 0.187776685 |
| 0.998966336 | 0.249699101 | 0.283351302 |
| 0.250000000 | 0.250000000 | 0.000000000 |
| 0.416880012 | 0.333759993 | 0.094740003 |
| 0.335561454 | 0.417939216 | 0.189941272 |
| 0.247897208 | 0.246691465 | 0.283846557 |
| 0.500000000 | 0.250000000 | 0.000000000 |
| 0.666390002 | 0.333609998 | 0.094010003 |
| 0.581922889 | 0.417914957 | 0.189826205 |

|             |             |             |
|-------------|-------------|-------------|
| 0.498199195 | 0.246927798 | 0.283742517 |
| 0.750000000 | 0.250000000 | 0.000000000 |
| 0.916689992 | 0.333370000 | 0.093910001 |
| 0.832645178 | 0.416364789 | 0.187772498 |
| 0.749781191 | 0.249761492 | 0.283338010 |
| 0.000000000 | 0.500000000 | 0.000000000 |
| 0.166779995 | 0.583260000 | 0.094250001 |
| 0.083167523 | 0.666587710 | 0.188365981 |
| 0.998973548 | 0.498911351 | 0.282724023 |
| 0.250000000 | 0.500000000 | 0.000000000 |
| 0.416880012 | 0.583119988 | 0.094740003 |
| 0.333948344 | 0.665870428 | 0.188418165 |
| 0.247926772 | 0.501637042 | 0.283829600 |
| 0.500000000 | 0.500000000 | 0.000000000 |
| 0.666239977 | 0.583119988 | 0.094740003 |
| 0.581952393 | 0.664339066 | 0.189933404 |
| 0.750000000 | 0.500000000 | 0.000000000 |
| 0.916480005 | 0.583260000 | 0.094250001 |
| 0.831729531 | 0.666021347 | 0.188469470 |
| 0.752965510 | 0.501737356 | 0.283728421 |
| 0.000000000 | 0.750000000 | 0.000000000 |
| 0.166669995 | 0.833329976 | 0.094530001 |
| 0.083189026 | 0.916660130 | 0.188411593 |
| 0.001136650 | 0.750725210 | 0.283798248 |
| 0.250000000 | 0.750000000 | 0.000000000 |
| 0.416740000 | 0.833220005 | 0.094250001 |
| 0.333237469 | 0.916669726 | 0.188404977 |
| 0.248991594 | 0.750712752 | 0.283816278 |
| 0.500000000 | 0.750000000 | 0.000000000 |
| 0.666390002 | 0.832780004 | 0.094010003 |

|             |             |             |
|-------------|-------------|-------------|
| 0.583510995 | 0.916570485 | 0.187791243 |
| 0.498071283 | 0.751895487 | 0.283846825 |
| 0.750000000 | 0.750000000 | 0.000000000 |
| 0.916480005 | 0.833220005 | 0.094250001 |
| 0.832647026 | 0.916439176 | 0.187770680 |
| 0.752985179 | 0.751993060 | 0.283813179 |
| 0.499074429 | 0.500142694 | 0.360871792 |
| 0.336902589 | 0.662820220 | 0.328290343 |
| 0.824970782 | 0.662756205 | 0.328275949 |
| 0.337032735 | 0.174726367 | 0.328240544 |
| 0.174600393 | 0.337482452 | 0.326850742 |
| 0.662088752 | 0.825191855 | 0.326835066 |
| 0.662227690 | 0.337804705 | 0.326828629 |
| 0.497853220 | 0.500472009 | 0.461001724 |

H<sub>6</sub>Ce@Ni-H<sub>2</sub>O

1.0

|               |              |               |
|---------------|--------------|---------------|
| 10.0322999954 | 0.0000000000 | 0.0000000000  |
| -5.0161499977 | 8.6882266544 | 0.0000000000  |
| 0.0000000000  | 0.0000000000 | 21.1434993744 |

| Ni | Ce | H | O |
|----|----|---|---|
| 63 | 1  | 8 | 1 |

Direct

|             |             |             |
|-------------|-------------|-------------|
| 0.000000000 | 0.000000000 | 0.000000000 |
| 0.166779995 | 0.083520003 | 0.094250001 |
| 0.083306499 | 0.167247504 | 0.187662736 |
| 0.999543846 | 0.000898354 | 0.282554835 |
| 0.250000000 | 0.000000000 | 0.000000000 |
| 0.416740000 | 0.083520003 | 0.094250001 |
| 0.333955497 | 0.168172926 | 0.188429773 |

|             |             |             |
|-------------|-------------|-------------|
| 0.248636171 | 0.997537732 | 0.283846289 |
| 0.500000000 | 0.000000000 | 0.000000000 |
| 0.666630030 | 0.083310001 | 0.093910001 |
| 0.583871484 | 0.167334795 | 0.187649921 |
| 0.501185536 | 0.001035419 | 0.282567978 |
| 0.750000000 | 0.000000000 | 0.000000000 |
| 0.916689992 | 0.083310001 | 0.093910001 |
| 0.833293319 | 0.166739985 | 0.188791648 |
| 0.750723362 | 0.001625681 | 0.283389002 |
| 0.000000000 | 0.250000000 | 0.000000000 |
| 0.167219996 | 0.333609998 | 0.094010003 |
| 0.083238967 | 0.416219324 | 0.187677488 |
| 0.998653054 | 0.249516219 | 0.283364803 |
| 0.250000000 | 0.250000000 | 0.000000000 |
| 0.416880012 | 0.333759993 | 0.094740003 |
| 0.335465878 | 0.417843223 | 0.190240741 |
| 0.246021628 | 0.244524106 | 0.284158885 |
| 0.500000000 | 0.250000000 | 0.000000000 |
| 0.666390002 | 0.333609998 | 0.094010003 |
| 0.582232714 | 0.417858899 | 0.190214172 |
| 0.498185068 | 0.244580761 | 0.284041286 |
| 0.750000000 | 0.250000000 | 0.000000000 |
| 0.916689992 | 0.333370000 | 0.093910001 |
| 0.832765460 | 0.416275918 | 0.187670767 |
| 0.750581980 | 0.249532908 | 0.283336967 |
| 0.000000000 | 0.500000000 | 0.000000000 |
| 0.166779995 | 0.583260000 | 0.094250001 |
| 0.083219886 | 0.666530609 | 0.188292086 |
| 0.999119759 | 0.498925030 | 0.282617867 |
| 0.250000000 | 0.500000000 | 0.000000000 |

|             |             |             |
|-------------|-------------|-------------|
| 0.416880012 | 0.583119988 | 0.094740003 |
| 0.334063053 | 0.665926218 | 0.188408211 |
| 0.245737582 | 0.502067327 | 0.284229159 |
| 0.500000000 | 0.500000000 | 0.000000000 |
| 0.666239977 | 0.583119988 | 0.094740003 |
| 0.582221627 | 0.664581895 | 0.190259278 |
| 0.750000000 | 0.500000000 | 0.000000000 |
| 0.916480005 | 0.583260000 | 0.094250001 |
| 0.831817746 | 0.666074872 | 0.188448712 |
| 0.755639732 | 0.502120316 | 0.284207135 |
| 0.000000000 | 0.750000000 | 0.000000000 |
| 0.166669995 | 0.833329976 | 0.094530001 |
| 0.083229154 | 0.916814566 | 0.188293010 |
| 0.002743122 | 0.751570106 | 0.283869863 |
| 0.250000000 | 0.750000000 | 0.000000000 |
| 0.416740000 | 0.833220005 | 0.094250001 |
| 0.333537370 | 0.916795611 | 0.188300818 |
| 0.248404175 | 0.751662374 | 0.283854783 |
| 0.500000000 | 0.750000000 | 0.000000000 |
| 0.666390002 | 0.832780004 | 0.094010003 |
| 0.583910584 | 0.916838109 | 0.187642157 |
| 0.498104692 | 0.754572988 | 0.284058839 |
| 0.750000000 | 0.750000000 | 0.000000000 |
| 0.916480005 | 0.833220005 | 0.094250001 |
| 0.832821131 | 0.916740060 | 0.187658221 |
| 0.756019890 | 0.754416049 | 0.284181416 |
| 0.499651849 | 0.500717342 | 0.342940181 |
| 0.335169852 | 0.664974272 | 0.328281343 |
| 0.829379976 | 0.664864779 | 0.328420669 |
| 0.335388184 | 0.170905560 | 0.328235984 |

|             |             |             |
|-------------|-------------|-------------|
| 0.172107562 | 0.336327314 | 0.326920897 |
| 0.663889110 | 0.828114867 | 0.326776356 |
| 0.663859665 | 0.336316675 | 0.326832771 |
| 0.399251729 | 0.439383090 | 0.496060282 |
| 0.578091145 | 0.516144037 | 0.498376667 |
| 0.492265433 | 0.495858252 | 0.470835209 |

H<sub>6</sub>Ce@Ni-OH

1.0

|               |              |               |
|---------------|--------------|---------------|
| 10.0322999954 | 0.0000000000 | 0.0000000000  |
| -5.0161499977 | 8.6882266544 | 0.0000000000  |
| 0.0000000000  | 0.0000000000 | 21.1434993744 |

|    |    |   |   |
|----|----|---|---|
| Ni | Ce | H | O |
| 63 | 1  | 7 | 1 |

Direct

|             |             |             |
|-------------|-------------|-------------|
| 0.000000000 | 0.000000000 | 0.000000000 |
| 0.166779995 | 0.083520003 | 0.094250001 |
| 0.083413079 | 0.167332262 | 0.187673390 |
| 0.999556005 | 0.000836002 | 0.282521307 |
| 0.250000000 | 0.000000000 | 0.000000000 |
| 0.416740000 | 0.083520003 | 0.094250001 |
| 0.334019750 | 0.168148413 | 0.188360676 |
| 0.248893738 | 0.997951388 | 0.283694983 |
| 0.500000000 | 0.000000000 | 0.000000000 |
| 0.666630030 | 0.083310001 | 0.093910001 |
| 0.583618283 | 0.167160481 | 0.187762544 |
| 0.501122952 | 0.000122559 | 0.282660425 |
| 0.750000000 | 0.000000000 | 0.000000000 |
| 0.916689992 | 0.083310001 | 0.093910001 |
| 0.833349586 | 0.166681886 | 0.188837618 |

|             |             |             |
|-------------|-------------|-------------|
| 0.750445426 | 0.000846569 | 0.283355147 |
| 0.000000000 | 0.250000000 | 0.000000000 |
| 0.167219996 | 0.333609998 | 0.094010003 |
| 0.083385155 | 0.416311234 | 0.187698260 |
| 0.998929143 | 0.249526054 | 0.283339500 |
| 0.250000000 | 0.250000000 | 0.000000000 |
| 0.416880012 | 0.333759993 | 0.094740003 |
| 0.335747629 | 0.418011606 | 0.189843938 |
| 0.248152882 | 0.246595711 | 0.283851951 |
| 0.500000000 | 0.250000000 | 0.000000000 |
| 0.666390002 | 0.333609998 | 0.094010003 |
| 0.581981897 | 0.417686611 | 0.189836219 |
| 0.497927636 | 0.245865539 | 0.283977747 |
| 0.750000000 | 0.250000000 | 0.000000000 |
| 0.916689992 | 0.333370000 | 0.093910001 |
| 0.832589924 | 0.416229993 | 0.187724248 |
| 0.750188947 | 0.249386057 | 0.283335209 |
| 0.000000000 | 0.500000000 | 0.000000000 |
| 0.166779995 | 0.583260000 | 0.094250001 |
| 0.083139315 | 0.666384399 | 0.188333973 |
| 0.998849750 | 0.498753905 | 0.282619268 |
| 0.250000000 | 0.500000000 | 0.000000000 |
| 0.416880012 | 0.583119988 | 0.094740003 |
| 0.334085673 | 0.665927708 | 0.188426584 |
| 0.247840017 | 0.501496434 | 0.283959538 |
| 0.500000000 | 0.500000000 | 0.000000000 |
| 0.666239977 | 0.583119988 | 0.094740003 |
| 0.582249105 | 0.664205849 | 0.189852312 |
| 0.750000000 | 0.500000000 | 0.000000000 |
| 0.916480005 | 0.583260000 | 0.094250001 |

|             |             |             |
|-------------|-------------|-------------|
| 0.831736028 | 0.665923536 | 0.188434929 |
| 0.752932489 | 0.501466155 | 0.283947945 |
| 0.000000000 | 0.750000000 | 0.000000000 |
| 0.166669995 | 0.833329976 | 0.094530001 |
| 0.083178096 | 0.916718483 | 0.188297510 |
| 0.001641962 | 0.750844896 | 0.283761084 |
| 0.250000000 | 0.750000000 | 0.000000000 |
| 0.416740000 | 0.833220005 | 0.094250001 |
| 0.333425134 | 0.916666389 | 0.188362539 |
| 0.248798326 | 0.750742674 | 0.283776939 |
| 0.500000000 | 0.750000000 | 0.000000000 |
| 0.666390002 | 0.832780004 | 0.094010003 |
| 0.583706498 | 0.916475534 | 0.187764227 |
| 0.498235196 | 0.751335859 | 0.284044653 |
| 0.750000000 | 0.750000000 | 0.000000000 |
| 0.916480005 | 0.833220005 | 0.094250001 |
| 0.832715333 | 0.916467786 | 0.187753737 |
| 0.753841221 | 0.752270162 | 0.284043580 |
| 0.499535948 | 0.499514937 | 0.350714445 |
| 0.335688174 | 0.663589239 | 0.328116536 |
| 0.827267230 | 0.663820565 | 0.328197151 |
| 0.335357636 | 0.172049984 | 0.328119457 |
| 0.173165575 | 0.336590111 | 0.326808274 |
| 0.663427830 | 0.826563418 | 0.326890528 |
| 0.663142383 | 0.336591989 | 0.326766819 |
| 0.481451929 | 0.491388589 | 0.496581972 |
| 0.489813864 | 0.493995309 | 0.450897902 |

Ce(OH)<sub>5</sub>@Ni-H<sub>Ni</sub>

1.0



|               |              |               |
|---------------|--------------|---------------|
| 10.0322999954 | 0.0000000000 | 0.0000000000  |
| -5.0161499977 | 8.6882266544 | 0.0000000000  |
| 0.0000000000  | 0.0000000000 | 21.1434993744 |

|    |    |   |   |
|----|----|---|---|
| Ni | Ce | O | H |
| 63 | 1  | 5 | 6 |

Direct

|              |              |              |
|--------------|--------------|--------------|
| 0.0000000000 | 0.0000000000 | 0.0000000000 |
| 0.166779995  | 0.083520003  | 0.094250001  |
| 0.085275181  | 0.168211773  | 0.187559888  |
| 0.004131836  | 0.004843484  | 0.281924158  |
| 0.250000000  | 0.000000000  | 0.000000000  |
| 0.416740000  | 0.083520003  | 0.094250001  |
| 0.334342688  | 0.169957787  | 0.189596742  |
| 0.248866379  | 0.998723388  | 0.281101495  |
| 0.500000000  | 0.000000000  | 0.000000000  |
| 0.666630030  | 0.083310001  | 0.093910001  |
| 0.581606388  | 0.169106543  | 0.188497230  |
| 0.499796480  | 0.000423530  | 0.281615168  |
| 0.750000000  | 0.000000000  | 0.000000000  |
| 0.916689992  | 0.083310001  | 0.093910001  |
| 0.832062185  | 0.166272700  | 0.186124384  |
| 0.751745641  | 0.004489173  | 0.280419528  |
| 0.000000000  | 0.250000000  | 0.000000000  |
| 0.167219996  | 0.333609998  | 0.094010003  |
| 0.085454166  | 0.417885333  | 0.187631622  |
| 0.992099822  | 0.245752186  | 0.279900253  |
| 0.250000000  | 0.250000000  | 0.000000000  |
| 0.416880012  | 0.333759993  | 0.094740003  |
| 0.337847084  | 0.419847190  | 0.190008879  |
| 0.248145655  | 0.249895245  | 0.283629268  |

|             |             |             |
|-------------|-------------|-------------|
| 0.500000000 | 0.250000000 | 0.000000000 |
| 0.666390002 | 0.333609998 | 0.094010003 |
| 0.582688034 | 0.418588012 | 0.192869872 |
| 0.499176979 | 0.243276700 | 0.287412047 |
| 0.750000000 | 0.250000000 | 0.000000000 |
| 0.916689992 | 0.333370000 | 0.093910001 |
| 0.832712948 | 0.417317033 | 0.187499762 |
| 0.751498818 | 0.247634381 | 0.280217022 |
| 0.000000000 | 0.500000000 | 0.000000000 |
| 0.166779995 | 0.583260000 | 0.094250001 |
| 0.082861170 | 0.666171849 | 0.187366411 |
| 0.001012454 | 0.498536021 | 0.282468975 |
| 0.250000000 | 0.500000000 | 0.000000000 |
| 0.416880012 | 0.583119988 | 0.094740003 |
| 0.334657520 | 0.665343344 | 0.189646885 |
| 0.249038562 | 0.499131620 | 0.284654856 |
| 0.500000000 | 0.500000000 | 0.000000000 |
| 0.666239977 | 0.583119988 | 0.094740003 |
| 0.582971752 | 0.664543211 | 0.193059489 |
| 0.750000000 | 0.500000000 | 0.000000000 |
| 0.916480005 | 0.583260000 | 0.094250001 |
| 0.831294775 | 0.665555954 | 0.189293727 |
| 0.760843515 | 0.501373947 | 0.284120202 |
| 0.000000000 | 0.750000000 | 0.000000000 |
| 0.166669995 | 0.833329976 | 0.094530001 |
| 0.083085783 | 0.916948795 | 0.187366247 |
| 0.006302525 | 0.754470706 | 0.281654954 |
| 0.250000000 | 0.750000000 | 0.000000000 |
| 0.416740000 | 0.833220005 | 0.094250001 |
| 0.333729476 | 0.916785359 | 0.187353283 |

|             |             |             |
|-------------|-------------|-------------|
| 0.249216735 | 0.753221929 | 0.282042027 |
| 0.500000000 | 0.750000000 | 0.000000000 |
| 0.666390002 | 0.832780004 | 0.094010003 |
| 0.581755280 | 0.913316488 | 0.188448459 |
| 0.501199841 | 0.757753491 | 0.287278324 |
| 0.750000000 | 0.750000000 | 0.000000000 |
| 0.916480005 | 0.833220005 | 0.094250001 |
| 0.832379043 | 0.915392876 | 0.187489927 |
| 0.762222588 | 0.760433197 | 0.284334958 |
| 0.546692431 | 0.524131835 | 0.378648132 |
| 0.772496104 | 0.494774818 | 0.376673281 |
| 0.263129741 | 0.376099378 | 0.361303717 |
| 0.775778890 | 0.777454495 | 0.377154350 |
| 0.473497838 | 0.250118911 | 0.379974842 |
| 0.476432025 | 0.725815058 | 0.379971564 |
| 0.746088386 | 0.388665736 | 0.385700166 |
| 0.752341449 | 0.859079599 | 0.386461437 |
| 0.164223045 | 0.331785172 | 0.382769018 |
| 0.367634863 | 0.168968573 | 0.387779832 |
| 0.373619050 | 0.709820211 | 0.387982517 |
| 0.162290603 | 0.591854870 | 0.325570285 |

Ce(OH)<sub>5</sub>@Ni-H<sub>Ce</sub>

1.0

|               |              |               |
|---------------|--------------|---------------|
| 10.0322999954 | 0.0000000000 | 0.0000000000  |
| -5.0161499977 | 8.6882266544 | 0.0000000000  |
| 0.0000000000  | 0.0000000000 | 21.1434993744 |

|    |    |   |   |
|----|----|---|---|
| Ni | Ce | O | H |
| 63 | 1  | 5 | 6 |

Direct

|             |             |             |
|-------------|-------------|-------------|
| 0.000000000 | 0.000000000 | 0.000000000 |
| 0.166779995 | 0.083520003 | 0.094250001 |
| 0.085035861 | 0.167550474 | 0.187667668 |
| 0.002922826 | 0.003194424 | 0.281827092 |
| 0.250000000 | 0.000000000 | 0.000000000 |
| 0.416740000 | 0.083520003 | 0.094250001 |
| 0.334443390 | 0.169283628 | 0.189392403 |
| 0.248486966 | 0.997622967 | 0.281339973 |
| 0.500000000 | 0.000000000 | 0.000000000 |
| 0.666630030 | 0.083310001 | 0.093910001 |
| 0.581623614 | 0.168800905 | 0.188575283 |
| 0.499851555 | 0.999786198 | 0.281896025 |
| 0.750000000 | 0.000000000 | 0.000000000 |
| 0.916689992 | 0.083310001 | 0.093910001 |
| 0.831942737 | 0.165958524 | 0.186237767 |
| 0.751724303 | 0.004082308 | 0.280563623 |
| 0.000000000 | 0.250000000 | 0.000000000 |
| 0.167219996 | 0.333609998 | 0.094010003 |
| 0.085006423 | 0.417343855 | 0.187655449 |
| 0.993166566 | 0.246525720 | 0.280216128 |
| 0.250000000 | 0.250000000 | 0.000000000 |
| 0.416880012 | 0.333759993 | 0.094740003 |
| 0.337657005 | 0.418733686 | 0.189423859 |
| 0.247982919 | 0.248951048 | 0.283469886 |
| 0.500000000 | 0.250000000 | 0.000000000 |
| 0.666390002 | 0.333609998 | 0.094010003 |
| 0.582684219 | 0.418591201 | 0.192752168 |
| 0.499515861 | 0.243649587 | 0.287209541 |
| 0.750000000 | 0.250000000 | 0.000000000 |
| 0.916689992 | 0.333370000 | 0.093910001 |

|             |             |             |
|-------------|-------------|-------------|
| 0.831932604 | 0.417288810 | 0.187789068 |
| 0.751746714 | 0.247619703 | 0.280571014 |
| 0.000000000 | 0.500000000 | 0.000000000 |
| 0.166779995 | 0.583260000 | 0.094250001 |
| 0.082948901 | 0.666169941 | 0.187427461 |
| 0.003134850 | 0.499691129 | 0.281862319 |
| 0.250000000 | 0.500000000 | 0.000000000 |
| 0.416880012 | 0.583119988 | 0.094740003 |
| 0.334318519 | 0.664923191 | 0.189390793 |
| 0.248067394 | 0.498889804 | 0.283419579 |
| 0.500000000 | 0.500000000 | 0.000000000 |
| 0.666239977 | 0.583119988 | 0.094740003 |
| 0.582659304 | 0.664048135 | 0.192743883 |
| 0.750000000 | 0.500000000 | 0.000000000 |
| 0.916480005 | 0.583260000 | 0.094250001 |
| 0.831084788 | 0.665516436 | 0.189530015 |
| 0.759625494 | 0.501239061 | 0.285011441 |
| 0.000000000 | 0.750000000 | 0.000000000 |
| 0.166669995 | 0.833329976 | 0.094530001 |
| 0.082948595 | 0.916769445 | 0.187400624 |
| 0.006288119 | 0.753117502 | 0.281790286 |
| 0.250000000 | 0.750000000 | 0.000000000 |
| 0.416740000 | 0.833220005 | 0.094250001 |
| 0.334088922 | 0.917007983 | 0.187295333 |
| 0.248548210 | 0.750894964 | 0.281322718 |
| 0.500000000 | 0.750000000 | 0.000000000 |
| 0.666390002 | 0.832780004 | 0.094010003 |
| 0.581600964 | 0.912757814 | 0.188564375 |
| 0.499298155 | 0.755430043 | 0.287162095 |
| 0.750000000 | 0.750000000 | 0.000000000 |

|             |             |             |
|-------------|-------------|-------------|
| 0.916480005 | 0.833220005 | 0.094250001 |
| 0.831887782 | 0.914524913 | 0.187772393 |
| 0.759571314 | 0.758301318 | 0.284983277 |
| 0.551745296 | 0.525962532 | 0.390690237 |
| 0.768302441 | 0.496681720 | 0.377725780 |
| 0.275992543 | 0.387910128 | 0.358690202 |
| 0.768409908 | 0.771731555 | 0.377694100 |
| 0.475338787 | 0.259288639 | 0.378748655 |
| 0.475095332 | 0.716021597 | 0.378729671 |
| 0.744242489 | 0.391854584 | 0.388097584 |
| 0.744693041 | 0.852759361 | 0.388035357 |
| 0.184154242 | 0.342035234 | 0.385109186 |
| 0.369958550 | 0.180585936 | 0.389022231 |
| 0.369674921 | 0.689248562 | 0.389007777 |
| 0.500971317 | 0.500667989 | 0.485799998 |

Ce(OH)<sub>5</sub>@Ni-H<sub>2</sub>O

1.0

|               |              |               |
|---------------|--------------|---------------|
| 10.0322999954 | 0.0000000000 | 0.0000000000  |
| -5.0161499977 | 8.6882266544 | 0.0000000000  |
| 0.0000000000  | 0.0000000000 | 21.1434993744 |

|    |    |   |   |
|----|----|---|---|
| Ni | Ce | O | H |
| 63 | 1  | 6 | 7 |

Direct

|             |             |             |
|-------------|-------------|-------------|
| 0.000000000 | 0.000000000 | 0.000000000 |
| 0.166779995 | 0.083520003 | 0.094250001 |
| 0.084542520 | 0.167515457 | 0.187495172 |
| 0.002693276 | 0.003407351 | 0.281976223 |
| 0.250000000 | 0.000000000 | 0.000000000 |
| 0.416740000 | 0.083520003 | 0.094250001 |

|             |             |             |
|-------------|-------------|-------------|
| 0.333964765 | 0.169527084 | 0.189530000 |
| 0.247653812 | 0.997045517 | 0.281181574 |
| 0.500000000 | 0.000000000 | 0.000000000 |
| 0.666630030 | 0.083310001 | 0.093910001 |
| 0.581153631 | 0.168753102 | 0.188567817 |
| 0.498870432 | 0.999354601 | 0.281901658 |
| 0.750000000 | 0.000000000 | 0.000000000 |
| 0.916689992 | 0.083310001 | 0.093910001 |
| 0.831136107 | 0.165792331 | 0.186082095 |
| 0.750492215 | 0.003932266 | 0.280244380 |
| 0.000000000 | 0.250000000 | 0.000000000 |
| 0.167219996 | 0.333609998 | 0.094010003 |
| 0.084456757 | 0.417144239 | 0.187532261 |
| 0.991342366 | 0.245765790 | 0.279572397 |
| 0.250000000 | 0.250000000 | 0.000000000 |
| 0.416880012 | 0.333759993 | 0.094740003 |
| 0.337235957 | 0.418717176 | 0.189692661 |
| 0.247748673 | 0.248705208 | 0.283561200 |
| 0.500000000 | 0.250000000 | 0.000000000 |
| 0.666390002 | 0.333609998 | 0.094010003 |
| 0.582215548 | 0.418536127 | 0.193073705 |
| 0.498514563 | 0.242571011 | 0.287494510 |
| 0.750000000 | 0.250000000 | 0.000000000 |
| 0.916689992 | 0.333370000 | 0.093910001 |
| 0.831524611 | 0.417101622 | 0.187614933 |
| 0.750985920 | 0.247613102 | 0.280365527 |
| 0.000000000 | 0.500000000 | 0.000000000 |
| 0.166779995 | 0.583260000 | 0.094250001 |
| 0.082300864 | 0.665837586 | 0.187312990 |
| 0.002397635 | 0.499497086 | 0.281919658 |

|             |             |             |
|-------------|-------------|-------------|
| 0.250000000 | 0.500000000 | 0.000000000 |
| 0.416880012 | 0.583119988 | 0.094740003 |
| 0.333941430 | 0.664510965 | 0.189519107 |
| 0.246996805 | 0.498577833 | 0.283606350 |
| 0.500000000 | 0.500000000 | 0.000000000 |
| 0.666239977 | 0.583119988 | 0.094740003 |
| 0.582288921 | 0.663963735 | 0.193179324 |
| 0.750000000 | 0.500000000 | 0.000000000 |
| 0.916480005 | 0.583260000 | 0.094250001 |
| 0.830502748 | 0.665583670 | 0.189492702 |
| 0.760494590 | 0.501936316 | 0.284660548 |
| 0.000000000 | 0.750000000 | 0.000000000 |
| 0.166669995 | 0.833329976 | 0.094530001 |
| 0.082296632 | 0.916734159 | 0.187379465 |
| 0.005372031 | 0.752974629 | 0.281611562 |
| 0.250000000 | 0.750000000 | 0.000000000 |
| 0.416740000 | 0.833220005 | 0.094250001 |
| 0.333777249 | 0.917045295 | 0.187173128 |
| 0.247383967 | 0.751010597 | 0.281096816 |
| 0.500000000 | 0.750000000 | 0.000000000 |
| 0.666390002 | 0.832780004 | 0.094010003 |
| 0.580922723 | 0.912416458 | 0.188600793 |
| 0.497816533 | 0.755350709 | 0.287325770 |
| 0.750000000 | 0.750000000 | 0.000000000 |
| 0.916480005 | 0.833220005 | 0.094250001 |
| 0.831572235 | 0.914909601 | 0.187641889 |
| 0.760666013 | 0.759535015 | 0.285056680 |
| 0.540555477 | 0.519014418 | 0.382387280 |
| 0.771752954 | 0.493976563 | 0.377537131 |
| 0.258855313 | 0.378906608 | 0.360614985 |



|             |             |             |
|-------------|-------------|-------------|
| 0.770682037 | 0.782112777 | 0.378551096 |
| 0.471999943 | 0.247871593 | 0.380397201 |
| 0.469530642 | 0.721243143 | 0.379655093 |
| 0.703920901 | 0.618101597 | 0.491055340 |
| 0.741808474 | 0.386180073 | 0.384869963 |
| 0.734830379 | 0.855752945 | 0.384990007 |
| 0.159091607 | 0.328367919 | 0.381609082 |
| 0.369095147 | 0.161154822 | 0.388318002 |
| 0.365690470 | 0.702615976 | 0.387514830 |
| 0.769564509 | 0.710238874 | 0.464956194 |
| 0.760027707 | 0.561787844 | 0.489152223 |

Ce(OH)<sub>5</sub>@Ni-OH

1.0

|               |              |               |
|---------------|--------------|---------------|
| 10.0322999954 | 0.0000000000 | 0.0000000000  |
| -5.0161499977 | 8.6882266544 | 0.0000000000  |
| 0.0000000000  | 0.0000000000 | 21.1434993744 |

|    |    |   |   |
|----|----|---|---|
| Ni | Ce | O | H |
| 63 | 1  | 6 | 6 |

Direct

|             |             |             |
|-------------|-------------|-------------|
| 0.000000000 | 0.000000000 | 0.000000000 |
| 0.166779995 | 0.083520003 | 0.094250001 |
| 0.084908560 | 0.167566657 | 0.187756658 |
| 0.002015178 | 0.002895429 | 0.282058448 |
| 0.250000000 | 0.000000000 | 0.000000000 |
| 0.416740000 | 0.083520003 | 0.094250001 |
| 0.334016800 | 0.169605076 | 0.189460069 |
| 0.247641176 | 0.997314930 | 0.281151056 |
| 0.500000000 | 0.000000000 | 0.000000000 |
| 0.666630030 | 0.083310001 | 0.093910001 |

|             |             |             |
|-------------|-------------|-------------|
| 0.581555486 | 0.168962434 | 0.188465878 |
| 0.499353319 | 0.000366890 | 0.281607866 |
| 0.750000000 | 0.000000000 | 0.000000000 |
| 0.916689992 | 0.083310001 | 0.093910001 |
| 0.831995845 | 0.166181177 | 0.186237872 |
| 0.751471758 | 0.004581157 | 0.280426681 |
| 0.000000000 | 0.250000000 | 0.000000000 |
| 0.167219996 | 0.333609998 | 0.094010003 |
| 0.084877051 | 0.417501301 | 0.187736198 |
| 0.992747247 | 0.246569499 | 0.280125082 |
| 0.250000000 | 0.250000000 | 0.000000000 |
| 0.416880012 | 0.333759993 | 0.094740003 |
| 0.337179124 | 0.418717682 | 0.189600706 |
| 0.247557759 | 0.248972401 | 0.284266442 |
| 0.500000000 | 0.250000000 | 0.000000000 |
| 0.666390002 | 0.333609998 | 0.094010003 |
| 0.582552612 | 0.418520778 | 0.192792818 |
| 0.497968972 | 0.242823333 | 0.287549466 |
| 0.750000000 | 0.250000000 | 0.000000000 |
| 0.916689992 | 0.333370000 | 0.093910001 |
| 0.831763983 | 0.417495072 | 0.187782288 |
| 0.751529515 | 0.247648835 | 0.280487269 |
| 0.000000000 | 0.500000000 | 0.000000000 |
| 0.166779995 | 0.583260000 | 0.094250001 |
| 0.082446650 | 0.666182756 | 0.187410057 |
| 0.002197000 | 0.499847442 | 0.282096565 |
| 0.250000000 | 0.500000000 | 0.000000000 |
| 0.416880012 | 0.583119988 | 0.094740003 |
| 0.334104687 | 0.665001273 | 0.189354777 |
| 0.248116553 | 0.500154078 | 0.284012198 |

|             |             |             |
|-------------|-------------|-------------|
| 0.500000000 | 0.500000000 | 0.000000000 |
| 0.666239977 | 0.583119988 | 0.094740003 |
| 0.582657635 | 0.664559007 | 0.192760572 |
| 0.750000000 | 0.500000000 | 0.000000000 |
| 0.916480005 | 0.583260000 | 0.094250001 |
| 0.830669165 | 0.665498257 | 0.189536199 |
| 0.758765697 | 0.500773728 | 0.285045475 |
| 0.000000000 | 0.750000000 | 0.000000000 |
| 0.166669995 | 0.833329976 | 0.094530001 |
| 0.082495689 | 0.916530907 | 0.187418252 |
| 0.005307807 | 0.752852559 | 0.281965017 |
| 0.250000000 | 0.750000000 | 0.000000000 |
| 0.416740000 | 0.833220005 | 0.094250001 |
| 0.333764166 | 0.917225659 | 0.187097922 |
| 0.247606039 | 0.751371562 | 0.281034350 |
| 0.500000000 | 0.750000000 | 0.000000000 |
| 0.666390002 | 0.832780004 | 0.094010003 |
| 0.581626892 | 0.913235247 | 0.188312948 |
| 0.498506993 | 0.756887257 | 0.287065774 |
| 0.750000000 | 0.750000000 | 0.000000000 |
| 0.916480005 | 0.833220005 | 0.094250001 |
| 0.831899703 | 0.914908707 | 0.187651530 |
| 0.758859575 | 0.758671999 | 0.284965008 |
| 0.543506145 | 0.523905814 | 0.407987207 |
| 0.768599570 | 0.496093303 | 0.375901908 |
| 0.269439638 | 0.386181921 | 0.358184278 |
| 0.770117164 | 0.775879681 | 0.375599504 |
| 0.472410977 | 0.252705485 | 0.377560109 |
| 0.474127918 | 0.724639356 | 0.377164304 |
| 0.491861880 | 0.502785385 | 0.508121669 |

|             |             |             |
|-------------|-------------|-------------|
| 0.742522299 | 0.390599281 | 0.386099935 |
| 0.745457888 | 0.856342196 | 0.385676265 |
| 0.175182119 | 0.339461952 | 0.383206666 |
| 0.372162342 | 0.166672736 | 0.389479786 |
| 0.374135137 | 0.710893035 | 0.389220804 |
| 0.492567003 | 0.519135892 | 0.553243816 |

CeO<sub>4</sub>@Ni-H<sub>Ni</sub>

1.0

|               |              |               |
|---------------|--------------|---------------|
| 10.0322999954 | 0.0000000000 | 0.0000000000  |
| -5.0161499977 | 8.6882266544 | 0.0000000000  |
| 0.0000000000  | 0.0000000000 | 21.1434993744 |

|    |    |   |   |
|----|----|---|---|
| Ni | Ce | O | H |
| 63 | 1  | 4 | 1 |

Direct

|             |             |             |
|-------------|-------------|-------------|
| 0.000000000 | 0.000000000 | 0.000000000 |
| 0.166779995 | 0.083520003 | 0.094250001 |
| 0.085063584 | 0.167810082 | 0.187667027 |
| 0.998551667 | 0.004030565 | 0.280662626 |
| 0.250000000 | 0.000000000 | 0.000000000 |
| 0.416740000 | 0.083520003 | 0.094250001 |
| 0.334598750 | 0.167459413 | 0.188950658 |
| 0.244465038 | 0.991411567 | 0.282226950 |
| 0.500000000 | 0.000000000 | 0.000000000 |
| 0.666630030 | 0.083310001 | 0.093910001 |
| 0.583014846 | 0.167506158 | 0.189013928 |
| 0.496761888 | 0.990559816 | 0.281155348 |
| 0.750000000 | 0.000000000 | 0.000000000 |
| 0.916689992 | 0.083310001 | 0.093910001 |
| 0.832356095 | 0.167722464 | 0.188634068 |

|             |             |             |
|-------------|-------------|-------------|
| 0.749374688 | 0.000764526 | 0.281761348 |
| 0.000000000 | 0.250000000 | 0.000000000 |
| 0.167219996 | 0.333609998 | 0.094010003 |
| 0.087313458 | 0.417667568 | 0.188436329 |
| 0.999564350 | 0.249728858 | 0.281636178 |
| 0.250000000 | 0.250000000 | 0.000000000 |
| 0.416880012 | 0.333759993 | 0.094740003 |
| 0.335620701 | 0.416670620 | 0.190658346 |
| 0.240391329 | 0.242012694 | 0.284462392 |
| 0.500000000 | 0.250000000 | 0.000000000 |
| 0.666390002 | 0.333609998 | 0.094010003 |
| 0.582396209 | 0.415883869 | 0.190759510 |
| 0.491771311 | 0.235909626 | 0.288052648 |
| 0.750000000 | 0.250000000 | 0.000000000 |
| 0.916689992 | 0.333370000 | 0.093910001 |
| 0.832798958 | 0.415247738 | 0.187676817 |
| 0.752040207 | 0.245720729 | 0.286557496 |
| 0.000000000 | 0.500000000 | 0.000000000 |
| 0.166779995 | 0.583260000 | 0.094250001 |
| 0.081538357 | 0.667384326 | 0.188953981 |
| 0.008891881 | 0.499299437 | 0.281247526 |
| 0.250000000 | 0.500000000 | 0.000000000 |
| 0.416880012 | 0.583119988 | 0.094740003 |
| 0.333827376 | 0.665426910 | 0.188820526 |
| 0.251014024 | 0.499628007 | 0.287139148 |
| 0.500000000 | 0.500000000 | 0.000000000 |
| 0.666239977 | 0.583119988 | 0.094740003 |
| 0.582126379 | 0.663382828 | 0.190007344 |
| 0.750000000 | 0.500000000 | 0.000000000 |
| 0.916480005 | 0.583260000 | 0.094250001 |

|             |             |             |
|-------------|-------------|-------------|
| 0.832135022 | 0.664970636 | 0.187795192 |
| 0.761292756 | 0.502047598 | 0.282731861 |
| 0.000000000 | 0.750000000 | 0.000000000 |
| 0.166669995 | 0.833329976 | 0.094530001 |
| 0.081949048 | 0.914428711 | 0.188703731 |
| 0.998639524 | 0.750211060 | 0.289531291 |
| 0.250000000 | 0.750000000 | 0.000000000 |
| 0.416740000 | 0.833220005 | 0.094250001 |
| 0.333259583 | 0.916503429 | 0.187620386 |
| 0.245527968 | 0.751378834 | 0.282011420 |
| 0.500000000 | 0.750000000 | 0.000000000 |
| 0.666390002 | 0.832780004 | 0.094010003 |
| 0.582512558 | 0.913153708 | 0.188126847 |
| 0.503194809 | 0.751838982 | 0.286274880 |
| 0.750000000 | 0.750000000 | 0.000000000 |
| 0.916480005 | 0.833220005 | 0.094250001 |
| 0.831982017 | 0.916202247 | 0.186818391 |
| 0.755130470 | 0.758734465 | 0.281668425 |
| 0.551483929 | 0.494065642 | 0.379743367 |
| 0.410688132 | 0.596500158 | 0.348463833 |
| 0.812498152 | 0.666890264 | 0.345988661 |
| 0.364457399 | 0.259530932 | 0.353218347 |
| 0.670875728 | 0.334463060 | 0.342969060 |
| 0.701584399 | 0.841594160 | 0.331149161 |

CeO<sub>4</sub>@Ni-H<sub>Ce</sub>

1.0

|               |              |               |
|---------------|--------------|---------------|
| 10.0322999954 | 0.000000000  | 0.000000000   |
| -5.0161499977 | 8.6882266544 | 0.000000000   |
| 0.000000000   | 0.000000000  | 21.1434993744 |

|    |    |   |   |
|----|----|---|---|
| Ni | Ce | O | H |
| 63 | 1  | 4 | 1 |

Direct

|             |             |             |
|-------------|-------------|-------------|
| 0.000000000 | 0.000000000 | 0.000000000 |
| 0.166779995 | 0.083520003 | 0.094250001 |
| 0.085150532 | 0.168296933 | 0.187577188 |
| 0.998195469 | 0.004660764 | 0.280837178 |
| 0.250000000 | 0.000000000 | 0.000000000 |
| 0.416740000 | 0.083520003 | 0.094250001 |
| 0.334475607 | 0.167572707 | 0.188875273 |
| 0.243631274 | 0.991308868 | 0.282020509 |
| 0.500000000 | 0.000000000 | 0.000000000 |
| 0.666630030 | 0.083310001 | 0.093910001 |
| 0.582915127 | 0.167795479 | 0.189050525 |
| 0.496738762 | 0.990920782 | 0.281240314 |
| 0.750000000 | 0.000000000 | 0.000000000 |
| 0.916689992 | 0.083310001 | 0.093910001 |
| 0.832535505 | 0.168178350 | 0.188593164 |
| 0.749867320 | 0.002161651 | 0.281471670 |
| 0.000000000 | 0.250000000 | 0.000000000 |
| 0.167219996 | 0.333609998 | 0.094010003 |
| 0.087783441 | 0.418444753 | 0.188537627 |
| 0.999875844 | 0.251048595 | 0.281646639 |
| 0.250000000 | 0.250000000 | 0.000000000 |
| 0.416880012 | 0.333759993 | 0.094740003 |
| 0.335885197 | 0.417288452 | 0.190358281 |
| 0.240323275 | 0.242933363 | 0.284238070 |
| 0.500000000 | 0.250000000 | 0.000000000 |
| 0.666390002 | 0.333609998 | 0.094010003 |
| 0.582398057 | 0.415958911 | 0.190506399 |

|             |             |             |
|-------------|-------------|-------------|
| 0.490786731 | 0.235448778 | 0.287910253 |
| 0.750000000 | 0.250000000 | 0.000000000 |
| 0.916689992 | 0.333370000 | 0.093910001 |
| 0.833206296 | 0.415617853 | 0.187690377 |
| 0.751687050 | 0.246869937 | 0.286658555 |
| 0.000000000 | 0.500000000 | 0.000000000 |
| 0.166779995 | 0.583260000 | 0.094250001 |
| 0.081346750 | 0.667799115 | 0.189045519 |
| 0.009688388 | 0.500605047 | 0.281387806 |
| 0.250000000 | 0.500000000 | 0.000000000 |
| 0.416880012 | 0.583119988 | 0.094740003 |
| 0.333953202 | 0.666049242 | 0.188908309 |
| 0.253728807 | 0.501038194 | 0.287633300 |
| 0.500000000 | 0.500000000 | 0.000000000 |
| 0.666239977 | 0.583119988 | 0.094740003 |
| 0.582219720 | 0.663811386 | 0.189859152 |
| 0.750000000 | 0.500000000 | 0.000000000 |
| 0.916480005 | 0.583260000 | 0.094250001 |
| 0.832039952 | 0.665344954 | 0.187780514 |
| 0.761663318 | 0.502173185 | 0.282234401 |
| 0.000000000 | 0.750000000 | 0.000000000 |
| 0.166669995 | 0.833329976 | 0.094530001 |
| 0.081691958 | 0.914716482 | 0.188737869 |
| 0.996739268 | 0.750008047 | 0.289807200 |
| 0.250000000 | 0.750000000 | 0.000000000 |
| 0.416740000 | 0.833220005 | 0.094250001 |
| 0.333244056 | 0.916823447 | 0.187600181 |
| 0.245375916 | 0.751860261 | 0.282193929 |
| 0.500000000 | 0.750000000 | 0.000000000 |
| 0.666390002 | 0.832780004 | 0.094010003 |



|             |             |             |
|-------------|-------------|-------------|
| 0.582759142 | 0.913761556 | 0.188213632 |
| 0.503463686 | 0.752871156 | 0.286211967 |
| 0.750000000 | 0.750000000 | 0.000000000 |
| 0.916480005 | 0.833220005 | 0.094250001 |
| 0.832145572 | 0.916765273 | 0.186842859 |
| 0.754248977 | 0.760772705 | 0.281489044 |
| 0.551011980 | 0.489076048 | 0.382364184 |
| 0.418645978 | 0.595373511 | 0.346067697 |
| 0.803281367 | 0.663891137 | 0.345315963 |
| 0.364750415 | 0.263082355 | 0.352072597 |
| 0.669602811 | 0.335233063 | 0.342184633 |
| 0.549369216 | 0.494199514 | 0.479459465 |

CeO<sub>4</sub>@Ni-H<sub>2</sub>O

1.0

|               |              |               |
|---------------|--------------|---------------|
| 10.0322999954 | 0.0000000000 | 0.0000000000  |
| -5.0161499977 | 8.6882266544 | 0.0000000000  |
| 0.0000000000  | 0.0000000000 | 21.1434993744 |

| Ni | Ce | O | H |
|----|----|---|---|
| 63 | 1  | 5 | 2 |

Direct

|             |             |             |
|-------------|-------------|-------------|
| 0.000000000 | 0.000000000 | 0.000000000 |
| 0.166779995 | 0.083520003 | 0.094250001 |
| 0.085084975 | 0.168356761 | 0.187467650 |
| 0.998014152 | 0.005369280 | 0.280747622 |
| 0.250000000 | 0.000000000 | 0.000000000 |
| 0.416740000 | 0.083520003 | 0.094250001 |
| 0.334721684 | 0.167955250 | 0.188819066 |
| 0.244920716 | 0.993095279 | 0.282775521 |
| 0.500000000 | 0.000000000 | 0.000000000 |

|             |             |             |
|-------------|-------------|-------------|
| 0.666630030 | 0.083310001 | 0.093910001 |
| 0.583373964 | 0.167920575 | 0.188910082 |
| 0.497143716 | 0.990643442 | 0.281234086 |
| 0.750000000 | 0.000000000 | 0.000000000 |
| 0.916689992 | 0.083310001 | 0.093910001 |
| 0.832481086 | 0.168054909 | 0.188635752 |
| 0.749490321 | 0.001502242 | 0.281570673 |
| 0.000000000 | 0.250000000 | 0.000000000 |
| 0.167219996 | 0.333609998 | 0.094010003 |
| 0.087479204 | 0.418241739 | 0.188366935 |
| 0.999581575 | 0.250952750 | 0.281654656 |
| 0.250000000 | 0.250000000 | 0.000000000 |
| 0.416880012 | 0.333759993 | 0.094740003 |
| 0.335994214 | 0.417574435 | 0.190529406 |
| 0.240127832 | 0.243223712 | 0.284128070 |
| 0.500000000 | 0.250000000 | 0.000000000 |
| 0.666390002 | 0.333609998 | 0.094010003 |
| 0.582800627 | 0.416418523 | 0.190729409 |
| 0.491627365 | 0.235645697 | 0.287401587 |
| 0.750000000 | 0.250000000 | 0.000000000 |
| 0.916689992 | 0.333370000 | 0.093910001 |
| 0.833225429 | 0.415615469 | 0.187649310 |
| 0.751842022 | 0.246711329 | 0.286704302 |
| 0.000000000 | 0.500000000 | 0.000000000 |
| 0.166779995 | 0.583260000 | 0.094250001 |
| 0.081516057 | 0.667913914 | 0.188956037 |
| 0.009591501 | 0.500573397 | 0.281311750 |
| 0.250000000 | 0.500000000 | 0.000000000 |
| 0.416880012 | 0.583119988 | 0.094740003 |
| 0.334098101 | 0.666264653 | 0.188823745 |

|             |             |             |
|-------------|-------------|-------------|
| 0.251676232 | 0.500507593 | 0.287191719 |
| 0.500000000 | 0.500000000 | 0.000000000 |
| 0.666239977 | 0.583119988 | 0.094740003 |
| 0.582571328 | 0.664024591 | 0.190129861 |
| 0.750000000 | 0.500000000 | 0.000000000 |
| 0.916480005 | 0.583260000 | 0.094250001 |
| 0.832343578 | 0.665535212 | 0.187750563 |
| 0.762720942 | 0.503031015 | 0.282444268 |
| 0.000000000 | 0.750000000 | 0.000000000 |
| 0.166669995 | 0.833329976 | 0.094530001 |
| 0.082299992 | 0.915091097 | 0.188945919 |
| 0.998789787 | 0.751254857 | 0.289980829 |
| 0.250000000 | 0.750000000 | 0.000000000 |
| 0.416740000 | 0.833220005 | 0.094250001 |
| 0.333200336 | 0.917241335 | 0.187692419 |
| 0.245467216 | 0.752415538 | 0.281964839 |
| 0.500000000 | 0.750000000 | 0.000000000 |
| 0.666390002 | 0.832780004 | 0.094010003 |
| 0.582763851 | 0.913649380 | 0.188195586 |
| 0.503451586 | 0.752089858 | 0.286435723 |
| 0.750000000 | 0.750000000 | 0.000000000 |
| 0.916480005 | 0.833220005 | 0.094250001 |
| 0.832244694 | 0.916728795 | 0.186831281 |
| 0.755702674 | 0.760610402 | 0.281681776 |
| 0.551028430 | 0.490501136 | 0.381605566 |
| 0.411007464 | 0.596808612 | 0.347164482 |
| 0.813120306 | 0.669126034 | 0.345445871 |
| 0.357023090 | 0.247510582 | 0.352587163 |
| 0.670077085 | 0.334966302 | 0.342593372 |
| 0.343742818 | 0.323680222 | 0.474008262 |

|             |             |             |
|-------------|-------------|-------------|
| 0.299307972 | 0.248609319 | 0.438622773 |
| 0.264710009 | 0.348915875 | 0.485087395 |

CeO<sub>4</sub>@Ni-OH

1.0

|               |              |               |
|---------------|--------------|---------------|
| 10.0322999954 | 0.0000000000 | 0.0000000000  |
| -5.0161499977 | 8.6882266544 | 0.0000000000  |
| 0.0000000000  | 0.0000000000 | 21.1434993744 |

|    |    |   |   |
|----|----|---|---|
| Ni | Ce | O | H |
| 63 | 1  | 5 | 1 |

Direct

|             |             |             |
|-------------|-------------|-------------|
| 0.000000000 | 0.000000000 | 0.000000000 |
| 0.166779995 | 0.083520003 | 0.094250001 |
| 0.085092820 | 0.167830586 | 0.187640518 |
| 0.998410940 | 0.003910083 | 0.280715466 |
| 0.250000000 | 0.000000000 | 0.000000000 |
| 0.416740000 | 0.083520003 | 0.094250001 |
| 0.334643811 | 0.167487368 | 0.188927293 |
| 0.244626954 | 0.991528153 | 0.282178789 |
| 0.500000000 | 0.000000000 | 0.000000000 |
| 0.666630030 | 0.083310001 | 0.093910001 |
| 0.582974970 | 0.167528629 | 0.189014032 |
| 0.496970057 | 0.990501821 | 0.281228572 |
| 0.750000000 | 0.000000000 | 0.000000000 |
| 0.916689992 | 0.083310001 | 0.093910001 |
| 0.832335889 | 0.167739421 | 0.188631013 |
| 0.749279618 | 0.000682046 | 0.281538248 |
| 0.000000000 | 0.250000000 | 0.000000000 |
| 0.167219996 | 0.333609998 | 0.094010003 |
| 0.087255552 | 0.417634547 | 0.188398257 |

|             |             |             |
|-------------|-------------|-------------|
| 0.999530137 | 0.249770075 | 0.281640440 |
| 0.250000000 | 0.250000000 | 0.000000000 |
| 0.416880012 | 0.333759993 | 0.094740003 |
| 0.335706234 | 0.416716069 | 0.190588266 |
| 0.240984663 | 0.242352337 | 0.284706801 |
| 0.500000000 | 0.250000000 | 0.000000000 |
| 0.666390002 | 0.333609998 | 0.094010003 |
| 0.582393527 | 0.415896833 | 0.190714672 |
| 0.492022038 | 0.236355364 | 0.288348973 |
| 0.750000000 | 0.250000000 | 0.000000000 |
| 0.916689992 | 0.333370000 | 0.093910001 |
| 0.832840562 | 0.415258467 | 0.187703744 |
| 0.751751900 | 0.246069893 | 0.286710292 |
| 0.000000000 | 0.500000000 | 0.000000000 |
| 0.166779995 | 0.583260000 | 0.094250001 |
| 0.081545383 | 0.667440116 | 0.188953742 |
| 0.008939813 | 0.499327719 | 0.281285495 |
| 0.250000000 | 0.500000000 | 0.000000000 |
| 0.416880012 | 0.583119988 | 0.094740003 |
| 0.333778024 | 0.665431380 | 0.188818127 |
| 0.252015829 | 0.499915600 | 0.287527084 |
| 0.500000000 | 0.500000000 | 0.000000000 |
| 0.666239977 | 0.583119988 | 0.094740003 |
| 0.582168996 | 0.663476646 | 0.190083638 |
| 0.750000000 | 0.500000000 | 0.000000000 |
| 0.916480005 | 0.583260000 | 0.094250001 |
| 0.832157731 | 0.665005922 | 0.187781915 |
| 0.761448622 | 0.502030194 | 0.282976270 |
| 0.000000000 | 0.750000000 | 0.000000000 |
| 0.166669995 | 0.833329976 | 0.094530001 |

|             |             |             |
|-------------|-------------|-------------|
| 0.082032420 | 0.914463878 | 0.188710302 |
| 0.998354316 | 0.750137269 | 0.289702505 |
| 0.250000000 | 0.750000000 | 0.000000000 |
| 0.416740000 | 0.833220005 | 0.094250001 |
| 0.333289564 | 0.916589200 | 0.187608674 |
| 0.245574549 | 0.751454175 | 0.282010138 |
| 0.500000000 | 0.750000000 | 0.000000000 |
| 0.666390002 | 0.832780004 | 0.094010003 |
| 0.582545161 | 0.913193762 | 0.188176364 |
| 0.502904534 | 0.750949502 | 0.286504865 |
| 0.750000000 | 0.750000000 | 0.000000000 |
| 0.916480005 | 0.833220005 | 0.094250001 |
| 0.832011998 | 0.916261375 | 0.186895236 |
| 0.755033016 | 0.759055436 | 0.281837225 |
| 0.546568215 | 0.488498539 | 0.387515098 |
| 0.413145095 | 0.596536517 | 0.347817868 |
| 0.809154689 | 0.666091263 | 0.345431924 |
| 0.366542041 | 0.262642741 | 0.352501810 |
| 0.670350850 | 0.335342646 | 0.342557162 |
| 0.532078028 | 0.465603858 | 0.488797128 |
| 0.521774709 | 0.380670249 | 0.514574945 |

H<sub>6</sub>Ce@Ni-Volmer-IS

1.0

|               |              |               |
|---------------|--------------|---------------|
| 10.0322999954 | 0.0000000000 | 0.0000000000  |
| -5.0161499977 | 8.6882266544 | 0.0000000000  |
| 0.0000000000  | 0.0000000000 | 21.1434993744 |

|    |    |   |   |
|----|----|---|---|
| Ni | Ce | H | O |
| 63 | 1  | 8 | 1 |

Direct

|             |             |             |
|-------------|-------------|-------------|
| 0.000000000 | 0.000000000 | 0.000000000 |
| 0.166779995 | 0.083520003 | 0.094250001 |
| 0.083861254 | 0.168027803 | 0.187617213 |
| 0.000242910 | 0.001419421 | 0.282418847 |
| 0.250000000 | 0.000000000 | 0.000000000 |
| 0.416740000 | 0.083520003 | 0.094250001 |
| 0.333625346 | 0.168227032 | 0.188255176 |
| 0.249338686 | 0.999000371 | 0.283577383 |
| 0.500000000 | 0.000000000 | 0.000000000 |
| 0.666630030 | 0.083310001 | 0.093910001 |
| 0.583625317 | 0.166933373 | 0.187349558 |
| 0.500093400 | 0.998477340 | 0.282167435 |
| 0.750000000 | 0.000000000 | 0.000000000 |
| 0.916689992 | 0.083310001 | 0.093910001 |
| 0.833823025 | 0.166987017 | 0.188565955 |
| 0.751217067 | 0.000943441 | 0.283147722 |
| 0.000000000 | 0.250000000 | 0.000000000 |
| 0.167219996 | 0.333609998 | 0.094010003 |
| 0.084753849 | 0.417439491 | 0.188232437 |
| 0.999047160 | 0.248953715 | 0.283342600 |
| 0.250000000 | 0.250000000 | 0.000000000 |
| 0.416880012 | 0.333759993 | 0.094740003 |
| 0.335445315 | 0.418842226 | 0.190900549 |
| 0.248808786 | 0.247023791 | 0.283756435 |
| 0.500000000 | 0.250000000 | 0.000000000 |
| 0.666390002 | 0.333609998 | 0.094010003 |
| 0.581348836 | 0.417534649 | 0.189729556 |
| 0.498071879 | 0.244528264 | 0.283295900 |
| 0.750000000 | 0.250000000 | 0.000000000 |
| 0.916689992 | 0.333370000 | 0.093910001 |

|             |             |             |
|-------------|-------------|-------------|
| 0.831841707 | 0.415508389 | 0.186994553 |
| 0.749339342 | 0.248414904 | 0.282609493 |
| 0.000000000 | 0.500000000 | 0.000000000 |
| 0.166779995 | 0.583260000 | 0.094250001 |
| 0.082898214 | 0.665936887 | 0.187903881 |
| 0.992693901 | 0.496126592 | 0.281895548 |
| 0.250000000 | 0.500000000 | 0.000000000 |
| 0.416880012 | 0.583119988 | 0.094740003 |
| 0.334587902 | 0.666050792 | 0.188858122 |
| 0.246100292 | 0.502829731 | 0.287530631 |
| 0.500000000 | 0.500000000 | 0.000000000 |
| 0.666239977 | 0.583119988 | 0.094740003 |
| 0.582208991 | 0.663631082 | 0.189757764 |
| 0.750000000 | 0.500000000 | 0.000000000 |
| 0.916480005 | 0.583260000 | 0.094250001 |
| 0.831892014 | 0.665725768 | 0.188134789 |
| 0.751856625 | 0.500635684 | 0.282738328 |
| 0.000000000 | 0.750000000 | 0.000000000 |
| 0.166669995 | 0.833329976 | 0.094530001 |
| 0.083098263 | 0.916743875 | 0.188150018 |
| 0.000964348 | 0.751040459 | 0.283614218 |
| 0.250000000 | 0.750000000 | 0.000000000 |
| 0.416740000 | 0.833220005 | 0.094250001 |
| 0.333326429 | 0.916434765 | 0.188140303 |
| 0.247829571 | 0.752333760 | 0.283511013 |
| 0.500000000 | 0.750000000 | 0.000000000 |
| 0.666390002 | 0.832780004 | 0.094010003 |
| 0.583707035 | 0.916141927 | 0.187703565 |
| 0.502298534 | 0.753149688 | 0.283329666 |
| 0.750000000 | 0.750000000 | 0.000000000 |



|             |             |             |
|-------------|-------------|-------------|
| 0.916480005 | 0.833220005 | 0.094250001 |
| 0.832831025 | 0.916693568 | 0.187536523 |
| 0.755564809 | 0.752372622 | 0.283506423 |
| 0.508300304 | 0.496159911 | 0.363832831 |
| 0.376085609 | 0.639214158 | 0.333195120 |
| 0.825153291 | 0.661046922 | 0.327878624 |
| 0.338021874 | 0.174591422 | 0.328229964 |
| 0.176951006 | 0.335421354 | 0.327530056 |
| 0.665928662 | 0.826580405 | 0.326513320 |
| 0.663142860 | 0.336283326 | 0.325936258 |
| 0.148631498 | 0.581259429 | 0.324770659 |
| 0.544202507 | 0.504532039 | 0.510301530 |
| 0.527382791 | 0.500066996 | 0.465083659 |

H<sub>6</sub>Ce@Ni-Volmer-TS

1.0

|               |              |               |
|---------------|--------------|---------------|
| 10.0322999954 | 0.0000000000 | 0.0000000000  |
| -5.0161499977 | 8.6882266544 | 0.0000000000  |
| 0.0000000000  | 0.0000000000 | 21.1434993744 |

|    |    |   |   |
|----|----|---|---|
| Ni | Ce | H | O |
| 63 | 1  | 8 | 1 |

Direct

|             |             |             |
|-------------|-------------|-------------|
| 0.000000000 | 0.000000000 | 0.000000000 |
| 0.166779995 | 0.083520003 | 0.094250001 |
| 0.083176024 | 0.167028725 | 0.187625632 |
| 0.998688221 | 0.000097752 | 0.282555282 |
| 0.250000000 | 0.000000000 | 0.000000000 |
| 0.416740000 | 0.083520003 | 0.094250001 |
| 0.334081560 | 0.168297872 | 0.188321158 |
| 0.248723358 | 0.998935223 | 0.283666760 |

|             |             |             |
|-------------|-------------|-------------|
| 0.500000000 | 0.000000000 | 0.000000000 |
| 0.666630030 | 0.083310001 | 0.093910001 |
| 0.584302306 | 0.168068916 | 0.187390909 |
| 0.500369251 | 0.000830889 | 0.282138944 |
| 0.750000000 | 0.000000000 | 0.000000000 |
| 0.916689992 | 0.083310001 | 0.093910001 |
| 0.833024561 | 0.166510314 | 0.188664049 |
| 0.750508726 | 0.001049955 | 0.283344418 |
| 0.000000000 | 0.250000000 | 0.000000000 |
| 0.167219996 | 0.333609998 | 0.094010003 |
| 0.082138956 | 0.415521145 | 0.187050968 |
| 0.998804390 | 0.249190420 | 0.283553898 |
| 0.250000000 | 0.250000000 | 0.000000000 |
| 0.416880012 | 0.333759993 | 0.094740003 |
| 0.336095423 | 0.417568803 | 0.189813897 |
| 0.246567100 | 0.244718298 | 0.284026504 |
| 0.500000000 | 0.250000000 | 0.000000000 |
| 0.666390002 | 0.333609998 | 0.094010003 |
| 0.582158446 | 0.418087333 | 0.189904138 |
| 0.498401135 | 0.245096043 | 0.283635199 |
| 0.750000000 | 0.250000000 | 0.000000000 |
| 0.916689992 | 0.333370000 | 0.093910001 |
| 0.832130313 | 0.415795654 | 0.187478423 |
| 0.750496030 | 0.249579534 | 0.283295423 |
| 0.000000000 | 0.500000000 | 0.000000000 |
| 0.166779995 | 0.583260000 | 0.094250001 |
| 0.082634397 | 0.666017294 | 0.187982872 |
| 0.001389972 | 0.499735892 | 0.282632411 |
| 0.250000000 | 0.500000000 | 0.000000000 |
| 0.416880012 | 0.583119988 | 0.094740003 |

|             |             |             |
|-------------|-------------|-------------|
| 0.333734572 | 0.665364802 | 0.188336879 |
| 0.247107401 | 0.499163836 | 0.281494379 |
| 0.500000000 | 0.500000000 | 0.000000000 |
| 0.666239977 | 0.583119988 | 0.094740003 |
| 0.580638468 | 0.663939178 | 0.190738872 |
| 0.750000000 | 0.500000000 | 0.000000000 |
| 0.916480005 | 0.583260000 | 0.094250001 |
| 0.831517220 | 0.665796161 | 0.188147038 |
| 0.754832029 | 0.501431704 | 0.283455521 |
| 0.000000000 | 0.750000000 | 0.000000000 |
| 0.166669995 | 0.833329976 | 0.094530001 |
| 0.082982838 | 0.916807830 | 0.188118592 |
| 0.000462651 | 0.750865400 | 0.283650428 |
| 0.250000000 | 0.750000000 | 0.000000000 |
| 0.416740000 | 0.833220005 | 0.094250001 |
| 0.334018707 | 0.917301059 | 0.187904164 |
| 0.246259838 | 0.751078427 | 0.281655490 |
| 0.500000000 | 0.750000000 | 0.000000000 |
| 0.666390002 | 0.832780004 | 0.094010003 |
| 0.583375454 | 0.916250587 | 0.187719166 |
| 0.495661676 | 0.751982450 | 0.284952253 |
| 0.750000000 | 0.750000000 | 0.000000000 |
| 0.916480005 | 0.833220005 | 0.094250001 |
| 0.832451284 | 0.916523278 | 0.187480301 |
| 0.753498971 | 0.752076983 | 0.283265591 |
| 0.505316556 | 0.504809856 | 0.360026181 |
| 0.325083137 | 0.673933089 | 0.362652123 |
| 0.825199127 | 0.662398636 | 0.327982754 |
| 0.338027239 | 0.175235972 | 0.328622282 |
| 0.176578745 | 0.338830173 | 0.326956332 |

|             |             |             |
|-------------|-------------|-------------|
| 0.665646732 | 0.827344477 | 0.325918853 |
| 0.662932754 | 0.337403029 | 0.326677531 |
| 0.410149425 | 0.748854160 | 0.380227596 |
| 0.577302516 | 0.693014026 | 0.480247319 |
| 0.541693568 | 0.602312922 | 0.453911215 |

H<sub>6</sub>Ce@Ni-Volmer-FS

1.0

|               |              |               |
|---------------|--------------|---------------|
| 10.0322999954 | 0.0000000000 | 0.0000000000  |
| -5.0161499977 | 8.6882266544 | 0.0000000000  |
| 0.0000000000  | 0.0000000000 | 21.1434993744 |

|    |    |   |   |
|----|----|---|---|
| Ni | Ce | H | O |
| 63 | 1  | 8 | 1 |

Direct

|             |             |             |
|-------------|-------------|-------------|
| 0.000000000 | 0.000000000 | 0.000000000 |
| 0.166779995 | 0.083520003 | 0.094250001 |
| 0.083602875 | 0.167349383 | 0.187671512 |
| 0.999343395 | 0.000743718 | 0.282397270 |
| 0.250000000 | 0.000000000 | 0.000000000 |
| 0.416740000 | 0.083520003 | 0.094250001 |
| 0.334136546 | 0.168076560 | 0.188364282 |
| 0.248839051 | 0.997619808 | 0.283704668 |
| 0.500000000 | 0.000000000 | 0.000000000 |
| 0.666630030 | 0.083310001 | 0.093910001 |
| 0.584120989 | 0.167220876 | 0.187612593 |
| 0.501366615 | 0.000072829 | 0.282587647 |
| 0.750000000 | 0.000000000 | 0.000000000 |
| 0.916689992 | 0.083310001 | 0.093910001 |
| 0.833606720 | 0.166979745 | 0.188628286 |
| 0.751371384 | 0.002375457 | 0.283147335 |

|             |             |             |
|-------------|-------------|-------------|
| 0.000000000 | 0.250000000 | 0.000000000 |
| 0.167219996 | 0.333609998 | 0.094010003 |
| 0.083579220 | 0.416256458 | 0.187591001 |
| 0.999115467 | 0.249800578 | 0.283300996 |
| 0.250000000 | 0.250000000 | 0.000000000 |
| 0.416880012 | 0.333759993 | 0.094740003 |
| 0.335939825 | 0.417746872 | 0.189940363 |
| 0.247173548 | 0.245157078 | 0.284036875 |
| 0.500000000 | 0.250000000 | 0.000000000 |
| 0.666390002 | 0.333609998 | 0.094010003 |
| 0.582228839 | 0.417545795 | 0.190184534 |
| 0.498439133 | 0.243386522 | 0.284004152 |
| 0.750000000 | 0.250000000 | 0.000000000 |
| 0.916689992 | 0.333370000 | 0.093910001 |
| 0.832941592 | 0.416148216 | 0.187637582 |
| 0.750763714 | 0.249583915 | 0.283320338 |
| 0.000000000 | 0.500000000 | 0.000000000 |
| 0.166779995 | 0.583260000 | 0.094250001 |
| 0.083281271 | 0.666369319 | 0.188182533 |
| 0.999880135 | 0.498950154 | 0.282449573 |
| 0.250000000 | 0.500000000 | 0.000000000 |
| 0.416880012 | 0.583119988 | 0.094740003 |
| 0.334011137 | 0.666001916 | 0.188179359 |
| 0.247844920 | 0.501628041 | 0.283797175 |
| 0.500000000 | 0.500000000 | 0.000000000 |
| 0.666239977 | 0.583119988 | 0.094740003 |
| 0.582158804 | 0.663954198 | 0.189898729 |
| 0.750000000 | 0.500000000 | 0.000000000 |
| 0.916480005 | 0.583260000 | 0.094250001 |
| 0.831998765 | 0.665729105 | 0.188298032 |

|             |             |             |
|-------------|-------------|-------------|
| 0.754907966 | 0.501526654 | 0.284063429 |
| 0.000000000 | 0.750000000 | 0.000000000 |
| 0.166669995 | 0.833329976 | 0.094530001 |
| 0.083137229 | 0.916792154 | 0.188201636 |
| 0.002362809 | 0.751189590 | 0.283655852 |
| 0.250000000 | 0.750000000 | 0.000000000 |
| 0.416740000 | 0.833220005 | 0.094250001 |
| 0.333859801 | 0.916995347 | 0.188146606 |
| 0.248666257 | 0.751616478 | 0.283625931 |
| 0.500000000 | 0.750000000 | 0.000000000 |
| 0.666390002 | 0.832780004 | 0.094010003 |
| 0.584170997 | 0.916893303 | 0.187461391 |
| 0.498477787 | 0.753594518 | 0.283187360 |
| 0.750000000 | 0.750000000 | 0.000000000 |
| 0.916480005 | 0.833220005 | 0.094250001 |
| 0.832721293 | 0.916542113 | 0.187616482 |
| 0.754782319 | 0.752461731 | 0.283805996 |
| 0.500521481 | 0.501264751 | 0.345479012 |
| 0.333305746 | 0.665085316 | 0.326804876 |
| 0.828423500 | 0.664311767 | 0.328249007 |
| 0.336509138 | 0.172797397 | 0.328348100 |
| 0.173226804 | 0.336802840 | 0.326707363 |
| 0.667626023 | 0.831706166 | 0.324644953 |
| 0.663397014 | 0.336518317 | 0.326878786 |
| 0.429349869 | 0.716800988 | 0.423157454 |
| 0.604030192 | 0.797053337 | 0.418236822 |
| 0.516322255 | 0.704170465 | 0.436141372 |

H<sub>6</sub>Ce@Ni-Heyrovsky-IS

1.0

|               |              |               |
|---------------|--------------|---------------|
| 10.0322999954 | 0.0000000000 | 0.0000000000  |
| -5.0161499977 | 8.6882266544 | 0.0000000000  |
| 0.0000000000  | 0.0000000000 | 21.1434993744 |

|    |    |   |   |
|----|----|---|---|
| Ni | Ce | H | O |
| 63 | 1  | 9 | 1 |

Direct

|              |              |              |
|--------------|--------------|--------------|
| 0.0000000000 | 0.0000000000 | 0.0000000000 |
| 0.166779995  | 0.083520003  | 0.094250001  |
| 0.083958708  | 0.168068662  | 0.187699392  |
| 0.000794327  | 0.001460208  | 0.282389343  |
| 0.250000000  | 0.000000000  | 0.000000000  |
| 0.416740000  | 0.083520003  | 0.094250001  |
| 0.333533168  | 0.167935789  | 0.188339889  |
| 0.248803392  | 0.997642159  | 0.283766329  |
| 0.500000000  | 0.000000000  | 0.000000000  |
| 0.666630030  | 0.083310001  | 0.093910001  |
| 0.582960188  | 0.166437238  | 0.187570751  |
| 0.500056982  | 0.998273790  | 0.282300353  |
| 0.750000000  | 0.000000000  | 0.000000000  |
| 0.916689992  | 0.083310001  | 0.093910001  |
| 0.833688557  | 0.167213812  | 0.188455254  |
| 0.752065063  | 0.002282779  | 0.283087611  |
| 0.000000000  | 0.250000000  | 0.000000000  |
| 0.167219996  | 0.333609998  | 0.094010003  |
| 0.083005317  | 0.416729480  | 0.187696338  |
| 0.997919559  | 0.248432398  | 0.283349514  |
| 0.250000000  | 0.250000000  | 0.000000000  |
| 0.416880012  | 0.333759993  | 0.094740003  |
| 0.335116535  | 0.419175744  | 0.191178486  |
| 0.248092771  | 0.246570513  | 0.284137040  |

|             |             |             |
|-------------|-------------|-------------|
| 0.500000000 | 0.250000000 | 0.000000000 |
| 0.666390002 | 0.333609998 | 0.094010003 |
| 0.581012905 | 0.416839242 | 0.189871937 |
| 0.497529238 | 0.243176863 | 0.284041166 |
| 0.750000000 | 0.250000000 | 0.000000000 |
| 0.916689992 | 0.333370000 | 0.093910001 |
| 0.831116498 | 0.415363461 | 0.187072635 |
| 0.748825252 | 0.248040274 | 0.282825142 |
| 0.000000000 | 0.500000000 | 0.000000000 |
| 0.166779995 | 0.583260000 | 0.094250001 |
| 0.083001114 | 0.665870309 | 0.188124433 |
| 0.991147339 | 0.494441748 | 0.281853110 |
| 0.250000000 | 0.500000000 | 0.000000000 |
| 0.416880012 | 0.583119988 | 0.094740003 |
| 0.334572375 | 0.666190684 | 0.188665152 |
| 0.242232487 | 0.501566947 | 0.286740422 |
| 0.500000000 | 0.500000000 | 0.000000000 |
| 0.666239977 | 0.583119988 | 0.094740003 |
| 0.583005428 | 0.663799465 | 0.189455718 |
| 0.750000000 | 0.500000000 | 0.000000000 |
| 0.916480005 | 0.583260000 | 0.094250001 |
| 0.832097530 | 0.665612876 | 0.188217863 |
| 0.752294242 | 0.500471473 | 0.283207297 |
| 0.000000000 | 0.750000000 | 0.000000000 |
| 0.166669995 | 0.833329976 | 0.094530001 |
| 0.083267257 | 0.916511416 | 0.188272446 |
| 0.002054744 | 0.750951052 | 0.283682913 |
| 0.250000000 | 0.750000000 | 0.000000000 |
| 0.416740000 | 0.833220005 | 0.094250001 |
| 0.332256228 | 0.915220022 | 0.188598633 |



|             |             |             |
|-------------|-------------|-------------|
| 0.248609945 | 0.750751197 | 0.285653919 |
| 0.500000000 | 0.750000000 | 0.000000000 |
| 0.666390002 | 0.832780004 | 0.094010003 |
| 0.584297717 | 0.917595148 | 0.187053114 |
| 0.506226361 | 0.755656958 | 0.281834871 |
| 0.750000000 | 0.750000000 | 0.000000000 |
| 0.916480005 | 0.833220005 | 0.094250001 |
| 0.833140314 | 0.916783988 | 0.187638968 |
| 0.757203996 | 0.753961444 | 0.283998162 |
| 0.499851555 | 0.500840127 | 0.345202982 |
| 0.356629401 | 0.680331528 | 0.324655652 |
| 0.827704728 | 0.662557840 | 0.327910334 |
| 0.335672230 | 0.171384111 | 0.328283519 |
| 0.173620731 | 0.334225148 | 0.327370226 |
| 0.667315960 | 0.828955770 | 0.326820225 |
| 0.662902534 | 0.336070418 | 0.326481164 |
| 0.139770880 | 0.581335902 | 0.326629311 |
| 0.383374512 | 0.677175403 | 0.427910149 |
| 0.248424172 | 0.515960753 | 0.415565550 |
| 0.349224627 | 0.568930149 | 0.436865836 |

H<sub>6</sub>Ce@Ni-Heyrovsky-TS

1.0

|               |              |               |
|---------------|--------------|---------------|
| 10.0322999954 | 0.0000000000 | 0.0000000000  |
| -5.0161499977 | 8.6882266544 | 0.0000000000  |
| 0.0000000000  | 0.0000000000 | 21.1434993744 |

| Ni | Ce | H | O |
|----|----|---|---|
| 63 | 1  | 9 | 1 |

Direct

|             |             |             |
|-------------|-------------|-------------|
| 0.000000000 | 0.000000000 | 0.000000000 |
|-------------|-------------|-------------|

|             |             |             |
|-------------|-------------|-------------|
| 0.166779995 | 0.083520003 | 0.094250001 |
| 0.083547615 | 0.168736577 | 0.187572733 |
| 0.999323368 | 0.001161791 | 0.282615215 |
| 0.250000000 | 0.000000000 | 0.000000000 |
| 0.416740000 | 0.083520003 | 0.094250001 |
| 0.333470613 | 0.168181032 | 0.187990248 |
| 0.248782933 | 0.999082267 | 0.283616334 |
| 0.500000000 | 0.000000000 | 0.000000000 |
| 0.666630030 | 0.083310001 | 0.093910001 |
| 0.582619965 | 0.167071253 | 0.187450588 |
| 0.500033081 | 0.999169588 | 0.282108963 |
| 0.750000000 | 0.000000000 | 0.000000000 |
| 0.916689992 | 0.083310001 | 0.093910001 |
| 0.832620382 | 0.167262957 | 0.188246831 |
| 0.750386596 | 0.001558584 | 0.282829344 |
| 0.000000000 | 0.250000000 | 0.000000000 |
| 0.167219996 | 0.333609998 | 0.094010003 |
| 0.082934298 | 0.417497098 | 0.188435078 |
| 0.995247841 | 0.246282965 | 0.282875299 |
| 0.250000000 | 0.250000000 | 0.000000000 |
| 0.416880012 | 0.333759993 | 0.094740003 |
| 0.333764344 | 0.420453548 | 0.192410991 |
| 0.247845352 | 0.244992703 | 0.282846630 |
| 0.500000000 | 0.250000000 | 0.000000000 |
| 0.666390002 | 0.333609998 | 0.094010003 |
| 0.580433309 | 0.417410493 | 0.189778328 |
| 0.497020721 | 0.244002283 | 0.283521056 |
| 0.750000000 | 0.250000000 | 0.000000000 |
| 0.916689992 | 0.333370000 | 0.093910001 |
| 0.830420434 | 0.415205866 | 0.187126294 |

|             |             |             |
|-------------|-------------|-------------|
| 0.748354316 | 0.249053955 | 0.282875359 |
| 0.000000000 | 0.500000000 | 0.000000000 |
| 0.166779995 | 0.583260000 | 0.094250001 |
| 0.082664259 | 0.666022301 | 0.187984258 |
| 0.990269065 | 0.499192625 | 0.281496942 |
| 0.250000000 | 0.500000000 | 0.000000000 |
| 0.416880012 | 0.583119988 | 0.094740003 |
| 0.332975775 | 0.665049851 | 0.189050227 |
| 0.236027732 | 0.501290798 | 0.294148654 |
| 0.500000000 | 0.500000000 | 0.000000000 |
| 0.666239977 | 0.583119988 | 0.094740003 |
| 0.582100511 | 0.663530827 | 0.189086661 |
| 0.750000000 | 0.500000000 | 0.000000000 |
| 0.916480005 | 0.583260000 | 0.094250001 |
| 0.831560612 | 0.665564597 | 0.188172162 |
| 0.750703633 | 0.500882506 | 0.283196330 |
| 0.000000000 | 0.750000000 | 0.000000000 |
| 0.166669995 | 0.833329976 | 0.094530001 |
| 0.082841873 | 0.916850328 | 0.188131183 |
| 0.000477360 | 0.751504123 | 0.283762634 |
| 0.250000000 | 0.750000000 | 0.000000000 |
| 0.416740000 | 0.833220005 | 0.094250001 |
| 0.332644939 | 0.916199625 | 0.188142553 |
| 0.248448700 | 0.753997386 | 0.284036309 |
| 0.500000000 | 0.750000000 | 0.000000000 |
| 0.666390002 | 0.832780004 | 0.094010003 |
| 0.583864033 | 0.917596519 | 0.186663508 |
| 0.504894376 | 0.755362093 | 0.280558765 |
| 0.750000000 | 0.750000000 | 0.000000000 |
| 0.916480005 | 0.833220005 | 0.094250001 |

|             |             |             |
|-------------|-------------|-------------|
| 0.832747757 | 0.916942775 | 0.187373534 |
| 0.755470634 | 0.753734291 | 0.283093482 |
| 0.498584151 | 0.504332960 | 0.357876003 |
| 0.364779532 | 0.687383771 | 0.326739669 |
| 0.824025393 | 0.662238479 | 0.327993691 |
| 0.337243944 | 0.175213858 | 0.328694999 |
| 0.171324596 | 0.322150379 | 0.326302677 |
| 0.664756238 | 0.826603234 | 0.326145142 |
| 0.661038697 | 0.336725891 | 0.326738209 |
| 0.129983678 | 0.557060778 | 0.336506844 |
| 0.403352290 | 0.625822842 | 0.466644168 |
| 0.186956450 | 0.500980794 | 0.362357646 |
| 0.441990405 | 0.563576579 | 0.447933316 |

H<sub>6</sub>Ce@Ni-Heyrovsky-FS

1.0

|               |              |               |
|---------------|--------------|---------------|
| 10.0322999954 | 0.0000000000 | 0.0000000000  |
| -5.0161499977 | 8.6882266544 | 0.0000000000  |
| 0.0000000000  | 0.0000000000 | 21.1434993744 |

|    |    |   |   |
|----|----|---|---|
| Ni | Ce | H | O |
| 63 | 1  | 9 | 1 |

Direct

|             |             |             |
|-------------|-------------|-------------|
| 0.000000000 | 0.000000000 | 0.000000000 |
| 0.166779995 | 0.083520003 | 0.094250001 |
| 0.083497494 | 0.167914107 | 0.187588573 |
| 0.998896420 | 0.000288867 | 0.282309920 |
| 0.250000000 | 0.000000000 | 0.000000000 |
| 0.416740000 | 0.083520003 | 0.094250001 |
| 0.333971202 | 0.168042347 | 0.188289315 |
| 0.248997301 | 0.998458445 | 0.283656806 |

|             |             |             |
|-------------|-------------|-------------|
| 0.500000000 | 0.000000000 | 0.000000000 |
| 0.666630030 | 0.083310001 | 0.093910001 |
| 0.584247887 | 0.167900458 | 0.187567115 |
| 0.501036823 | 0.000524209 | 0.282191217 |
| 0.750000000 | 0.000000000 | 0.000000000 |
| 0.916689992 | 0.083310001 | 0.093910001 |
| 0.833587289 | 0.167389661 | 0.188829109 |
| 0.749834180 | 0.000410107 | 0.283181757 |
| 0.000000000 | 0.250000000 | 0.000000000 |
| 0.167219996 | 0.333609998 | 0.094010003 |
| 0.082942545 | 0.416816860 | 0.188039899 |
| 0.999275804 | 0.248537511 | 0.283312142 |
| 0.250000000 | 0.250000000 | 0.000000000 |
| 0.416880012 | 0.333759993 | 0.094740003 |
| 0.335736871 | 0.417914599 | 0.189746946 |
| 0.247593641 | 0.245545238 | 0.283510029 |
| 0.500000000 | 0.250000000 | 0.000000000 |
| 0.666390002 | 0.333609998 | 0.094010003 |
| 0.581977963 | 0.418023050 | 0.189791366 |
| 0.497685194 | 0.245665297 | 0.283487350 |
| 0.750000000 | 0.250000000 | 0.000000000 |
| 0.916689992 | 0.333370000 | 0.093910001 |
| 0.833819926 | 0.417003512 | 0.188019827 |
| 0.748930573 | 0.248547256 | 0.283188045 |
| 0.000000000 | 0.500000000 | 0.000000000 |
| 0.166779995 | 0.583260000 | 0.094250001 |
| 0.082808070 | 0.665774703 | 0.188716859 |
| 0.999678373 | 0.499693483 | 0.284999013 |
| 0.250000000 | 0.500000000 | 0.000000000 |
| 0.416880012 | 0.583119988 | 0.094740003 |

|             |             |             |
|-------------|-------------|-------------|
| 0.333714634 | 0.665764570 | 0.188309014 |
| 0.249387920 | 0.501238346 | 0.283090562 |
| 0.500000000 | 0.500000000 | 0.000000000 |
| 0.666239977 | 0.583119988 | 0.094740003 |
| 0.581912756 | 0.664184928 | 0.189657360 |
| 0.750000000 | 0.500000000 | 0.000000000 |
| 0.916480005 | 0.583260000 | 0.094250001 |
| 0.831908762 | 0.665914476 | 0.188333943 |
| 0.751585484 | 0.501383305 | 0.283145458 |
| 0.000000000 | 0.750000000 | 0.000000000 |
| 0.166669995 | 0.833329976 | 0.094530001 |
| 0.083227284 | 0.916540861 | 0.188208938 |
| 0.000725803 | 0.751843512 | 0.283664554 |
| 0.250000000 | 0.750000000 | 0.000000000 |
| 0.416740000 | 0.833220005 | 0.094250001 |
| 0.332987279 | 0.916441560 | 0.188185841 |
| 0.250679106 | 0.751941800 | 0.283584565 |
| 0.500000000 | 0.750000000 | 0.000000000 |
| 0.666390002 | 0.832780004 | 0.094010003 |
| 0.583806872 | 0.916683853 | 0.187496603 |
| 0.498675734 | 0.752413750 | 0.283377677 |
| 0.750000000 | 0.750000000 | 0.000000000 |
| 0.916480005 | 0.833220005 | 0.094250001 |
| 0.832618892 | 0.916706562 | 0.187498018 |
| 0.752952874 | 0.752548218 | 0.283398479 |
| 0.499440283 | 0.500234663 | 0.361471862 |
| 0.339733601 | 0.662260473 | 0.328051478 |
| 0.821691036 | 0.662420690 | 0.328056574 |
| 0.337065727 | 0.174501717 | 0.328275770 |
| 0.177359357 | 0.337129235 | 0.326599360 |

|             |             |             |
|-------------|-------------|-------------|
| 0.661975443 | 0.824913859 | 0.326788992 |
| 0.659760058 | 0.337540179 | 0.326598793 |
| 0.020154839 | 0.550162077 | 0.358091652 |
| 0.498011976 | 0.508073568 | 0.508748829 |
| 0.980582118 | 0.451090425 | 0.358387232 |
| 0.498605460 | 0.504492462 | 0.462990910 |

Ce(OH)<sub>5</sub>@Ni-Volmer-IS

1.0

|               |              |               |
|---------------|--------------|---------------|
| 10.0322999954 | 0.0000000000 | 0.0000000000  |
| -5.0161499977 | 8.6882266544 | 0.0000000000  |
| 0.0000000000  | 0.0000000000 | 21.1434993744 |

| Ni | Ce | O | H |
|----|----|---|---|
| 63 | 1  | 6 | 7 |

Direct

|             |             |             |
|-------------|-------------|-------------|
| 0.000000000 | 0.000000000 | 0.000000000 |
| 0.166779995 | 0.083520003 | 0.094250001 |
| 0.084559381 | 0.167499706 | 0.187356919 |
| 0.002574461 | 0.003264980 | 0.281809479 |
| 0.250000000 | 0.000000000 | 0.000000000 |
| 0.416740000 | 0.083520003 | 0.094250001 |
| 0.334054500 | 0.169541866 | 0.189364642 |
| 0.247624099 | 0.996904135 | 0.281039834 |
| 0.500000000 | 0.000000000 | 0.000000000 |
| 0.666630030 | 0.083310001 | 0.093910001 |
| 0.581326723 | 0.168718576 | 0.188337713 |
| 0.498969257 | 0.999629200 | 0.281682044 |
| 0.750000000 | 0.000000000 | 0.000000000 |
| 0.916689992 | 0.083310001 | 0.093910001 |
| 0.831333041 | 0.165925264 | 0.185882285 |

|             |             |             |
|-------------|-------------|-------------|
| 0.750633180 | 0.004068719 | 0.280115902 |
| 0.000000000 | 0.250000000 | 0.000000000 |
| 0.167219996 | 0.333609998 | 0.094010003 |
| 0.084657937 | 0.417237192 | 0.187397048 |
| 0.991252482 | 0.245689899 | 0.279526800 |
| 0.250000000 | 0.250000000 | 0.000000000 |
| 0.416880012 | 0.333759993 | 0.094740003 |
| 0.337420434 | 0.418730736 | 0.189609274 |
| 0.247761890 | 0.248599872 | 0.283497125 |
| 0.500000000 | 0.250000000 | 0.000000000 |
| 0.666390002 | 0.333609998 | 0.094010003 |
| 0.582386434 | 0.418442339 | 0.192785010 |
| 0.498690158 | 0.242400318 | 0.287193507 |
| 0.750000000 | 0.250000000 | 0.000000000 |
| 0.916689992 | 0.333370000 | 0.093910001 |
| 0.831745446 | 0.416977912 | 0.187403157 |
| 0.750933826 | 0.247422084 | 0.280243933 |
| 0.000000000 | 0.500000000 | 0.000000000 |
| 0.166779995 | 0.583260000 | 0.094250001 |
| 0.082546607 | 0.665968716 | 0.187142462 |
| 0.002476057 | 0.499547571 | 0.281838894 |
| 0.250000000 | 0.500000000 | 0.000000000 |
| 0.416880012 | 0.583119988 | 0.094740003 |
| 0.334062934 | 0.664547324 | 0.189347744 |
| 0.247473449 | 0.498803169 | 0.283571512 |
| 0.500000000 | 0.500000000 | 0.000000000 |
| 0.666239977 | 0.583119988 | 0.094740003 |
| 0.582460880 | 0.664066374 | 0.192884058 |
| 0.750000000 | 0.500000000 | 0.000000000 |
| 0.916480005 | 0.583260000 | 0.094250001 |



|             |             |             |
|-------------|-------------|-------------|
| 0.830726206 | 0.665552318 | 0.189257488 |
| 0.760230780 | 0.501544595 | 0.284495473 |
| 0.000000000 | 0.750000000 | 0.000000000 |
| 0.166669995 | 0.833329976 | 0.094530001 |
| 0.082508571 | 0.916698635 | 0.187122703 |
| 0.005317288 | 0.752858937 | 0.281538725 |
| 0.250000000 | 0.750000000 | 0.000000000 |
| 0.416740000 | 0.833220005 | 0.094250001 |
| 0.333700866 | 0.916957676 | 0.186971873 |
| 0.247484431 | 0.750838935 | 0.281033725 |
| 0.500000000 | 0.750000000 | 0.000000000 |
| 0.666390002 | 0.832780004 | 0.094010003 |
| 0.581261277 | 0.912797391 | 0.188265309 |
| 0.498491436 | 0.756485045 | 0.287015945 |
| 0.750000000 | 0.750000000 | 0.000000000 |
| 0.916480005 | 0.833220005 | 0.094250001 |
| 0.831660807 | 0.914883733 | 0.187466651 |
| 0.760492504 | 0.759332955 | 0.284927636 |
| 0.539972365 | 0.519605041 | 0.381819010 |
| 0.771901429 | 0.493440866 | 0.377174109 |
| 0.258712292 | 0.378704429 | 0.360721320 |
| 0.771806419 | 0.781947017 | 0.378349811 |
| 0.472438663 | 0.248137593 | 0.379940718 |
| 0.470711023 | 0.722175062 | 0.379386663 |
| 0.704743028 | 0.618318319 | 0.490303487 |
| 0.741804838 | 0.385711938 | 0.384746641 |
| 0.736923873 | 0.856281638 | 0.384968877 |
| 0.158614382 | 0.327613324 | 0.381462306 |
| 0.369411707 | 0.161821693 | 0.388002425 |
| 0.366770893 | 0.703072906 | 0.387364417 |

|             |             |             |
|-------------|-------------|-------------|
| 0.770395517 | 0.710197568 | 0.464039743 |
| 0.760178089 | 0.561402738 | 0.488041729 |

Ce(OH)<sub>5</sub>@Ni-Volmer-TS

1.0

|               |              |               |
|---------------|--------------|---------------|
| 10.0322999954 | 0.0000000000 | 0.0000000000  |
| -5.0161499977 | 8.6882266544 | 0.0000000000  |
| 0.0000000000  | 0.0000000000 | 21.1434993744 |

|    |    |   |   |
|----|----|---|---|
| Ni | Ce | O | H |
| 63 | 1  | 6 | 7 |

Direct

|             |             |             |
|-------------|-------------|-------------|
| 0.000000000 | 0.000000000 | 0.000000000 |
| 0.166779995 | 0.083520003 | 0.094250001 |
| 0.084629998 | 0.167370006 | 0.187350005 |
| 0.001670000 | 0.001960000 | 0.281760007 |
| 0.250000000 | 0.000000000 | 0.000000000 |
| 0.416740000 | 0.083520003 | 0.094250001 |
| 0.334219992 | 0.169799998 | 0.189530000 |
| 0.248579994 | 0.998749971 | 0.281520009 |
| 0.500000000 | 0.000000000 | 0.000000000 |
| 0.666630030 | 0.083310001 | 0.093910001 |
| 0.581570029 | 0.168929994 | 0.188409999 |
| 0.499529988 | 0.001520000 | 0.281859994 |
| 0.750000000 | 0.000000000 | 0.000000000 |
| 0.916689992 | 0.083310001 | 0.093910001 |
| 0.831009984 | 0.164949998 | 0.186000004 |
| 0.750800014 | 0.002960000 | 0.280779988 |
| 0.000000000 | 0.250000000 | 0.000000000 |
| 0.167219996 | 0.333609998 | 0.094010003 |
| 0.085019998 | 0.416830003 | 0.187150002 |

|             |             |             |
|-------------|-------------|-------------|
| 0.990729988 | 0.245399997 | 0.279320002 |
| 0.250000000 | 0.250000000 | 0.000000000 |
| 0.416880012 | 0.333759993 | 0.094740003 |
| 0.337249994 | 0.418689996 | 0.189740002 |
| 0.246950001 | 0.248239994 | 0.284189999 |
| 0.500000000 | 0.250000000 | 0.000000000 |
| 0.666390002 | 0.333609998 | 0.094010003 |
| 0.582459986 | 0.419140011 | 0.192320004 |
| 0.501850009 | 0.247639999 | 0.287070006 |
| 0.750000000 | 0.250000000 | 0.000000000 |
| 0.916689992 | 0.333370000 | 0.093910001 |
| 0.832149982 | 0.416599989 | 0.187279999 |
| 0.751640022 | 0.248070002 | 0.280809999 |
| 0.000000000 | 0.500000000 | 0.000000000 |
| 0.166779995 | 0.583260000 | 0.094250001 |
| 0.082979999 | 0.666320026 | 0.186949998 |
| 0.003180000 | 0.500339985 | 0.281309992 |
| 0.250000000 | 0.500000000 | 0.000000000 |
| 0.416880012 | 0.583119988 | 0.094740003 |
| 0.333939999 | 0.664699972 | 0.189349994 |
| 0.247810006 | 0.499579996 | 0.283609986 |
| 0.500000000 | 0.500000000 | 0.000000000 |
| 0.666239977 | 0.583119988 | 0.094740003 |
| 0.582140028 | 0.664560020 | 0.192709997 |
| 0.750000000 | 0.500000000 | 0.000000000 |
| 0.916480005 | 0.583260000 | 0.094250001 |
| 0.831160009 | 0.666090012 | 0.188850001 |
| 0.761690021 | 0.501590014 | 0.283479989 |
| 0.000000000 | 0.750000000 | 0.000000000 |
| 0.166669995 | 0.833329976 | 0.094530001 |

|             |             |             |
|-------------|-------------|-------------|
| 0.083350003 | 0.917519987 | 0.187050000 |
| 0.005840000 | 0.752759993 | 0.281419992 |
| 0.250000000 | 0.750000000 | 0.000000000 |
| 0.416740000 | 0.833220005 | 0.094250001 |
| 0.334060013 | 0.917530000 | 0.187089995 |
| 0.247429997 | 0.751680017 | 0.281019986 |
| 0.500000000 | 0.750000000 | 0.000000000 |
| 0.666390002 | 0.832780004 | 0.094010003 |
| 0.581489980 | 0.913230002 | 0.188250005 |
| 0.498629987 | 0.757480025 | 0.286929995 |
| 0.750000000 | 0.750000000 | 0.000000000 |
| 0.916480005 | 0.833220005 | 0.094250001 |
| 0.831420004 | 0.914579988 | 0.187680006 |
| 0.758040011 | 0.754230022 | 0.284830004 |
| 0.528110027 | 0.527190030 | 0.400420010 |
| 0.780350029 | 0.490940005 | 0.382429987 |
| 0.254909992 | 0.378639996 | 0.360610008 |
| 0.770560026 | 0.762350023 | 0.376859993 |
| 0.488970011 | 0.263489991 | 0.378800005 |
| 0.471769989 | 0.734279990 | 0.379099995 |
| 0.586189985 | 0.536379993 | 0.501339972 |
| 0.727680027 | 0.384869993 | 0.398180008 |
| 0.766550004 | 0.855080009 | 0.387510002 |
| 0.153549999 | 0.328379989 | 0.380419999 |
| 0.397020012 | 0.168139994 | 0.391020000 |
| 0.373979986 | 0.729929984 | 0.387430012 |
| 0.643949986 | 0.610130012 | 0.534259975 |
| 0.840499997 | 0.642250001 | 0.427810013 |

1.0

|               |              |               |
|---------------|--------------|---------------|
| 10.0322999954 | 0.0000000000 | 0.0000000000  |
| -5.0161499977 | 8.6882266544 | 0.0000000000  |
| 0.0000000000  | 0.0000000000 | 21.1434993744 |

|    |    |   |   |
|----|----|---|---|
| Ni | Ce | O | H |
| 63 | 1  | 6 | 7 |

Direct

|             |             |             |
|-------------|-------------|-------------|
| 0.000000000 | 0.000000000 | 0.000000000 |
| 0.166779995 | 0.083520003 | 0.094250001 |
| 0.084718831 | 0.167589903 | 0.187482521 |
| 0.003076108 | 0.003049168 | 0.281743079 |
| 0.250000000 | 0.000000000 | 0.000000000 |
| 0.416740000 | 0.083520003 | 0.094250001 |
| 0.334006697 | 0.169785902 | 0.189099938 |
| 0.248548329 | 0.997736633 | 0.280529499 |
| 0.500000000 | 0.000000000 | 0.000000000 |
| 0.666630030 | 0.083310001 | 0.093910001 |
| 0.581798017 | 0.169103175 | 0.188317791 |
| 0.500090301 | 0.000426288 | 0.281470567 |
| 0.750000000 | 0.000000000 | 0.000000000 |
| 0.916689992 | 0.083310001 | 0.093910001 |
| 0.831598282 | 0.165875658 | 0.186253563 |
| 0.751555681 | 0.004408512 | 0.280540794 |
| 0.000000000 | 0.250000000 | 0.000000000 |
| 0.167219996 | 0.333609998 | 0.094010003 |
| 0.084736161 | 0.417234302 | 0.187523231 |
| 0.992201269 | 0.246162236 | 0.279897720 |
| 0.250000000 | 0.250000000 | 0.000000000 |
| 0.416880012 | 0.333759993 | 0.094740003 |
| 0.337245822 | 0.418651193 | 0.189398557 |

|             |             |             |
|-------------|-------------|-------------|
| 0.247809350 | 0.248825148 | 0.283778816 |
| 0.500000000 | 0.250000000 | 0.000000000 |
| 0.666390002 | 0.333609998 | 0.094010003 |
| 0.582551241 | 0.418318033 | 0.192861781 |
| 0.497110665 | 0.241979688 | 0.287304282 |
| 0.750000000 | 0.250000000 | 0.000000000 |
| 0.916689992 | 0.333370000 | 0.093910001 |
| 0.831675828 | 0.417637974 | 0.187981337 |
| 0.751634181 | 0.247541398 | 0.280519277 |
| 0.000000000 | 0.500000000 | 0.000000000 |
| 0.166779995 | 0.583260000 | 0.094250001 |
| 0.083054915 | 0.665497005 | 0.186575308 |
| 0.003084331 | 0.500225663 | 0.281752110 |
| 0.250000000 | 0.500000000 | 0.000000000 |
| 0.416880012 | 0.583119988 | 0.094740003 |
| 0.334021121 | 0.664417803 | 0.189134747 |
| 0.247855797 | 0.498994827 | 0.283805579 |
| 0.500000000 | 0.500000000 | 0.000000000 |
| 0.666239977 | 0.583119988 | 0.094740003 |
| 0.582540452 | 0.664274275 | 0.192955315 |
| 0.750000000 | 0.500000000 | 0.000000000 |
| 0.916480005 | 0.583260000 | 0.094250001 |
| 0.830347478 | 0.665162027 | 0.189674959 |
| 0.756689370 | 0.495305777 | 0.287906379 |
| 0.000000000 | 0.750000000 | 0.000000000 |
| 0.166669995 | 0.833329976 | 0.094530001 |
| 0.083040088 | 0.917621136 | 0.186585858 |
| 0.012211381 | 0.756194949 | 0.280038416 |
| 0.250000000 | 0.750000000 | 0.000000000 |
| 0.416740000 | 0.833220005 | 0.094250001 |

|             |             |             |
|-------------|-------------|-------------|
| 0.334172189 | 0.917113125 | 0.186749890 |
| 0.248427898 | 0.751030505 | 0.280570120 |
| 0.500000000 | 0.750000000 | 0.000000000 |
| 0.666390002 | 0.832780004 | 0.094010003 |
| 0.581766129 | 0.912748277 | 0.188377634 |
| 0.497100770 | 0.755930424 | 0.287369788 |
| 0.750000000 | 0.750000000 | 0.000000000 |
| 0.916480005 | 0.833220005 | 0.094250001 |
| 0.831639349 | 0.914076447 | 0.188023135 |
| 0.756711006 | 0.761638522 | 0.287941158 |
| 0.536985159 | 0.518433928 | 0.408573031 |
| 0.752469599 | 0.472168088 | 0.379363805 |
| 0.262860626 | 0.381365687 | 0.358334184 |
| 0.752285838 | 0.780507803 | 0.379452318 |
| 0.458880663 | 0.243775576 | 0.376708984 |
| 0.458220452 | 0.714604020 | 0.376667440 |
| 0.497976631 | 0.497849464 | 0.509719193 |
| 0.710794747 | 0.362521917 | 0.387850195 |
| 0.710535288 | 0.848471761 | 0.387851745 |
| 0.167261094 | 0.333355099 | 0.382505983 |
| 0.357493579 | 0.157933787 | 0.387476176 |
| 0.356489420 | 0.698324502 | 0.387317568 |
| 0.517796457 | 0.506003022 | 0.554725885 |
| 0.849334955 | 0.674678683 | 0.313907862 |

Ce(OH)<sub>5</sub>@Ni-Heyrovsky-IS

1.0

|               |              |               |
|---------------|--------------|---------------|
| 10.0322999954 | 0.0000000000 | 0.0000000000  |
| -5.0161499977 | 8.6882266544 | 0.0000000000  |
| 0.0000000000  | 0.0000000000 | 21.1434993744 |

|    |    |   |   |
|----|----|---|---|
| Ni | Ce | O | H |
| 63 | 1  | 6 | 8 |

Direct

|             |             |             |
|-------------|-------------|-------------|
| 0.000000000 | 0.000000000 | 0.000000000 |
| 0.166779995 | 0.083520003 | 0.094250001 |
| 0.084528133 | 0.167822406 | 0.187258974 |
| 0.004235478 | 0.004767888 | 0.281708747 |
| 0.250000000 | 0.000000000 | 0.000000000 |
| 0.416740000 | 0.083520003 | 0.094250001 |
| 0.334005207 | 0.169970036 | 0.189160362 |
| 0.248806849 | 0.998393238 | 0.280682057 |
| 0.500000000 | 0.000000000 | 0.000000000 |
| 0.666630030 | 0.083310001 | 0.093910001 |
| 0.581211150 | 0.169171900 | 0.188514143 |
| 0.499641389 | 0.000718084 | 0.281839490 |
| 0.750000000 | 0.000000000 | 0.000000000 |
| 0.916689992 | 0.083310001 | 0.093910001 |
| 0.830954909 | 0.166000739 | 0.185982019 |
| 0.750939071 | 0.004716221 | 0.280307531 |
| 0.000000000 | 0.250000000 | 0.000000000 |
| 0.167219996 | 0.333609998 | 0.094010003 |
| 0.084502771 | 0.417405009 | 0.187190920 |
| 0.991009116 | 0.246243998 | 0.279139817 |
| 0.250000000 | 0.250000000 | 0.000000000 |
| 0.416880012 | 0.333759993 | 0.094740003 |
| 0.337616533 | 0.419130027 | 0.189455777 |
| 0.247376919 | 0.249468267 | 0.283251524 |
| 0.500000000 | 0.250000000 | 0.000000000 |
| 0.666390002 | 0.333609998 | 0.094010003 |
| 0.582370698 | 0.418762594 | 0.193333074 |



|             |             |             |
|-------------|-------------|-------------|
| 0.497088134 | 0.242869675 | 0.287507862 |
| 0.750000000 | 0.250000000 | 0.000000000 |
| 0.916689992 | 0.333370000 | 0.093910001 |
| 0.831540942 | 0.417858988 | 0.187970772 |
| 0.750632763 | 0.248059213 | 0.280414402 |
| 0.000000000 | 0.500000000 | 0.000000000 |
| 0.166779995 | 0.583260000 | 0.094250001 |
| 0.082913205 | 0.665643990 | 0.186670318 |
| 0.003835311 | 0.500567138 | 0.281635016 |
| 0.250000000 | 0.500000000 | 0.000000000 |
| 0.416880012 | 0.583119988 | 0.094740003 |
| 0.334112227 | 0.664724529 | 0.189174533 |
| 0.247543767 | 0.499090701 | 0.283058256 |
| 0.500000000 | 0.500000000 | 0.000000000 |
| 0.666239977 | 0.583119988 | 0.094740003 |
| 0.582624912 | 0.664489985 | 0.193332776 |
| 0.750000000 | 0.500000000 | 0.000000000 |
| 0.916480005 | 0.583260000 | 0.094250001 |
| 0.830263913 | 0.665632308 | 0.190059990 |
| 0.758960783 | 0.497707158 | 0.288108438 |
| 0.000000000 | 0.750000000 | 0.000000000 |
| 0.166669995 | 0.833329976 | 0.094530001 |
| 0.083017014 | 0.917975664 | 0.186652109 |
| 0.012040589 | 0.756799817 | 0.280304432 |
| 0.250000000 | 0.750000000 | 0.000000000 |
| 0.416740000 | 0.833220005 | 0.094250001 |
| 0.334161997 | 0.917285502 | 0.186858609 |
| 0.248295233 | 0.751621962 | 0.280625999 |
| 0.500000000 | 0.750000000 | 0.000000000 |
| 0.666390002 | 0.832780004 | 0.094010003 |

|             |             |             |
|-------------|-------------|-------------|
| 0.581492901 | 0.912804782 | 0.188414216 |
| 0.497352183 | 0.756481588 | 0.287188262 |
| 0.750000000 | 0.750000000 | 0.000000000 |
| 0.916480005 | 0.833220005 | 0.094250001 |
| 0.831916630 | 0.914859891 | 0.187925667 |
| 0.758697331 | 0.763595462 | 0.287942797 |
| 0.536658168 | 0.520156443 | 0.383157879 |
| 0.755657971 | 0.468875110 | 0.382282346 |
| 0.256153464 | 0.379135251 | 0.360289305 |
| 0.755443990 | 0.790636301 | 0.381839007 |
| 0.457852155 | 0.243842065 | 0.379336715 |
| 0.457189202 | 0.716998816 | 0.379102737 |
| 0.707241058 | 0.605140150 | 0.489574939 |
| 0.708729029 | 0.357748777 | 0.388484478 |
| 0.708795428 | 0.855203867 | 0.387839168 |
| 0.156239569 | 0.329447985 | 0.381152093 |
| 0.352890253 | 0.159725294 | 0.386086613 |
| 0.351557225 | 0.694632709 | 0.385435879 |
| 0.850163341 | 0.676559210 | 0.315488517 |
| 0.765499234 | 0.711343050 | 0.473497897 |
| 0.765541077 | 0.558918118 | 0.471635073 |

Ce(OH)<sub>5</sub>@Ni-Heyrovsky-TS

1.0

|               |              |               |
|---------------|--------------|---------------|
| 10.0322999954 | 0.0000000000 | 0.0000000000  |
| -5.0161499977 | 8.6882266544 | 0.0000000000  |
| 0.0000000000  | 0.0000000000 | 21.1434993744 |

|    |    |   |   |
|----|----|---|---|
| Ni | Ce | O | H |
| 63 | 1  | 6 | 8 |

Direct

|             |             |             |
|-------------|-------------|-------------|
| 0.000000000 | 0.000000000 | 0.000000000 |
| 0.166779995 | 0.083520003 | 0.094250001 |
| 0.084254809 | 0.166933686 | 0.187662303 |
| 0.999690890 | 0.002809482 | 0.281575590 |
| 0.250000000 | 0.000000000 | 0.000000000 |
| 0.416740000 | 0.083520003 | 0.094250001 |
| 0.332902640 | 0.169283882 | 0.189676493 |
| 0.247593284 | 0.998456895 | 0.280907720 |
| 0.500000000 | 0.000000000 | 0.000000000 |
| 0.666630030 | 0.083310001 | 0.093910001 |
| 0.580141783 | 0.168492779 | 0.188473165 |
| 0.497892529 | 0.999645472 | 0.281741679 |
| 0.750000000 | 0.000000000 | 0.000000000 |
| 0.916689992 | 0.083310001 | 0.093910001 |
| 0.830833972 | 0.165972084 | 0.185737237 |
| 0.748930454 | 0.004252125 | 0.279598743 |
| 0.000000000 | 0.250000000 | 0.000000000 |
| 0.167219996 | 0.333609998 | 0.094010003 |
| 0.084017590 | 0.417574406 | 0.187542394 |
| 0.990149260 | 0.245308280 | 0.279432505 |
| 0.250000000 | 0.250000000 | 0.000000000 |
| 0.416880012 | 0.333759993 | 0.094740003 |
| 0.336233884 | 0.418241829 | 0.189862743 |
| 0.245744273 | 0.249079108 | 0.285432816 |
| 0.500000000 | 0.250000000 | 0.000000000 |
| 0.666390002 | 0.333609998 | 0.094010003 |
| 0.581078708 | 0.417707175 | 0.192181677 |
| 0.495955080 | 0.242870033 | 0.288625181 |
| 0.750000000 | 0.250000000 | 0.000000000 |
| 0.916689992 | 0.333370000 | 0.093910001 |

|             |             |             |
|-------------|-------------|-------------|
| 0.830878735 | 0.417291164 | 0.187377244 |
| 0.749171793 | 0.246656954 | 0.280155838 |
| 0.000000000 | 0.500000000 | 0.000000000 |
| 0.166779995 | 0.583260000 | 0.094250001 |
| 0.081531443 | 0.666387022 | 0.187299937 |
| 0.999694645 | 0.497448564 | 0.281493157 |
| 0.250000000 | 0.500000000 | 0.000000000 |
| 0.416880012 | 0.583119988 | 0.094740003 |
| 0.332566082 | 0.663936913 | 0.189212352 |
| 0.245799348 | 0.497528732 | 0.284913599 |
| 0.500000000 | 0.500000000 | 0.000000000 |
| 0.666239977 | 0.583119988 | 0.094740003 |
| 0.581128836 | 0.663803339 | 0.191811398 |
| 0.750000000 | 0.500000000 | 0.000000000 |
| 0.916480005 | 0.583260000 | 0.094250001 |
| 0.830804586 | 0.665670455 | 0.189448431 |
| 0.753587067 | 0.498326153 | 0.283677429 |
| 0.000000000 | 0.750000000 | 0.000000000 |
| 0.166669995 | 0.833329976 | 0.094530001 |
| 0.081703402 | 0.915721893 | 0.187361762 |
| 0.004812227 | 0.752675295 | 0.283391595 |
| 0.250000000 | 0.750000000 | 0.000000000 |
| 0.416740000 | 0.833220005 | 0.094250001 |
| 0.332681656 | 0.916570663 | 0.186885491 |
| 0.247273922 | 0.749653220 | 0.280473441 |
| 0.500000000 | 0.750000000 | 0.000000000 |
| 0.666390002 | 0.832780004 | 0.094010003 |
| 0.580209374 | 0.912502885 | 0.188072070 |
| 0.495790869 | 0.754163086 | 0.286797464 |
| 0.750000000 | 0.750000000 | 0.000000000 |

|             |             |             |
|-------------|-------------|-------------|
| 0.916480005 | 0.833220005 | 0.094250001 |
| 0.831291199 | 0.914676487 | 0.187094584 |
| 0.753064811 | 0.756612599 | 0.282830477 |
| 0.555932939 | 0.534098566 | 0.410115749 |
| 0.763495505 | 0.488980174 | 0.374518871 |
| 0.261440068 | 0.382394552 | 0.360636204 |
| 0.765000045 | 0.783319592 | 0.373085827 |
| 0.467279613 | 0.254259855 | 0.379233927 |
| 0.466234684 | 0.718530774 | 0.377167881 |
| 0.657703519 | 0.619117141 | 0.504252970 |
| 0.726743758 | 0.380821586 | 0.384709805 |
| 0.726523638 | 0.853381395 | 0.383200139 |
| 0.161896124 | 0.333180070 | 0.382045060 |
| 0.364708573 | 0.169967756 | 0.389249355 |
| 0.363384962 | 0.699057102 | 0.387333721 |
| 0.001225028 | 0.792972982 | 0.357530147 |
| 0.760385811 | 0.703451514 | 0.513860285 |
| 0.000018835 | 0.708070338 | 0.357507288 |

Ce(OH)<sub>5</sub>@Ni-Heyrovsky-FS

1.0

|               |              |               |
|---------------|--------------|---------------|
| 10.0322999954 | 0.0000000000 | 0.0000000000  |
| -5.0161499977 | 8.6882266544 | 0.0000000000  |
| 0.0000000000  | 0.0000000000 | 21.1434993744 |

|    |    |   |   |
|----|----|---|---|
| Ni | Ce | O | H |
| 63 | 1  | 6 | 8 |

Direct

|             |             |             |
|-------------|-------------|-------------|
| 0.000000000 | 0.000000000 | 0.000000000 |
| 0.166779995 | 0.083520003 | 0.094250001 |
| 0.085112974 | 0.167191118 | 0.187579885 |

|             |             |             |
|-------------|-------------|-------------|
| 0.002303682 | 0.003840154 | 0.281612545 |
| 0.250000000 | 0.000000000 | 0.000000000 |
| 0.416740000 | 0.083520003 | 0.094250001 |
| 0.334133059 | 0.169230372 | 0.189197242 |
| 0.249846891 | 0.999549568 | 0.280608475 |
| 0.500000000 | 0.000000000 | 0.000000000 |
| 0.666630030 | 0.083310001 | 0.093910001 |
| 0.581856847 | 0.168829858 | 0.188149706 |
| 0.500425577 | 0.000374098 | 0.281276703 |
| 0.750000000 | 0.000000000 | 0.000000000 |
| 0.916689992 | 0.083310001 | 0.093910001 |
| 0.832153022 | 0.166001156 | 0.186105639 |
| 0.751732826 | 0.004454578 | 0.280387640 |
| 0.000000000 | 0.250000000 | 0.000000000 |
| 0.167219996 | 0.333609998 | 0.094010003 |
| 0.084995128 | 0.417688668 | 0.187488735 |
| 0.992904425 | 0.246346876 | 0.280014336 |
| 0.250000000 | 0.250000000 | 0.000000000 |
| 0.416880012 | 0.333759993 | 0.094740003 |
| 0.337468177 | 0.418725699 | 0.189391926 |
| 0.248811007 | 0.249357194 | 0.283845067 |
| 0.500000000 | 0.250000000 | 0.000000000 |
| 0.666390002 | 0.333609998 | 0.094010003 |
| 0.582926869 | 0.418633312 | 0.192454278 |
| 0.499403507 | 0.242875874 | 0.287123531 |
| 0.750000000 | 0.250000000 | 0.000000000 |
| 0.916689992 | 0.333370000 | 0.093910001 |
| 0.831763804 | 0.417653352 | 0.187639937 |
| 0.751714468 | 0.247201011 | 0.280431718 |
| 0.000000000 | 0.500000000 | 0.000000000 |

|             |             |             |
|-------------|-------------|-------------|
| 0.166779995 | 0.583260000 | 0.094250001 |
| 0.082272746 | 0.666431069 | 0.187301621 |
| 0.002177430 | 0.497849315 | 0.281304151 |
| 0.250000000 | 0.500000000 | 0.000000000 |
| 0.416880012 | 0.583119988 | 0.094740003 |
| 0.334063768 | 0.664768577 | 0.189127296 |
| 0.248593554 | 0.499324799 | 0.283813596 |
| 0.500000000 | 0.500000000 | 0.000000000 |
| 0.666239977 | 0.583119988 | 0.094740003 |
| 0.582854450 | 0.664297938 | 0.192466512 |
| 0.750000000 | 0.500000000 | 0.000000000 |
| 0.916480005 | 0.583260000 | 0.094250001 |
| 0.831934810 | 0.666074932 | 0.190195173 |
| 0.758153439 | 0.499754727 | 0.284993261 |
| 0.000000000 | 0.750000000 | 0.000000000 |
| 0.166669995 | 0.833329976 | 0.094530001 |
| 0.082253210 | 0.915835381 | 0.187396750 |
| 0.007955166 | 0.753258228 | 0.284032911 |
| 0.250000000 | 0.750000000 | 0.000000000 |
| 0.416740000 | 0.833220005 | 0.094250001 |
| 0.333641380 | 0.916900933 | 0.186826125 |
| 0.249866113 | 0.750398159 | 0.280343860 |
| 0.500000000 | 0.750000000 | 0.000000000 |
| 0.666390002 | 0.832780004 | 0.094010003 |
| 0.581773162 | 0.913010657 | 0.188134357 |
| 0.499011874 | 0.756591439 | 0.287171572 |
| 0.750000000 | 0.750000000 | 0.000000000 |
| 0.916480005 | 0.833220005 | 0.094250001 |
| 0.831845164 | 0.914164484 | 0.187684700 |
| 0.757690251 | 0.758033097 | 0.284956038 |

|             |             |             |
|-------------|-------------|-------------|
| 0.541712642 | 0.521747947 | 0.408301026 |
| 0.765027583 | 0.492858499 | 0.376597434 |
| 0.267935574 | 0.384066701 | 0.358319551 |
| 0.764473975 | 0.774453580 | 0.375915378 |
| 0.471243888 | 0.250777632 | 0.377127171 |
| 0.470291346 | 0.721596301 | 0.377272874 |
| 0.504972339 | 0.503895760 | 0.509910643 |
| 0.739162505 | 0.387342662 | 0.386536151 |
| 0.733945072 | 0.850898147 | 0.385559648 |
| 0.172269583 | 0.335971177 | 0.382425994 |
| 0.370459199 | 0.164677516 | 0.388381779 |
| 0.369944513 | 0.707811594 | 0.388666749 |
| 0.051698923 | 0.803490758 | 0.357790411 |
| 0.520042777 | 0.513217330 | 0.555226147 |
| 0.981491387 | 0.710517645 | 0.359531611 |

CeO<sub>4</sub>@Ni-Volmer-IS

1.0

|               |              |               |
|---------------|--------------|---------------|
| 10.0322999954 | 0.0000000000 | 0.0000000000  |
| -5.0161499977 | 8.6882266544 | 0.0000000000  |
| 0.0000000000  | 0.0000000000 | 21.1434993744 |

|    |    |   |   |
|----|----|---|---|
| Ni | Ce | O | H |
| 63 | 1  | 5 | 2 |

Direct

|              |              |              |
|--------------|--------------|--------------|
| 0.0000000000 | 0.0000000000 | 0.0000000000 |
| 0.166779995  | 0.083520003  | 0.094250001  |
| 0.084933959  | 0.168360919  | 0.187429443  |
| 0.998147070  | 0.005488841  | 0.280713141  |
| 0.2500000000 | 0.0000000000 | 0.0000000000 |
| 0.416740000  | 0.083520003  | 0.094250001  |



|             |             |             |
|-------------|-------------|-------------|
| 0.334604323 | 0.167921275 | 0.188610166 |
| 0.244850293 | 0.992989540 | 0.282743663 |
| 0.500000000 | 0.000000000 | 0.000000000 |
| 0.666630030 | 0.083310001 | 0.093910001 |
| 0.583330810 | 0.167878568 | 0.188796639 |
| 0.497366637 | 0.990770578 | 0.281215578 |
| 0.750000000 | 0.000000000 | 0.000000000 |
| 0.916689992 | 0.083310001 | 0.093910001 |
| 0.832523525 | 0.168086886 | 0.188608661 |
| 0.749469817 | 0.001395557 | 0.281559527 |
| 0.000000000 | 0.250000000 | 0.000000000 |
| 0.167219996 | 0.333609998 | 0.094010003 |
| 0.087441511 | 0.418176115 | 0.188294277 |
| 0.999586701 | 0.250937909 | 0.281652898 |
| 0.250000000 | 0.250000000 | 0.000000000 |
| 0.416880012 | 0.333759993 | 0.094740003 |
| 0.336063325 | 0.417527765 | 0.190356299 |
| 0.240420789 | 0.243320897 | 0.284078687 |
| 0.500000000 | 0.250000000 | 0.000000000 |
| 0.666390002 | 0.333609998 | 0.094010003 |
| 0.582828462 | 0.416319937 | 0.190622523 |
| 0.491482019 | 0.235551149 | 0.287347496 |
| 0.750000000 | 0.250000000 | 0.000000000 |
| 0.916689992 | 0.333370000 | 0.093910001 |
| 0.833188176 | 0.415582895 | 0.187603712 |
| 0.751761496 | 0.246921778 | 0.286720753 |
| 0.000000000 | 0.500000000 | 0.000000000 |
| 0.166779995 | 0.583260000 | 0.094250001 |
| 0.081556343 | 0.667938292 | 0.188747272 |
| 0.009557424 | 0.500496566 | 0.281268448 |

|             |             |             |
|-------------|-------------|-------------|
| 0.250000000 | 0.500000000 | 0.000000000 |
| 0.416880012 | 0.583119988 | 0.094740003 |
| 0.334204555 | 0.666253567 | 0.188615561 |
| 0.251692295 | 0.500427961 | 0.287167907 |
| 0.500000000 | 0.500000000 | 0.000000000 |
| 0.666239977 | 0.583119988 | 0.094740003 |
| 0.582515478 | 0.664036155 | 0.189991295 |
| 0.750000000 | 0.500000000 | 0.000000000 |
| 0.916480005 | 0.583260000 | 0.094250001 |
| 0.832363546 | 0.665751457 | 0.187629208 |
| 0.762628376 | 0.503075063 | 0.282391548 |
| 0.000000000 | 0.750000000 | 0.000000000 |
| 0.166669995 | 0.833329976 | 0.094530001 |
| 0.082345888 | 0.915114164 | 0.188769847 |
| 0.998795569 | 0.751218796 | 0.289979041 |
| 0.250000000 | 0.750000000 | 0.000000000 |
| 0.416740000 | 0.833220005 | 0.094250001 |
| 0.333138078 | 0.917165458 | 0.187619835 |
| 0.245533869 | 0.752363026 | 0.281925529 |
| 0.500000000 | 0.750000000 | 0.000000000 |
| 0.666390002 | 0.832780004 | 0.094010003 |
| 0.582810700 | 0.913679600 | 0.188107222 |
| 0.503361046 | 0.751881599 | 0.286385030 |
| 0.750000000 | 0.750000000 | 0.000000000 |
| 0.916480005 | 0.833220005 | 0.094250001 |
| 0.832254887 | 0.916867495 | 0.186797127 |
| 0.755713522 | 0.760319054 | 0.281622589 |
| 0.551151931 | 0.490499884 | 0.381639987 |
| 0.410774648 | 0.596840143 | 0.347259015 |
| 0.813329160 | 0.669526041 | 0.345585138 |

|             |             |             |
|-------------|-------------|-------------|
| 0.356807292 | 0.247349396 | 0.352674544 |
| 0.670219362 | 0.335155010 | 0.342787206 |
| 0.343692720 | 0.323741078 | 0.473924071 |
| 0.264565945 | 0.348817408 | 0.484992623 |
| 0.299380988 | 0.248596445 | 0.438562661 |

CeO<sub>4</sub>@Ni-Volmer-TS

1.0

|               |              |               |
|---------------|--------------|---------------|
| 10.0322999954 | 0.0000000000 | 0.0000000000  |
| -5.0161499977 | 8.6882266544 | 0.0000000000  |
| 0.0000000000  | 0.0000000000 | 21.1434993744 |

|    |    |   |   |
|----|----|---|---|
| Ni | Ce | O | H |
| 63 | 1  | 5 | 2 |

Direct

|             |             |             |
|-------------|-------------|-------------|
| 0.000000000 | 0.000000000 | 0.000000000 |
| 0.166779995 | 0.083520003 | 0.094250001 |
| 0.083056822 | 0.167691082 | 0.186608896 |
| 0.995308876 | 0.005652517 | 0.280819386 |
| 0.250000000 | 0.000000000 | 0.000000000 |
| 0.416740000 | 0.083520003 | 0.094250001 |
| 0.334062368 | 0.167913422 | 0.187417686 |
| 0.248611018 | 0.002584815 | 0.290110141 |
| 0.500000000 | 0.000000000 | 0.000000000 |
| 0.666630030 | 0.083310001 | 0.093910001 |
| 0.584547400 | 0.167068735 | 0.187244207 |
| 0.499789089 | 0.991206646 | 0.281024814 |
| 0.750000000 | 0.000000000 | 0.000000000 |
| 0.916689992 | 0.083310001 | 0.093910001 |
| 0.832548857 | 0.168038473 | 0.188412011 |
| 0.749168873 | 0.001461009 | 0.281534970 |

|             |             |             |
|-------------|-------------|-------------|
| 0.000000000 | 0.250000000 | 0.000000000 |
| 0.167219996 | 0.333609998 | 0.094010003 |
| 0.086847566 | 0.418294162 | 0.187877730 |
| 0.999434173 | 0.251841217 | 0.281523347 |
| 0.250000000 | 0.250000000 | 0.000000000 |
| 0.416880012 | 0.333759993 | 0.094740003 |
| 0.335896850 | 0.418633968 | 0.189519942 |
| 0.240788758 | 0.247940540 | 0.281324744 |
| 0.500000000 | 0.250000000 | 0.000000000 |
| 0.666390002 | 0.333609998 | 0.094010003 |
| 0.583713651 | 0.418064505 | 0.189661056 |
| 0.499125093 | 0.240072355 | 0.281656682 |
| 0.750000000 | 0.250000000 | 0.000000000 |
| 0.916689992 | 0.333370000 | 0.093910001 |
| 0.833678424 | 0.416605264 | 0.187675387 |
| 0.753741503 | 0.248423398 | 0.285935074 |
| 0.000000000 | 0.500000000 | 0.000000000 |
| 0.166779995 | 0.583260000 | 0.094250001 |
| 0.081591204 | 0.668702304 | 0.188664362 |
| 0.010305811 | 0.501998425 | 0.281084359 |
| 0.250000000 | 0.500000000 | 0.000000000 |
| 0.416880012 | 0.583119988 | 0.094740003 |
| 0.333172113 | 0.667596459 | 0.188587099 |
| 0.251057625 | 0.499535352 | 0.286426693 |
| 0.500000000 | 0.500000000 | 0.000000000 |
| 0.666239977 | 0.583119988 | 0.094740003 |
| 0.582316816 | 0.664953351 | 0.189855963 |
| 0.750000000 | 0.500000000 | 0.000000000 |
| 0.916480005 | 0.583260000 | 0.094250001 |
| 0.832858920 | 0.666782856 | 0.187931851 |

|             |             |             |
|-------------|-------------|-------------|
| 0.760700345 | 0.503484607 | 0.283396840 |
| 0.000000000 | 0.750000000 | 0.000000000 |
| 0.166669995 | 0.833329976 | 0.094530001 |
| 0.084139563 | 0.916308045 | 0.190447569 |
| 0.998205245 | 0.752411544 | 0.291222006 |
| 0.250000000 | 0.750000000 | 0.000000000 |
| 0.416740000 | 0.833220005 | 0.094250001 |
| 0.332001269 | 0.919106245 | 0.188617349 |
| 0.245317370 | 0.756566525 | 0.282303274 |
| 0.500000000 | 0.750000000 | 0.000000000 |
| 0.666390002 | 0.832780004 | 0.094010003 |
| 0.582305312 | 0.913541198 | 0.187882453 |
| 0.501783788 | 0.749957860 | 0.286753297 |
| 0.750000000 | 0.750000000 | 0.000000000 |
| 0.916480005 | 0.833220005 | 0.094250001 |
| 0.832642019 | 0.916837752 | 0.186885864 |
| 0.752723694 | 0.759365439 | 0.282692224 |
| 0.518467784 | 0.447953105 | 0.389105886 |
| 0.411985815 | 0.588817418 | 0.343274713 |
| 0.811119974 | 0.666576862 | 0.343806446 |
| 0.335256964 | 0.191485047 | 0.342608631 |
| 0.667822957 | 0.332374990 | 0.341581792 |
| 0.424323112 | 0.354879797 | 0.482649595 |
| 0.197733328 | 0.351069123 | 0.461760461 |
| 0.350720316 | 0.255246431 | 0.496999323 |

CeO<sub>4</sub>@Ni-Volmer-FS

1.0

|               |              |              |
|---------------|--------------|--------------|
| 10.0322999954 | 0.0000000000 | 0.0000000000 |
| -5.0161499977 | 8.6882266544 | 0.0000000000 |

|        | 0.0000000000 | 0.0000000000 | 21.1434993744 |
|--------|--------------|--------------|---------------|
| Ni     | Ce           | O            | H             |
| 63     | 1            | 5            | 2             |
| Direct |              |              |               |
|        | 0.0000000000 | 0.0000000000 | 0.0000000000  |
|        | 0.166779995  | 0.083520003  | 0.094250001   |
|        | 0.083407201  | 0.167394266  | 0.187002733   |
|        | 0.993503094  | 0.002428893  | 0.280954391   |
|        | 0.250000000  | 0.000000000  | 0.000000000   |
|        | 0.416740000  | 0.083520003  | 0.094250001   |
|        | 0.333214015  | 0.167512789  | 0.188131869   |
|        | 0.248457581  | 0.001161271  | 0.291069567   |
|        | 0.500000000  | 0.000000000  | 0.000000000   |
|        | 0.666630030  | 0.083310001  | 0.093910001   |
|        | 0.583773911  | 0.166266814  | 0.187341899   |
|        | 0.498815745  | 0.990068078  | 0.281025916   |
|        | 0.750000000  | 0.000000000  | 0.000000000   |
|        | 0.916689992  | 0.083310001  | 0.093910001   |
|        | 0.832151473  | 0.166907474  | 0.188037366   |
|        | 0.748427033  | 0.000177973  | 0.281281382   |
|        | 0.000000000  | 0.250000000  | 0.000000000   |
|        | 0.167219996  | 0.333609998  | 0.094010003   |
|        | 0.087082848  | 0.417792112  | 0.188068241   |
|        | 0.995898724  | 0.249471962  | 0.281445920   |
|        | 0.250000000  | 0.250000000  | 0.000000000   |
|        | 0.416880012  | 0.333759993  | 0.094740003   |
|        | 0.335100174  | 0.417152554  | 0.190213755   |
|        | 0.240558282  | 0.243952289  | 0.283915967   |
|        | 0.500000000  | 0.250000000  | 0.000000000   |
|        | 0.666390002  | 0.333609998  | 0.094010003   |

|             |             |             |
|-------------|-------------|-------------|
| 0.583222091 | 0.416610569 | 0.189739332 |
| 0.498019665 | 0.239335954 | 0.282700270 |
| 0.750000000 | 0.250000000 | 0.000000000 |
| 0.916689992 | 0.333370000 | 0.093910001 |
| 0.833830714 | 0.415887803 | 0.187380224 |
| 0.752679467 | 0.246217936 | 0.284867764 |
| 0.000000000 | 0.500000000 | 0.000000000 |
| 0.166779995 | 0.583260000 | 0.094250001 |
| 0.081347741 | 0.668087363 | 0.188790739 |
| 0.009521968 | 0.501093149 | 0.281107813 |
| 0.250000000 | 0.500000000 | 0.000000000 |
| 0.416880012 | 0.583119988 | 0.094740003 |
| 0.332484603 | 0.665982842 | 0.189029247 |
| 0.253129095 | 0.500488818 | 0.289267629 |
| 0.500000000 | 0.500000000 | 0.000000000 |
| 0.666239977 | 0.583119988 | 0.094740003 |
| 0.581615210 | 0.663710356 | 0.189727694 |
| 0.750000000 | 0.500000000 | 0.000000000 |
| 0.916480005 | 0.583260000 | 0.094250001 |
| 0.832427323 | 0.665981650 | 0.187857002 |
| 0.760518551 | 0.501156211 | 0.282802135 |
| 0.000000000 | 0.750000000 | 0.000000000 |
| 0.166669995 | 0.833329976 | 0.094530001 |
| 0.083942369 | 0.915751696 | 0.190659955 |
| 0.996825695 | 0.750912309 | 0.291321218 |
| 0.250000000 | 0.750000000 | 0.000000000 |
| 0.416740000 | 0.833220005 | 0.094250001 |
| 0.331370711 | 0.918098927 | 0.188766837 |
| 0.244148195 | 0.754561543 | 0.282424927 |
| 0.500000000 | 0.750000000 | 0.000000000 |

|             |             |             |
|-------------|-------------|-------------|
| 0.666390002 | 0.832780004 | 0.094010003 |
| 0.581695735 | 0.912940919 | 0.187855542 |
| 0.501508534 | 0.750034273 | 0.286326349 |
| 0.750000000 | 0.750000000 | 0.000000000 |
| 0.916480005 | 0.833220005 | 0.094250001 |
| 0.832444668 | 0.916223645 | 0.186818853 |
| 0.751518011 | 0.757255554 | 0.282441705 |
| 0.535313547 | 0.459563047 | 0.390899271 |
| 0.421826303 | 0.593267739 | 0.343819410 |
| 0.805422604 | 0.661798656 | 0.344286233 |
| 0.338972867 | 0.187947720 | 0.344620407 |
| 0.669457495 | 0.330023944 | 0.341253132 |
| 0.518786430 | 0.457880586 | 0.492212385 |
| 0.151929468 | 0.324161828 | 0.325776368 |
| 0.506485701 | 0.450982124 | 0.537670135 |

CeO<sub>4</sub>@Ni-Heyrovsky-IS

1.0

|               |              |               |
|---------------|--------------|---------------|
| 10.032299954  | 0.000000000  | 0.000000000   |
| -5.0161499977 | 8.6882266544 | 0.000000000   |
| 0.000000000   | 0.000000000  | 21.1434993744 |

| Ni | Ce | O | H |
|----|----|---|---|
| 63 | 1  | 5 | 3 |

Direct

|             |             |             |
|-------------|-------------|-------------|
| 0.000000000 | 0.000000000 | 0.000000000 |
| 0.166779995 | 0.083520003 | 0.094250001 |
| 0.085386813 | 0.168591291 | 0.187358156 |
| 0.000917370 | 0.007027836 | 0.280648708 |
| 0.250000000 | 0.000000000 | 0.000000000 |
| 0.416740000 | 0.083520003 | 0.094250001 |



|             |             |             |
|-------------|-------------|-------------|
| 0.334981263 | 0.168117613 | 0.188612655 |
| 0.246483684 | 0.994256198 | 0.282927483 |
| 0.500000000 | 0.000000000 | 0.000000000 |
| 0.666630030 | 0.083310001 | 0.093910001 |
| 0.583737075 | 0.167847842 | 0.188682288 |
| 0.498046249 | 0.992000282 | 0.281111717 |
| 0.750000000 | 0.000000000 | 0.000000000 |
| 0.916689992 | 0.083310001 | 0.093910001 |
| 0.832951546 | 0.168258443 | 0.188318253 |
| 0.751524270 | 0.005092443 | 0.281788319 |
| 0.000000000 | 0.250000000 | 0.000000000 |
| 0.167219996 | 0.333609998 | 0.094010003 |
| 0.087308817 | 0.418055803 | 0.188046247 |
| 0.000325113 | 0.251052320 | 0.281430244 |
| 0.250000000 | 0.250000000 | 0.000000000 |
| 0.416880012 | 0.333759993 | 0.094740003 |
| 0.336660117 | 0.417903036 | 0.190212324 |
| 0.242550105 | 0.244805068 | 0.284205496 |
| 0.500000000 | 0.250000000 | 0.000000000 |
| 0.666390002 | 0.333609998 | 0.094010003 |
| 0.583366632 | 0.416574419 | 0.190561548 |
| 0.492730409 | 0.236347407 | 0.287322313 |
| 0.750000000 | 0.250000000 | 0.000000000 |
| 0.916689992 | 0.333370000 | 0.093910001 |
| 0.833410323 | 0.415995687 | 0.187454253 |
| 0.753456950 | 0.248606786 | 0.286080658 |
| 0.000000000 | 0.500000000 | 0.000000000 |
| 0.166779995 | 0.583260000 | 0.094250001 |
| 0.082403772 | 0.668064177 | 0.188571081 |
| 0.009767939 | 0.500704288 | 0.280997992 |

|             |             |             |
|-------------|-------------|-------------|
| 0.250000000 | 0.500000000 | 0.000000000 |
| 0.416880012 | 0.583119988 | 0.094740003 |
| 0.335003793 | 0.666629314 | 0.188721403 |
| 0.250122845 | 0.499615461 | 0.286030143 |
| 0.500000000 | 0.500000000 | 0.000000000 |
| 0.666239977 | 0.583119988 | 0.094740003 |
| 0.583289683 | 0.664634645 | 0.190305561 |
| 0.750000000 | 0.500000000 | 0.000000000 |
| 0.916480005 | 0.583260000 | 0.094250001 |
| 0.832939386 | 0.666479826 | 0.187618762 |
| 0.763257086 | 0.504668236 | 0.282215923 |
| 0.000000000 | 0.750000000 | 0.000000000 |
| 0.166669995 | 0.833329976 | 0.094530001 |
| 0.082926437 | 0.915521204 | 0.188694552 |
| 0.001959105 | 0.752780557 | 0.288886279 |
| 0.250000000 | 0.750000000 | 0.000000000 |
| 0.416740000 | 0.833220005 | 0.094250001 |
| 0.333656162 | 0.917453170 | 0.187626138 |
| 0.247289672 | 0.752768695 | 0.281798184 |
| 0.500000000 | 0.750000000 | 0.000000000 |
| 0.666390002 | 0.832780004 | 0.094010003 |
| 0.582982659 | 0.913481474 | 0.188256398 |
| 0.500684083 | 0.749754488 | 0.288318276 |
| 0.750000000 | 0.750000000 | 0.000000000 |
| 0.916480005 | 0.833220005 | 0.094250001 |
| 0.832543612 | 0.917104125 | 0.186959028 |
| 0.758468688 | 0.760242760 | 0.282722175 |
| 0.550047159 | 0.492079854 | 0.379784226 |
| 0.400059283 | 0.589755714 | 0.348244190 |
| 0.823418677 | 0.669170558 | 0.345689386 |

|             |             |             |
|-------------|-------------|-------------|
| 0.359021008 | 0.248814866 | 0.352208823 |
| 0.671953857 | 0.335986197 | 0.342123002 |
| 0.711973369 | 0.755667925 | 0.450013757 |
| 0.677446783 | 0.846827865 | 0.324798763 |
| 0.676640391 | 0.827656806 | 0.439535111 |
| 0.799826324 | 0.785015702 | 0.421242774 |

CeO<sub>4</sub>@Ni-Heyrovsky-TS

1.0

|               |              |               |
|---------------|--------------|---------------|
| 10.0322999954 | 0.0000000000 | 0.0000000000  |
| -5.0161499977 | 8.6882266544 | 0.0000000000  |
| 0.0000000000  | 0.0000000000 | 21.1434993744 |

|    |    |   |   |
|----|----|---|---|
| Ni | Ce | O | H |
| 63 | 1  | 5 | 3 |

Direct

|             |             |             |
|-------------|-------------|-------------|
| 0.000000000 | 0.000000000 | 0.000000000 |
| 0.166779995 | 0.083520003 | 0.094250001 |
| 0.084133677 | 0.166690499 | 0.187073737 |
| 0.996857166 | 0.002781429 | 0.280218899 |
| 0.250000000 | 0.000000000 | 0.000000000 |
| 0.416740000 | 0.083520003 | 0.094250001 |
| 0.334840059 | 0.166815177 | 0.188241169 |
| 0.248418614 | 0.995830715 | 0.289875478 |
| 0.500000000 | 0.000000000 | 0.000000000 |
| 0.666630030 | 0.083310001 | 0.093910001 |
| 0.583986819 | 0.165830433 | 0.188441560 |
| 0.498904645 | 0.988510609 | 0.280913770 |
| 0.750000000 | 0.000000000 | 0.000000000 |
| 0.916689992 | 0.083310001 | 0.093910001 |
| 0.831748724 | 0.165796816 | 0.189190477 |

|             |             |             |
|-------------|-------------|-------------|
| 0.748767078 | 0.998199999 | 0.282771736 |
| 0.000000000 | 0.250000000 | 0.000000000 |
| 0.167219996 | 0.333609998 | 0.094010003 |
| 0.087570444 | 0.416038245 | 0.188012168 |
| 0.999659657 | 0.248795897 | 0.281786382 |
| 0.250000000 | 0.250000000 | 0.000000000 |
| 0.416880012 | 0.333759993 | 0.094740003 |
| 0.335996836 | 0.415777028 | 0.189933047 |
| 0.242978409 | 0.243292823 | 0.284178257 |
| 0.500000000 | 0.250000000 | 0.000000000 |
| 0.666390002 | 0.333609998 | 0.094010003 |
| 0.582733333 | 0.414574653 | 0.189858571 |
| 0.498460710 | 0.240624323 | 0.286516458 |
| 0.750000000 | 0.250000000 | 0.000000000 |
| 0.916689992 | 0.333370000 | 0.093910001 |
| 0.833776712 | 0.413543910 | 0.187185958 |
| 0.752849102 | 0.247405633 | 0.287834078 |
| 0.000000000 | 0.500000000 | 0.000000000 |
| 0.166779995 | 0.583260000 | 0.094250001 |
| 0.082772985 | 0.665873051 | 0.188032508 |
| 0.010833555 | 0.497964263 | 0.280710459 |
| 0.250000000 | 0.500000000 | 0.000000000 |
| 0.416880012 | 0.583119988 | 0.094740003 |
| 0.333644301 | 0.664962649 | 0.188549429 |
| 0.251855075 | 0.492629021 | 0.287214994 |
| 0.500000000 | 0.500000000 | 0.000000000 |
| 0.666239977 | 0.583119988 | 0.094740003 |
| 0.582876265 | 0.663016737 | 0.189196795 |
| 0.750000000 | 0.500000000 | 0.000000000 |
| 0.916480005 | 0.583260000 | 0.094250001 |

|             |             |             |
|-------------|-------------|-------------|
| 0.833536208 | 0.664452791 | 0.186446071 |
| 0.760862350 | 0.499551237 | 0.280691564 |
| 0.000000000 | 0.750000000 | 0.000000000 |
| 0.166669995 | 0.833329976 | 0.094530001 |
| 0.085061677 | 0.915715396 | 0.189272702 |
| 0.005613592 | 0.750340402 | 0.286450595 |
| 0.250000000 | 0.750000000 | 0.000000000 |
| 0.416740000 | 0.833220005 | 0.094250001 |
| 0.332531303 | 0.916822076 | 0.188360184 |
| 0.248279572 | 0.750649035 | 0.281808943 |
| 0.500000000 | 0.750000000 | 0.000000000 |
| 0.666390002 | 0.832780004 | 0.094010003 |
| 0.582186520 | 0.911787927 | 0.188105926 |
| 0.501658857 | 0.741585493 | 0.285420984 |
| 0.750000000 | 0.750000000 | 0.000000000 |
| 0.916480005 | 0.833220005 | 0.094250001 |
| 0.832770705 | 0.916505873 | 0.186648801 |
| 0.758028924 | 0.756197214 | 0.279420435 |
| 0.587072313 | 0.519338250 | 0.393091381 |
| 0.418961883 | 0.575799346 | 0.342026919 |
| 0.828527510 | 0.670290053 | 0.340575606 |
| 0.327011168 | 0.171599850 | 0.343290001 |
| 0.669812441 | 0.338117748 | 0.344046414 |
| 0.713416457 | 0.732142866 | 0.450074732 |
| 0.628132463 | 0.931756616 | 0.376150131 |
| 0.657970369 | 0.882912219 | 0.393043041 |
| 0.820573092 | 0.805590272 | 0.439040333 |

CeO<sub>4</sub>@Ni-Heyrovsky-FS

1.0

|               |              |               |
|---------------|--------------|---------------|
| 10.0322999954 | 0.0000000000 | 0.0000000000  |
| -5.0161499977 | 8.6882266544 | 0.0000000000  |
| 0.0000000000  | 0.0000000000 | 21.1434993744 |

|    |    |   |   |
|----|----|---|---|
| Ni | Ce | O | H |
| 63 | 1  | 5 | 3 |

Direct

|             |             |             |
|-------------|-------------|-------------|
| 0.000000000 | 0.000000000 | 0.000000000 |
| 0.166779995 | 0.083520003 | 0.094250001 |
| 0.083411604 | 0.166866094 | 0.186899498 |
| 0.997489512 | 0.003678225 | 0.280541420 |
| 0.250000000 | 0.000000000 | 0.000000000 |
| 0.416740000 | 0.083520003 | 0.094250001 |
| 0.334169596 | 0.167213053 | 0.187875435 |
| 0.248822272 | 0.002289192 | 0.291193932 |
| 0.500000000 | 0.000000000 | 0.000000000 |
| 0.666630030 | 0.083310001 | 0.093910001 |
| 0.584200561 | 0.165332675 | 0.187485352 |
| 0.496624947 | 0.988707364 | 0.280914217 |
| 0.750000000 | 0.000000000 | 0.000000000 |
| 0.916689992 | 0.083310001 | 0.093910001 |
| 0.832583427 | 0.166172326 | 0.188636124 |
| 0.749076843 | 0.999926746 | 0.284570247 |
| 0.000000000 | 0.250000000 | 0.000000000 |
| 0.167219996 | 0.333609998 | 0.094010003 |
| 0.086816736 | 0.417365402 | 0.188064232 |
| 0.001447791 | 0.251911521 | 0.281376719 |
| 0.250000000 | 0.250000000 | 0.000000000 |
| 0.416880012 | 0.333759993 | 0.094740003 |
| 0.336113274 | 0.417808354 | 0.189747602 |
| 0.243099391 | 0.247957602 | 0.282307357 |

|             |             |             |
|-------------|-------------|-------------|
| 0.500000000 | 0.250000000 | 0.000000000 |
| 0.666390002 | 0.333609998 | 0.094010003 |
| 0.583653092 | 0.416026145 | 0.189826161 |
| 0.499132961 | 0.238560125 | 0.282973826 |
| 0.750000000 | 0.250000000 | 0.000000000 |
| 0.916689992 | 0.333370000 | 0.093910001 |
| 0.833883405 | 0.415573955 | 0.187371656 |
| 0.754120648 | 0.248491898 | 0.284502476 |
| 0.000000000 | 0.500000000 | 0.000000000 |
| 0.166779995 | 0.583260000 | 0.094250001 |
| 0.081496209 | 0.668054879 | 0.188670725 |
| 0.010292329 | 0.501027822 | 0.281080872 |
| 0.250000000 | 0.500000000 | 0.000000000 |
| 0.416880012 | 0.583119988 | 0.094740003 |
| 0.333272070 | 0.666743815 | 0.188874334 |
| 0.251091540 | 0.497567952 | 0.287232608 |
| 0.500000000 | 0.500000000 | 0.000000000 |
| 0.666239977 | 0.583119988 | 0.094740003 |
| 0.581899822 | 0.663817346 | 0.189626649 |
| 0.750000000 | 0.500000000 | 0.000000000 |
| 0.916480005 | 0.583260000 | 0.094250001 |
| 0.832867622 | 0.666064262 | 0.187731639 |
| 0.760964811 | 0.500823379 | 0.283064336 |
| 0.000000000 | 0.750000000 | 0.000000000 |
| 0.166669995 | 0.833329976 | 0.094530001 |
| 0.084046811 | 0.915551960 | 0.190476045 |
| 0.997381032 | 0.750951529 | 0.291359574 |
| 0.250000000 | 0.750000000 | 0.000000000 |
| 0.416740000 | 0.833220005 | 0.094250001 |
| 0.331972629 | 0.918160856 | 0.188606277 |

|             |             |             |
|-------------|-------------|-------------|
| 0.243922785 | 0.754752576 | 0.282203466 |
| 0.500000000 | 0.750000000 | 0.000000000 |
| 0.666390002 | 0.832780004 | 0.094010003 |
| 0.583553493 | 0.913408339 | 0.188610449 |
| 0.498490036 | 0.745949805 | 0.286596596 |
| 0.750000000 | 0.750000000 | 0.000000000 |
| 0.916480005 | 0.833220005 | 0.094250001 |
| 0.832085371 | 0.916591465 | 0.187340707 |
| 0.751250207 | 0.754299104 | 0.281164020 |
| 0.538621306 | 0.463013202 | 0.390613586 |
| 0.412319392 | 0.585385382 | 0.344092518 |
| 0.806213200 | 0.662675679 | 0.344313323 |
| 0.337823272 | 0.193643108 | 0.344208747 |
| 0.669548154 | 0.330010116 | 0.341840774 |
| 0.543099701 | 0.475362182 | 0.492311895 |
| 0.803748310 | 0.044904519 | 0.356439352 |
| 0.709590614 | 0.966729879 | 0.358075827 |
| 0.549467504 | 0.480381995 | 0.537951887 |

Ni(111)

1.0

|               |              |               |
|---------------|--------------|---------------|
| 10.0492000580 | 0.0000000000 | 0.0000000000  |
| -5.0246000290 | 8.7028625379 | 0.0000000000  |
| 0.0000000000  | 0.0000000000 | 24.1026000977 |

Ni

48

Direct

|             |             |             |
|-------------|-------------|-------------|
| 0.166669995 | 0.083329998 | 0.000000000 |
| 0.083330803 | 0.166669190 | 0.084129207 |
| 0.000002350 | 0.999997675 | 0.168073788 |



|             |             |             |
|-------------|-------------|-------------|
| 0.416669995 | 0.083329998 | 0.000000000 |
| 0.333330810 | 0.166669190 | 0.084129207 |
| 0.250002354 | 0.999997675 | 0.168073788 |
| 0.666670024 | 0.083329998 | 0.000000000 |
| 0.583330810 | 0.166669190 | 0.084129207 |
| 0.500002325 | 0.999997675 | 0.168073788 |
| 0.916670024 | 0.083329998 | 0.000000000 |
| 0.833330810 | 0.166669190 | 0.084129207 |
| 0.750002325 | 0.999997675 | 0.168073788 |
| 0.166669995 | 0.333330005 | 0.000000000 |
| 0.083330803 | 0.416669190 | 0.084129207 |
| 0.000002350 | 0.249997646 | 0.168073788 |
| 0.416669995 | 0.333330005 | 0.000000000 |
| 0.333330810 | 0.416669190 | 0.084129207 |
| 0.250002354 | 0.249997646 | 0.168073788 |
| 0.666670024 | 0.333330005 | 0.000000000 |
| 0.583330810 | 0.416669190 | 0.084129207 |
| 0.500002325 | 0.249997646 | 0.168073788 |
| 0.916670024 | 0.333330005 | 0.000000000 |
| 0.833330810 | 0.416669190 | 0.084129207 |
| 0.750002325 | 0.249997646 | 0.168073788 |
| 0.166669995 | 0.583329976 | 0.000000000 |
| 0.083330803 | 0.666669190 | 0.084129207 |
| 0.000002350 | 0.499997646 | 0.168073788 |
| 0.416669995 | 0.583329976 | 0.000000000 |
| 0.333330810 | 0.666669190 | 0.084129207 |
| 0.250002354 | 0.499997646 | 0.168073788 |
| 0.666670024 | 0.583329976 | 0.000000000 |
| 0.583330810 | 0.666669190 | 0.084129207 |
| 0.500002325 | 0.499997646 | 0.168073788 |

|             |             |             |
|-------------|-------------|-------------|
| 0.916670024 | 0.583329976 | 0.000000000 |
| 0.833330810 | 0.666669190 | 0.084129207 |
| 0.750002325 | 0.499997646 | 0.168073788 |
| 0.166669995 | 0.833329976 | 0.000000000 |
| 0.083330803 | 0.916669190 | 0.084129207 |
| 0.000002350 | 0.749997675 | 0.168073788 |
| 0.416669995 | 0.833329976 | 0.000000000 |
| 0.333330810 | 0.916669190 | 0.084129207 |
| 0.250002354 | 0.749997675 | 0.168073788 |
| 0.666670024 | 0.833329976 | 0.000000000 |
| 0.583330810 | 0.916669190 | 0.084129207 |
| 0.500002325 | 0.749997675 | 0.168073788 |
| 0.916670024 | 0.833329976 | 0.000000000 |
| 0.833330810 | 0.916669190 | 0.084129207 |
| 0.750002325 | 0.749997675 | 0.168073788 |

Ni(111)-H

1.0

|               |              |               |
|---------------|--------------|---------------|
| 10.0492000580 | 0.000000000  | 0.000000000   |
| -5.0246000290 | 8.7028625379 | 0.000000000   |
| 0.000000000   | 0.000000000  | 24.1026000977 |

Ni

48

Direct

|             |             |             |
|-------------|-------------|-------------|
| 0.166669995 | 0.083329998 | 0.000000000 |
| 0.083330803 | 0.166669190 | 0.084129207 |
| 0.000002350 | 0.999997675 | 0.168073788 |
| 0.416669995 | 0.083329998 | 0.000000000 |
| 0.333330810 | 0.166669190 | 0.084129207 |
| 0.250002354 | 0.999997675 | 0.168073788 |

|             |             |             |
|-------------|-------------|-------------|
| 0.666670024 | 0.083329998 | 0.000000000 |
| 0.583330810 | 0.166669190 | 0.084129207 |
| 0.500002325 | 0.999997675 | 0.168073788 |
| 0.916670024 | 0.083329998 | 0.000000000 |
| 0.833330810 | 0.166669190 | 0.084129207 |
| 0.750002325 | 0.999997675 | 0.168073788 |
| 0.166669995 | 0.333330005 | 0.000000000 |
| 0.083330803 | 0.416669190 | 0.084129207 |
| 0.000002350 | 0.249997646 | 0.168073788 |
| 0.416669995 | 0.333330005 | 0.000000000 |
| 0.333330810 | 0.416669190 | 0.084129207 |
| 0.250002354 | 0.249997646 | 0.168073788 |
| 0.666670024 | 0.333330005 | 0.000000000 |
| 0.583330810 | 0.416669190 | 0.084129207 |
| 0.500002325 | 0.249997646 | 0.168073788 |
| 0.916670024 | 0.333330005 | 0.000000000 |
| 0.833330810 | 0.416669190 | 0.084129207 |
| 0.750002325 | 0.249997646 | 0.168073788 |
| 0.166669995 | 0.583329976 | 0.000000000 |
| 0.083330803 | 0.666669190 | 0.084129207 |
| 0.000002350 | 0.499997646 | 0.168073788 |
| 0.416669995 | 0.583329976 | 0.000000000 |
| 0.333330810 | 0.666669190 | 0.084129207 |
| 0.250002354 | 0.499997646 | 0.168073788 |
| 0.666670024 | 0.583329976 | 0.000000000 |
| 0.583330810 | 0.666669190 | 0.084129207 |
| 0.500002325 | 0.499997646 | 0.168073788 |
| 0.916670024 | 0.583329976 | 0.000000000 |
| 0.833330810 | 0.666669190 | 0.084129207 |
| 0.750002325 | 0.499997646 | 0.168073788 |

|             |             |             |
|-------------|-------------|-------------|
| 0.166669995 | 0.833329976 | 0.000000000 |
| 0.083330803 | 0.916669190 | 0.084129207 |
| 0.000002350 | 0.749997675 | 0.168073788 |
| 0.416669995 | 0.833329976 | 0.000000000 |
| 0.333330810 | 0.916669190 | 0.084129207 |
| 0.250002354 | 0.749997675 | 0.168073788 |
| 0.666670024 | 0.833329976 | 0.000000000 |
| 0.583330810 | 0.916669190 | 0.084129207 |
| 0.500002325 | 0.749997675 | 0.168073788 |
| 0.916670024 | 0.833329976 | 0.000000000 |
| 0.833330810 | 0.916669190 | 0.084129207 |
| 0.750002325 | 0.749997675 | 0.168073788 |

Ni(111)-OH

1.0

|               |              |               |
|---------------|--------------|---------------|
| 9.9672002792  | 0.000000000  | 0.000000000   |
| -4.9836001396 | 8.6318486464 | 0.000000000   |
| 0.000000000   | 0.000000000  | 26.1037006378 |

|    |   |   |
|----|---|---|
| Ni | H | O |
| 64 | 1 | 1 |

Direct

|             |             |             |
|-------------|-------------|-------------|
| 0.000000000 | 0.000000000 | 0.000000000 |
| 0.000000000 | 0.250000000 | 0.000000000 |
| 0.000000000 | 0.500000000 | 0.000000000 |
| 0.000000000 | 0.750000000 | 0.000000000 |
| 0.250000000 | 0.000000000 | 0.000000000 |
| 0.250000000 | 0.250000000 | 0.000000000 |
| 0.250000000 | 0.500000000 | 0.000000000 |
| 0.250000000 | 0.750000000 | 0.000000000 |
| 0.500000000 | 0.000000000 | 0.000000000 |

|             |             |             |
|-------------|-------------|-------------|
| 0.500000000 | 0.250000000 | 0.000000000 |
| 0.500000000 | 0.500000000 | 0.000000000 |
| 0.500000000 | 0.750000000 | 0.000000000 |
| 0.750000000 | 0.000000000 | 0.000000000 |
| 0.750000000 | 0.250000000 | 0.000000000 |
| 0.750000000 | 0.500000000 | 0.000000000 |
| 0.750000000 | 0.750000000 | 0.000000000 |
| 0.166669995 | 0.083329998 | 0.077940002 |
| 0.166669995 | 0.333330005 | 0.077940002 |
| 0.166669995 | 0.583329976 | 0.077940002 |
| 0.166669995 | 0.833329976 | 0.077940002 |
| 0.416669995 | 0.083329998 | 0.077940002 |
| 0.416669995 | 0.333330005 | 0.077940002 |
| 0.416669995 | 0.583329976 | 0.077940002 |
| 0.416669995 | 0.833329976 | 0.077940002 |
| 0.666670024 | 0.083329998 | 0.077940002 |
| 0.666670024 | 0.333330005 | 0.077940002 |
| 0.666670024 | 0.583329976 | 0.077940002 |
| 0.666670024 | 0.833329976 | 0.077940002 |
| 0.916670024 | 0.083329998 | 0.077940002 |
| 0.916670024 | 0.333330005 | 0.077940002 |
| 0.916670024 | 0.583329976 | 0.077940002 |
| 0.916670024 | 0.833329976 | 0.077940002 |
| 0.083463669 | 0.167203575 | 0.154920295 |
| 0.086314164 | 0.418369710 | 0.156391487 |
| 0.083464958 | 0.666498840 | 0.154926538 |
| 0.083526291 | 0.916964829 | 0.155254304 |
| 0.333925337 | 0.167235717 | 0.154946044 |
| 0.333994806 | 0.417643666 | 0.155692726 |
| 0.333900601 | 0.666599989 | 0.155581772 |

|             |             |             |
|-------------|-------------|-------------|
| 0.334012300 | 0.917061269 | 0.154925078 |
| 0.583594203 | 0.166996688 | 0.154858500 |
| 0.582242370 | 0.418290198 | 0.156396389 |
| 0.582917869 | 0.666611493 | 0.155604944 |
| 0.582257152 | 0.914508820 | 0.156269103 |
| 0.833573759 | 0.167051822 | 0.154810205 |
| 0.833639205 | 0.416911483 | 0.154851109 |
| 0.833242118 | 0.666511893 | 0.154926240 |
| 0.833292186 | 0.917060673 | 0.154889539 |
| 0.250297070 | 0.000517439 | 0.231937602 |
| 0.247426644 | 0.244815230 | 0.231093302 |
| 0.242298096 | 0.496681958 | 0.234775633 |
| 0.247443631 | 0.753468513 | 0.231044203 |
| 0.500743449 | 0.002795652 | 0.231730998 |
| 0.500508964 | 0.248862341 | 0.231824532 |
| 0.504487693 | 0.496783257 | 0.234718665 |
| 0.504535913 | 0.758943379 | 0.234462902 |
| 0.752213478 | 0.002687937 | 0.231694117 |
| 0.750374675 | 0.250551164 | 0.231610566 |
| 0.752113640 | 0.500251770 | 0.231796354 |
| 0.756170869 | 0.753434837 | 0.231016204 |
| 0.000378249 | 0.000500350 | 0.231892556 |
| 0.998305798 | 0.248820588 | 0.231774509 |
| 0.998279929 | 0.500289142 | 0.231795773 |
| 0.000315101 | 0.750519156 | 0.231929943 |
| 0.420124590 | 0.588780522 | 0.320294440 |
| 0.417835891 | 0.585329056 | 0.283004314 |

Ni(111)-H<sub>2</sub>O

1.0

|               |              |               |
|---------------|--------------|---------------|
| 9.9672002792  | 0.0000000000 | 0.0000000000  |
| -4.9836001396 | 8.6318486464 | 0.0000000000  |
| 0.0000000000  | 0.0000000000 | 26.1037006378 |

|    |   |   |
|----|---|---|
| Ni | O | H |
| 64 | 1 | 2 |

Direct

|              |              |              |
|--------------|--------------|--------------|
| 0.0000000000 | 0.0000000000 | 0.0000000000 |
| 0.0000000000 | 0.2500000000 | 0.0000000000 |
| 0.0000000000 | 0.5000000000 | 0.0000000000 |
| 0.0000000000 | 0.7500000000 | 0.0000000000 |
| 0.2500000000 | 0.0000000000 | 0.0000000000 |
| 0.2500000000 | 0.2500000000 | 0.0000000000 |
| 0.2500000000 | 0.5000000000 | 0.0000000000 |
| 0.2500000000 | 0.7500000000 | 0.0000000000 |
| 0.5000000000 | 0.0000000000 | 0.0000000000 |
| 0.5000000000 | 0.2500000000 | 0.0000000000 |
| 0.5000000000 | 0.5000000000 | 0.0000000000 |
| 0.5000000000 | 0.7500000000 | 0.0000000000 |
| 0.7500000000 | 0.0000000000 | 0.0000000000 |
| 0.7500000000 | 0.2500000000 | 0.0000000000 |
| 0.7500000000 | 0.5000000000 | 0.0000000000 |
| 0.7500000000 | 0.7500000000 | 0.0000000000 |
| 0.166667506  | 0.083332501  | 0.077940002  |
| 0.166667506  | 0.333332509  | 0.077940002  |
| 0.166667506  | 0.583332479  | 0.077940002  |
| 0.166667506  | 0.833332479  | 0.077940002  |
| 0.416667491  | 0.083332501  | 0.077940002  |
| 0.416667491  | 0.333332509  | 0.077940002  |
| 0.416667491  | 0.583332479  | 0.077940002  |
| 0.416667491  | 0.833332479  | 0.077940002  |

|             |             |             |
|-------------|-------------|-------------|
| 0.666667521 | 0.083332501 | 0.077940002 |
| 0.666667521 | 0.333332509 | 0.077940002 |
| 0.666667521 | 0.583332479 | 0.077940002 |
| 0.666667521 | 0.833332479 | 0.077940002 |
| 0.916667521 | 0.083332501 | 0.077940002 |
| 0.916667521 | 0.333332509 | 0.077940002 |
| 0.916667521 | 0.583332479 | 0.077940002 |
| 0.916667521 | 0.833332479 | 0.077940002 |
| 0.083364956 | 0.166882098 | 0.155027032 |
| 0.083128318 | 0.416441858 | 0.154925108 |
| 0.083298869 | 0.666645050 | 0.155203149 |
| 0.083261132 | 0.916704476 | 0.155179769 |
| 0.333342344 | 0.166759431 | 0.155044496 |
| 0.334672421 | 0.417378783 | 0.156046882 |
| 0.333355874 | 0.666734397 | 0.154916018 |
| 0.333348125 | 0.916683733 | 0.155195877 |
| 0.583368540 | 0.166925177 | 0.155086875 |
| 0.582501113 | 0.417492032 | 0.156245485 |
| 0.582690299 | 0.665428519 | 0.155970171 |
| 0.583511829 | 0.916728795 | 0.154975846 |
| 0.833281159 | 0.166653946 | 0.155141205 |
| 0.833065152 | 0.416571617 | 0.155058473 |
| 0.833290756 | 0.666620672 | 0.154958695 |
| 0.833203077 | 0.916808128 | 0.154926851 |
| 0.249701887 | 0.999535501 | 0.231863022 |
| 0.248188570 | 0.248115227 | 0.231419787 |
| 0.247992039 | 0.500366867 | 0.231147096 |
| 0.249822035 | 0.750096977 | 0.231940046 |
| 0.500126719 | 0.999945343 | 0.231894866 |
| 0.499626458 | 0.248058259 | 0.231567353 |



|             |             |             |
|-------------|-------------|-------------|
| 0.499928355 | 0.499824971 | 0.236716017 |
| 0.499573797 | 0.751675069 | 0.231277213 |
| 0.749986053 | 0.999997377 | 0.231844470 |
| 0.750065029 | 0.249945477 | 0.231809005 |
| 0.752077699 | 0.500560343 | 0.231474176 |
| 0.752164364 | 0.751865923 | 0.231182516 |
| 0.999766767 | 0.000078417 | 0.231874168 |
| 0.999867320 | 0.250074327 | 0.231835127 |
| 0.999958098 | 0.499875754 | 0.231909513 |
| 0.000304388 | 0.750219703 | 0.231913775 |
| 0.497871131 | 0.508066952 | 0.319146186 |
| 0.404083729 | 0.513493955 | 0.326220989 |
| 0.584516287 | 0.611708522 | 0.326838493 |

Ce@Ni-H<sub>top</sub>

1.0

|               |              |               |
|---------------|--------------|---------------|
| 10.0322999954 | 0.0000000000 | 0.0000000000  |
| -5.0161499977 | 8.6882266544 | 0.0000000000  |
| 0.0000000000  | 0.0000000000 | 21.1434993744 |

| Ni | Ce | H |
|----|----|---|
| 63 | 1  | 1 |

Direct

|             |             |             |
|-------------|-------------|-------------|
| 0.000000000 | 0.000000000 | 0.000000000 |
| 0.166779995 | 0.083520003 | 0.094250001 |
| 0.082959861 | 0.167101353 | 0.187563896 |
| 0.999879003 | 0.000160004 | 0.284015030 |
| 0.250000000 | 0.000000000 | 0.000000000 |
| 0.416740000 | 0.083520003 | 0.094250001 |
| 0.334000379 | 0.167902663 | 0.188030154 |
| 0.250428379 | 0.000212882 | 0.283419907 |

|             |             |             |
|-------------|-------------|-------------|
| 0.500000000 | 0.000000000 | 0.000000000 |
| 0.666630030 | 0.083310001 | 0.093910001 |
| 0.584310353 | 0.167058930 | 0.187447518 |
| 0.500709713 | 0.000000000 | 0.283940703 |
| 0.750000000 | 0.000000000 | 0.000000000 |
| 0.916689992 | 0.083310001 | 0.093910001 |
| 0.833406329 | 0.166525677 | 0.188678786 |
| 0.749345601 | 0.998291433 | 0.283342779 |
| 0.000000000 | 0.250000000 | 0.000000000 |
| 0.167219996 | 0.333609998 | 0.094010003 |
| 0.082971260 | 0.415675759 | 0.187560067 |
| 0.001674469 | 0.250618786 | 0.283373624 |
| 0.250000000 | 0.250000000 | 0.000000000 |
| 0.416880012 | 0.333759993 | 0.094740003 |
| 0.335765690 | 0.417827427 | 0.190166667 |
| 0.248169184 | 0.245886058 | 0.282071441 |
| 0.500000000 | 0.250000000 | 0.000000000 |
| 0.666390002 | 0.333609998 | 0.094010003 |
| 0.582178652 | 0.417823583 | 0.190152302 |
| 0.498359531 | 0.245692894 | 0.281994611 |
| 0.750000000 | 0.250000000 | 0.000000000 |
| 0.916689992 | 0.333370000 | 0.093910001 |
| 0.832865238 | 0.415602118 | 0.187458411 |
| 0.749378145 | 0.250630319 | 0.283318430 |
| 0.000000000 | 0.500000000 | 0.000000000 |
| 0.166779995 | 0.583260000 | 0.094250001 |
| 0.083238818 | 0.666403830 | 0.188237116 |
| 0.999928653 | 0.499297291 | 0.283957571 |
| 0.250000000 | 0.500000000 | 0.000000000 |
| 0.416880012 | 0.583119988 | 0.094740003 |

|             |             |             |
|-------------|-------------|-------------|
| 0.333934128 | 0.665945232 | 0.188092738 |
| 0.247950792 | 0.501659811 | 0.282128870 |
| 0.500000000 | 0.500000000 | 0.000000000 |
| 0.666239977 | 0.583119988 | 0.094740003 |
| 0.582192063 | 0.664252996 | 0.190172821 |
| 0.750000000 | 0.500000000 | 0.000000000 |
| 0.916480005 | 0.583260000 | 0.094250001 |
| 0.832204700 | 0.666069508 | 0.188009053 |
| 0.754440606 | 0.501793683 | 0.281984925 |
| 0.000000000 | 0.750000000 | 0.000000000 |
| 0.166669995 | 0.833329976 | 0.094530001 |
| 0.083233856 | 0.916771531 | 0.188290626 |
| 0.999913394 | 0.749737859 | 0.283399343 |
| 0.250000000 | 0.750000000 | 0.000000000 |
| 0.416740000 | 0.833220005 | 0.094250001 |
| 0.333520591 | 0.916639149 | 0.188294128 |
| 0.250284165 | 0.749542475 | 0.283485562 |
| 0.500000000 | 0.750000000 | 0.000000000 |
| 0.666390002 | 0.832780004 | 0.094010003 |
| 0.584245622 | 0.916956604 | 0.187551647 |
| 0.498246789 | 0.751933038 | 0.282109648 |
| 0.750000000 | 0.750000000 | 0.000000000 |
| 0.916480005 | 0.833220005 | 0.094250001 |
| 0.832884610 | 0.917085946 | 0.187530532 |
| 0.754325151 | 0.752034426 | 0.282027215 |
| 0.500657678 | 0.499932587 | 0.357935756 |
| 0.502430856 | 0.495588422 | 0.458124191 |

Ce@Ni-H<sub>bridge</sub>

1.0

|               |              |               |
|---------------|--------------|---------------|
| 10.0322999954 | 0.0000000000 | 0.0000000000  |
| -5.0161499977 | 8.6882266544 | 0.0000000000  |
| 0.0000000000  | 0.0000000000 | 21.1434993744 |

|    |    |   |
|----|----|---|
| Ni | Ce | H |
| 63 | 1  | 1 |

Direct

|              |              |              |
|--------------|--------------|--------------|
| 0.0000000000 | 0.0000000000 | 0.0000000000 |
| 0.166779995  | 0.083520003  | 0.094250001  |
| 0.082303122  | 0.167558283  | 0.187302843  |
| 0.999574780  | 0.000453051  | 0.284172684  |
| 0.250000000  | 0.000000000  | 0.000000000  |
| 0.416740000  | 0.083520003  | 0.094250001  |
| 0.333706647  | 0.167828247  | 0.187822819  |
| 0.249415025  | 0.999579191  | 0.283394039  |
| 0.500000000  | 0.000000000  | 0.000000000  |
| 0.666630030  | 0.083310001  | 0.093910001  |
| 0.584515154  | 0.167601481  | 0.187553123  |
| 0.500496626  | 0.000985139  | 0.283956796  |
| 0.750000000  | 0.000000000  | 0.000000000  |
| 0.916689992  | 0.083310001  | 0.093910001  |
| 0.833267987  | 0.167635649  | 0.188494459  |
| 0.749515831  | 0.000274818  | 0.283235162  |
| 0.000000000  | 0.250000000  | 0.000000000  |
| 0.167219996  | 0.333609998  | 0.094010003  |
| 0.082808442  | 0.416100889  | 0.187543437  |
| 0.999951303  | 0.249221236  | 0.283049494  |
| 0.250000000  | 0.250000000  | 0.000000000  |
| 0.416880012  | 0.333759993  | 0.094740003  |
| 0.335274458  | 0.418042302  | 0.190600961  |
| 0.244555041  | 0.242512405  | 0.281582296  |

|             |             |             |
|-------------|-------------|-------------|
| 0.500000000 | 0.250000000 | 0.000000000 |
| 0.666390002 | 0.333609998 | 0.094010003 |
| 0.582347989 | 0.418136537 | 0.190253988 |
| 0.496879816 | 0.244085789 | 0.281764716 |
| 0.750000000 | 0.250000000 | 0.000000000 |
| 0.916689992 | 0.333370000 | 0.093910001 |
| 0.834036529 | 0.416817635 | 0.187790528 |
| 0.749210656 | 0.251454175 | 0.283260822 |
| 0.000000000 | 0.500000000 | 0.000000000 |
| 0.166779995 | 0.583260000 | 0.094250001 |
| 0.083369710 | 0.666402221 | 0.188221887 |
| 0.998487949 | 0.498889983 | 0.284869105 |
| 0.250000000 | 0.500000000 | 0.000000000 |
| 0.416880012 | 0.583119988 | 0.094740003 |
| 0.334084064 | 0.666400313 | 0.187830716 |
| 0.248108074 | 0.501174927 | 0.282549232 |
| 0.500000000 | 0.500000000 | 0.000000000 |
| 0.666239977 | 0.583119988 | 0.094740003 |
| 0.581716299 | 0.664415538 | 0.190345511 |
| 0.750000000 | 0.500000000 | 0.000000000 |
| 0.916480005 | 0.583260000 | 0.094250001 |
| 0.832269132 | 0.666393101 | 0.187812388 |
| 0.755662799 | 0.503417730 | 0.281901419 |
| 0.000000000 | 0.750000000 | 0.000000000 |
| 0.166669995 | 0.833329976 | 0.094530001 |
| 0.083063014 | 0.916706562 | 0.188225821 |
| 0.999932051 | 0.751064062 | 0.283218414 |
| 0.250000000 | 0.750000000 | 0.000000000 |
| 0.416740000 | 0.833220005 | 0.094250001 |
| 0.333026856 | 0.916138887 | 0.188548952 |

|             |             |             |
|-------------|-------------|-------------|
| 0.250321031 | 0.751921356 | 0.284327805 |
| 0.500000000 | 0.750000000 | 0.000000000 |
| 0.666390002 | 0.832780004 | 0.094010003 |
| 0.584139466 | 0.917869210 | 0.187319934 |
| 0.500043690 | 0.756459534 | 0.281686366 |
| 0.750000000 | 0.750000000 | 0.000000000 |
| 0.916480005 | 0.833220005 | 0.094250001 |
| 0.832747638 | 0.917668343 | 0.187510043 |
| 0.756403208 | 0.755224526 | 0.281903028 |
| 0.499428958 | 0.500284076 | 0.339238882 |
| 0.169174597 | 0.583553612 | 0.327574819 |

Ce@Ni-H<sub>hcp</sub>

1.0

|               |              |               |
|---------------|--------------|---------------|
| 10.0322999954 | 0.0000000000 | 0.0000000000  |
| -5.0161499977 | 8.6882266544 | 0.0000000000  |
| 0.0000000000  | 0.0000000000 | 21.1434993744 |

|    |    |   |
|----|----|---|
| Ni | Ce | H |
| 63 | 1  | 1 |

Direct

|             |             |             |
|-------------|-------------|-------------|
| 0.000000000 | 0.000000000 | 0.000000000 |
| 0.166779995 | 0.083520003 | 0.094250001 |
| 0.083734907 | 0.167607665 | 0.187554151 |
| 0.000169635 | 0.999584198 | 0.283992678 |
| 0.250000000 | 0.000000000 | 0.000000000 |
| 0.416740000 | 0.083520003 | 0.094250001 |
| 0.334174424 | 0.168223485 | 0.188173696 |
| 0.250572681 | 0.999496043 | 0.283349514 |
| 0.500000000 | 0.000000000 | 0.000000000 |
| 0.666630030 | 0.083310001 | 0.093910001 |

|             |             |             |
|-------------|-------------|-------------|
| 0.585196018 | 0.167300373 | 0.187604129 |
| 0.501141489 | 0.000574224 | 0.284167141 |
| 0.750000000 | 0.000000000 | 0.000000000 |
| 0.916689992 | 0.083310001 | 0.093910001 |
| 0.835192382 | 0.167561889 | 0.188747689 |
| 0.750721276 | 0.999769151 | 0.283186078 |
| 0.000000000 | 0.250000000 | 0.000000000 |
| 0.167219996 | 0.333609998 | 0.094010003 |
| 0.083829314 | 0.416108310 | 0.187596351 |
| 0.000380231 | 0.250118762 | 0.284013331 |
| 0.250000000 | 0.250000000 | 0.000000000 |
| 0.416880012 | 0.333759993 | 0.094740003 |
| 0.336309582 | 0.418039560 | 0.189881966 |
| 0.248808339 | 0.244671553 | 0.282931864 |
| 0.500000000 | 0.250000000 | 0.000000000 |
| 0.666390002 | 0.333609998 | 0.094010003 |
| 0.582770526 | 0.418033272 | 0.190275177 |
| 0.499249101 | 0.244243264 | 0.281924456 |
| 0.750000000 | 0.250000000 | 0.000000000 |
| 0.916689992 | 0.333370000 | 0.093910001 |
| 0.833803892 | 0.415757000 | 0.187276155 |
| 0.750800133 | 0.250940472 | 0.283172518 |
| 0.000000000 | 0.500000000 | 0.000000000 |
| 0.166779995 | 0.583260000 | 0.094250001 |
| 0.083865456 | 0.666383505 | 0.188215971 |
| 0.000350684 | 0.500456512 | 0.283948690 |
| 0.250000000 | 0.500000000 | 0.000000000 |
| 0.416880012 | 0.583119988 | 0.094740003 |
| 0.333998382 | 0.665776670 | 0.188226640 |
| 0.248984322 | 0.503971279 | 0.282925695 |

|             |             |             |
|-------------|-------------|-------------|
| 0.500000000 | 0.500000000 | 0.000000000 |
| 0.666239977 | 0.583119988 | 0.094740003 |
| 0.582636952 | 0.664623141 | 0.190260723 |
| 0.750000000 | 0.500000000 | 0.000000000 |
| 0.916480005 | 0.583260000 | 0.094250001 |
| 0.832723618 | 0.666406989 | 0.187692404 |
| 0.757992506 | 0.502254486 | 0.281584978 |
| 0.000000000 | 0.750000000 | 0.000000000 |
| 0.166669995 | 0.833329976 | 0.094530001 |
| 0.083856709 | 0.917378485 | 0.188284904 |
| 0.001653174 | 0.750692070 | 0.283457875 |
| 0.250000000 | 0.750000000 | 0.000000000 |
| 0.416740000 | 0.833220005 | 0.094250001 |
| 0.334281206 | 0.917067349 | 0.188269481 |
| 0.250748456 | 0.750954568 | 0.283364803 |
| 0.500000000 | 0.750000000 | 0.000000000 |
| 0.666390002 | 0.832780004 | 0.094010003 |
| 0.585132539 | 0.917728424 | 0.187603891 |
| 0.499252737 | 0.755076170 | 0.281959355 |
| 0.750000000 | 0.750000000 | 0.000000000 |
| 0.916480005 | 0.833220005 | 0.094250001 |
| 0.833871841 | 0.918067217 | 0.187321588 |
| 0.757841825 | 0.755466163 | 0.281504542 |
| 0.506375134 | 0.502919376 | 0.339758992 |
| 0.175562114 | 0.337571084 | 0.326374769 |

Ce@Ni-H<sub>fcc</sub>

1.0

|               |              |              |
|---------------|--------------|--------------|
| 10.0322999954 | 0.0000000000 | 0.0000000000 |
| -5.0161499977 | 8.6882266544 | 0.0000000000 |



|        | 0.0000000000 | 0.0000000000 | 21.1434993744 |
|--------|--------------|--------------|---------------|
| Ni     | Ce           | H            |               |
| 63     | 1            | 1            |               |
| Direct |              |              |               |
|        | 0.0000000000 | 0.0000000000 | 0.0000000000  |
|        | 0.166779995  | 0.083520003  | 0.094250001   |
|        | 0.082899764  | 0.167159468  | 0.187429994   |
|        | 0.999894381  | 0.000011209  | 0.284096658   |
|        | 0.250000000  | 0.000000000  | 0.000000000   |
|        | 0.416740000  | 0.083520003  | 0.094250001   |
|        | 0.333930582  | 0.167472541  | 0.187782675   |
|        | 0.249784693  | 0.998792470  | 0.283369541   |
|        | 0.500000000  | 0.000000000  | 0.000000000   |
|        | 0.666630030  | 0.083310001  | 0.093910001   |
|        | 0.584472239  | 0.166355118  | 0.187383175   |
|        | 0.501702309  | 0.001425616  | 0.283938259   |
|        | 0.750000000  | 0.000000000  | 0.000000000   |
|        | 0.916689992  | 0.083310001  | 0.093910001   |
|        | 0.833492875  | 0.166404739  | 0.188546851   |
|        | 0.750123978  | 0.998836517  | 0.283159465   |
|        | 0.000000000  | 0.250000000  | 0.000000000   |
|        | 0.167219996  | 0.333609998  | 0.094010003   |
|        | 0.083631434  | 0.415813327  | 0.187816083   |
|        | 0.001119017  | 0.249778658  | 0.283161432   |
|        | 0.250000000  | 0.250000000  | 0.000000000   |
|        | 0.416880012  | 0.333759993  | 0.094740003   |
|        | 0.335654318  | 0.417789966  | 0.190369457   |
|        | 0.246177137  | 0.243228987  | 0.281849116   |
|        | 0.500000000  | 0.250000000  | 0.000000000   |
|        | 0.666390002  | 0.333609998  | 0.094010003   |

|             |             |             |
|-------------|-------------|-------------|
| 0.582325995 | 0.417644739 | 0.190386623 |
| 0.497885555 | 0.242513061 | 0.281546414 |
| 0.750000000 | 0.250000000 | 0.000000000 |
| 0.916689992 | 0.333370000 | 0.093910001 |
| 0.833528757 | 0.415419847 | 0.187372386 |
| 0.749707222 | 0.250071317 | 0.283144802 |
| 0.000000000 | 0.500000000 | 0.000000000 |
| 0.166779995 | 0.583260000 | 0.094250001 |
| 0.083788022 | 0.666227520 | 0.188375726 |
| 0.998537481 | 0.498250663 | 0.283952951 |
| 0.250000000 | 0.500000000 | 0.000000000 |
| 0.416880012 | 0.583119988 | 0.094740003 |
| 0.333973855 | 0.665883839 | 0.187808260 |
| 0.245666832 | 0.500109911 | 0.283264935 |
| 0.500000000 | 0.500000000 | 0.000000000 |
| 0.666239977 | 0.583119988 | 0.094740003 |
| 0.582192540 | 0.664322734 | 0.190344647 |
| 0.750000000 | 0.500000000 | 0.000000000 |
| 0.916480005 | 0.583260000 | 0.094250001 |
| 0.832455039 | 0.665984869 | 0.187785611 |
| 0.757557929 | 0.501989603 | 0.281577349 |
| 0.000000000 | 0.750000000 | 0.000000000 |
| 0.166669995 | 0.833329976 | 0.094530001 |
| 0.083414182 | 0.916589797 | 0.188322574 |
| 0.001232669 | 0.750246108 | 0.283373713 |
| 0.250000000 | 0.750000000 | 0.000000000 |
| 0.416740000 | 0.833220005 | 0.094250001 |
| 0.333686441 | 0.916129351 | 0.188349098 |
| 0.249483347 | 0.750443220 | 0.284458429 |
| 0.500000000 | 0.750000000 | 0.000000000 |

|             |             |             |
|-------------|-------------|-------------|
| 0.666390002 | 0.832780004 | 0.094010003 |
| 0.584180832 | 0.916302562 | 0.187787190 |
| 0.499818265 | 0.754239976 | 0.283239961 |
| 0.750000000 | 0.750000000 | 0.000000000 |
| 0.916480005 | 0.833220005 | 0.094250001 |
| 0.832801402 | 0.917041481 | 0.187424600 |
| 0.756702065 | 0.753699601 | 0.281840235 |
| 0.503038645 | 0.497294813 | 0.339625210 |
| 0.337642133 | 0.662460029 | 0.328330576 |

Ce@Ni-OH<sub>top</sub>

1.0

|               |              |               |
|---------------|--------------|---------------|
| 10.032299954  | 0.000000000  | 0.000000000   |
| -5.0161499977 | 8.6882266544 | 0.000000000   |
| 0.000000000   | 0.000000000  | 21.1434993744 |

| Ni | Ce | O | H |
|----|----|---|---|
|----|----|---|---|

|    |   |   |   |
|----|---|---|---|
| 63 | 1 | 1 | 1 |
|----|---|---|---|

Direct

|             |             |             |
|-------------|-------------|-------------|
| 0.000000000 | 0.000000000 | 0.000000000 |
| 0.166779995 | 0.083520003 | 0.094250001 |
| 0.082859308 | 0.167173341 | 0.187517345 |
| 0.999794602 | 0.000361790 | 0.283973813 |
| 0.250000000 | 0.000000000 | 0.000000000 |
| 0.416740000 | 0.083520003 | 0.094250001 |
| 0.333792835 | 0.167927653 | 0.188073039 |
| 0.250083625 | 0.000492928 | 0.283644527 |
| 0.500000000 | 0.000000000 | 0.000000000 |
| 0.666630030 | 0.083310001 | 0.093910001 |
| 0.584214211 | 0.167145386 | 0.187495172 |
| 0.500482261 | 0.000382603 | 0.283998877 |

|             |             |             |
|-------------|-------------|-------------|
| 0.750000000 | 0.000000000 | 0.000000000 |
| 0.916689992 | 0.083310001 | 0.093910001 |
| 0.833284795 | 0.166745678 | 0.188686863 |
| 0.749290764 | 0.998650789 | 0.283340603 |
| 0.000000000 | 0.250000000 | 0.000000000 |
| 0.167219996 | 0.333609998 | 0.094010003 |
| 0.082885161 | 0.415852576 | 0.187539861 |
| 0.001439154 | 0.250816196 | 0.283350497 |
| 0.250000000 | 0.250000000 | 0.000000000 |
| 0.416880012 | 0.333759993 | 0.094740003 |
| 0.335598737 | 0.417903095 | 0.190288052 |
| 0.247663230 | 0.246084481 | 0.282128334 |
| 0.500000000 | 0.250000000 | 0.000000000 |
| 0.666390002 | 0.333609998 | 0.094010003 |
| 0.581960917 | 0.417869866 | 0.190235838 |
| 0.497993261 | 0.245710716 | 0.281998992 |
| 0.750000000 | 0.250000000 | 0.000000000 |
| 0.916689992 | 0.333370000 | 0.093910001 |
| 0.832879663 | 0.415760726 | 0.187475920 |
| 0.749214828 | 0.250806481 | 0.283353299 |
| 0.000000000 | 0.500000000 | 0.000000000 |
| 0.166779995 | 0.583260000 | 0.094250001 |
| 0.083252832 | 0.666584730 | 0.188349143 |
| 0.999770999 | 0.499618441 | 0.284000903 |
| 0.250000000 | 0.500000000 | 0.000000000 |
| 0.416880012 | 0.583119988 | 0.094740003 |
| 0.333930641 | 0.666169405 | 0.188031077 |
| 0.247761503 | 0.502262235 | 0.282067686 |
| 0.500000000 | 0.500000000 | 0.000000000 |
| 0.666239977 | 0.583119988 | 0.094740003 |

|             |             |             |
|-------------|-------------|-------------|
| 0.582018018 | 0.664193571 | 0.190251604 |
| 0.750000000 | 0.500000000 | 0.000000000 |
| 0.916480005 | 0.583260000 | 0.094250001 |
| 0.832165658 | 0.666151762 | 0.187987119 |
| 0.754217982 | 0.501878142 | 0.281926066 |
| 0.000000000 | 0.750000000 | 0.000000000 |
| 0.166669995 | 0.833329976 | 0.094530001 |
| 0.083259098 | 0.916756034 | 0.188294172 |
| 0.999472857 | 0.749844193 | 0.283566236 |
| 0.250000000 | 0.750000000 | 0.000000000 |
| 0.416740000 | 0.833220005 | 0.094250001 |
| 0.333385974 | 0.916785061 | 0.188348576 |
| 0.249936596 | 0.750146151 | 0.283658743 |
| 0.500000000 | 0.750000000 | 0.000000000 |
| 0.666390002 | 0.832780004 | 0.094010003 |
| 0.584282517 | 0.917201579 | 0.187456787 |
| 0.498007774 | 0.752845705 | 0.281935394 |
| 0.750000000 | 0.750000000 | 0.000000000 |
| 0.916480005 | 0.833220005 | 0.094250001 |
| 0.832889378 | 0.917252302 | 0.187453568 |
| 0.754273236 | 0.752554476 | 0.281887174 |
| 0.502821743 | 0.501980662 | 0.360215187 |
| 0.522086382 | 0.513689101 | 0.461301714 |
| 0.543763459 | 0.526956618 | 0.506205082 |

Ce@Ni-OH<sub>bridge</sub>

1.0

|               |              |               |
|---------------|--------------|---------------|
| 10.0322999954 | 0.000000000  | 0.000000000   |
| -5.0161499977 | 8.6882266544 | 0.000000000   |
| 0.000000000   | 0.000000000  | 21.1434993744 |

| Ni | Ce | O | H |
|----|----|---|---|
| 63 | 1  | 1 | 1 |

Direct

|             |             |             |
|-------------|-------------|-------------|
| 0.000000000 | 0.000000000 | 0.000000000 |
| 0.166779995 | 0.083520003 | 0.094250001 |
| 0.082814604 | 0.167226627 | 0.187084109 |
| 0.998960435 | 0.999212086 | 0.283930182 |
| 0.250000000 | 0.000000000 | 0.000000000 |
| 0.416740000 | 0.083520003 | 0.094250001 |
| 0.334201634 | 0.167718723 | 0.187641814 |
| 0.250049323 | 0.999215364 | 0.283406258 |
| 0.500000000 | 0.000000000 | 0.000000000 |
| 0.666630030 | 0.083310001 | 0.093910001 |
| 0.584710300 | 0.167785078 | 0.187567681 |
| 0.500900507 | 0.001159188 | 0.283756316 |
| 0.750000000 | 0.000000000 | 0.000000000 |
| 0.916689992 | 0.083310001 | 0.093910001 |
| 0.833629131 | 0.167333320 | 0.188200533 |
| 0.749720454 | 0.999428809 | 0.283099711 |
| 0.000000000 | 0.250000000 | 0.000000000 |
| 0.167219996 | 0.333609998 | 0.094010003 |
| 0.086002536 | 0.417291015 | 0.189006805 |
| 0.998230696 | 0.247727245 | 0.282335371 |
| 0.250000000 | 0.250000000 | 0.000000000 |
| 0.416880012 | 0.333759993 | 0.094740003 |
| 0.335982770 | 0.418179125 | 0.191284642 |
| 0.244336426 | 0.239532128 | 0.280809999 |
| 0.500000000 | 0.250000000 | 0.000000000 |
| 0.666390002 | 0.333609998 | 0.094010003 |
| 0.582424521 | 0.417908549 | 0.190323055 |

|             |             |             |
|-------------|-------------|-------------|
| 0.497161031 | 0.245457008 | 0.282037556 |
| 0.750000000 | 0.250000000 | 0.000000000 |
| 0.916689992 | 0.333370000 | 0.093910001 |
| 0.833913684 | 0.415505260 | 0.186947376 |
| 0.749306440 | 0.250708193 | 0.283326834 |
| 0.000000000 | 0.500000000 | 0.000000000 |
| 0.166779995 | 0.583260000 | 0.094250001 |
| 0.083446488 | 0.666231632 | 0.188096777 |
| 0.998646855 | 0.499486029 | 0.283571422 |
| 0.250000000 | 0.500000000 | 0.000000000 |
| 0.416880012 | 0.583119988 | 0.094740003 |
| 0.333072990 | 0.664841592 | 0.188826680 |
| 0.246490881 | 0.501458526 | 0.286416411 |
| 0.500000000 | 0.500000000 | 0.000000000 |
| 0.666239977 | 0.583119988 | 0.094740003 |
| 0.581824243 | 0.663517654 | 0.190142289 |
| 0.750000000 | 0.500000000 | 0.000000000 |
| 0.916480005 | 0.583260000 | 0.094250001 |
| 0.832442582 | 0.666559219 | 0.187749922 |
| 0.758767605 | 0.502336681 | 0.280759513 |
| 0.000000000 | 0.750000000 | 0.000000000 |
| 0.166669995 | 0.833329976 | 0.094530001 |
| 0.083213121 | 0.916668653 | 0.188239142 |
| 0.000445289 | 0.750555217 | 0.283535480 |
| 0.250000000 | 0.750000000 | 0.000000000 |
| 0.416740000 | 0.833220005 | 0.094250001 |
| 0.334106177 | 0.916899562 | 0.188030452 |
| 0.250084728 | 0.752233148 | 0.282686561 |
| 0.500000000 | 0.750000000 | 0.000000000 |
| 0.666390002 | 0.832780004 | 0.094010003 |

|             |             |             |
|-------------|-------------|-------------|
| 0.584354222 | 0.917621017 | 0.186927870 |
| 0.502094686 | 0.757481217 | 0.280581713 |
| 0.750000000 | 0.750000000 | 0.000000000 |
| 0.916480005 | 0.833220005 | 0.094250001 |
| 0.833034515 | 0.917530298 | 0.187287375 |
| 0.755072773 | 0.753235519 | 0.281729102 |
| 0.503949046 | 0.500365555 | 0.347252518 |
| 0.277875304 | 0.490451813 | 0.380927473 |
| 0.177174479 | 0.410352409 | 0.395569801 |

Ce@Ni-OH<sub>hcp</sub>

1.0

|               |              |               |
|---------------|--------------|---------------|
| 10.032299954  | 0.000000000  | 0.000000000   |
| -5.0161499977 | 8.6882266544 | 0.000000000   |
| 0.000000000   | 0.000000000  | 21.1434993744 |

| Ni | Ce | O | H |
|----|----|---|---|
| 63 | 1  | 1 | 1 |

Direct

|             |             |             |
|-------------|-------------|-------------|
| 0.000000000 | 0.000000000 | 0.000000000 |
| 0.166779995 | 0.083520003 | 0.094250001 |
| 0.084127143 | 0.167238355 | 0.188004062 |
| 0.998888969 | 0.999051511 | 0.283740908 |
| 0.250000000 | 0.000000000 | 0.000000000 |
| 0.416740000 | 0.083520003 | 0.094250001 |
| 0.332546055 | 0.168148682 | 0.189152315 |
| 0.249815583 | 0.998796403 | 0.283316493 |
| 0.500000000 | 0.000000000 | 0.000000000 |
| 0.666630030 | 0.083310001 | 0.093910001 |
| 0.583253801 | 0.166482791 | 0.187393159 |
| 0.500000954 | 0.999456108 | 0.283966422 |



|             |             |             |
|-------------|-------------|-------------|
| 0.750000000 | 0.000000000 | 0.000000000 |
| 0.916689992 | 0.083310001 | 0.093910001 |
| 0.831920147 | 0.165824741 | 0.187598214 |
| 0.747498393 | 0.997016430 | 0.283171982 |
| 0.000000000 | 0.250000000 | 0.000000000 |
| 0.167219996 | 0.333609998 | 0.094010003 |
| 0.084038243 | 0.416174918 | 0.188073039 |
| 0.990509748 | 0.244583279 | 0.280413985 |
| 0.250000000 | 0.250000000 | 0.000000000 |
| 0.416880012 | 0.333759993 | 0.094740003 |
| 0.336026430 | 0.417674571 | 0.190574750 |
| 0.246615812 | 0.244452074 | 0.284831196 |
| 0.500000000 | 0.250000000 | 0.000000000 |
| 0.666390002 | 0.333609998 | 0.094010003 |
| 0.582177520 | 0.417678773 | 0.190363154 |
| 0.499449283 | 0.244653359 | 0.281997144 |
| 0.750000000 | 0.250000000 | 0.000000000 |
| 0.916689992 | 0.333370000 | 0.093910001 |
| 0.833135843 | 0.414690524 | 0.186820045 |
| 0.748037338 | 0.249446794 | 0.283167958 |
| 0.000000000 | 0.500000000 | 0.000000000 |
| 0.166779995 | 0.583260000 | 0.094250001 |
| 0.082918197 | 0.665867269 | 0.188151389 |
| 0.999119222 | 0.499019831 | 0.283798486 |
| 0.250000000 | 0.500000000 | 0.000000000 |
| 0.416880012 | 0.583119988 | 0.094740003 |
| 0.332243145 | 0.663378298 | 0.189259216 |
| 0.246738762 | 0.500559866 | 0.285087913 |
| 0.500000000 | 0.500000000 | 0.000000000 |
| 0.666239977 | 0.583119988 | 0.094740003 |

|             |             |             |
|-------------|-------------|-------------|
| 0.582086980 | 0.663818717 | 0.190177605 |
| 0.750000000 | 0.500000000 | 0.000000000 |
| 0.916480005 | 0.583260000 | 0.094250001 |
| 0.832452536 | 0.666124761 | 0.187521100 |
| 0.759487152 | 0.501755297 | 0.280685514 |
| 0.000000000 | 0.750000000 | 0.000000000 |
| 0.166669995 | 0.833329976 | 0.094530001 |
| 0.082998395 | 0.916673303 | 0.188208207 |
| 0.001205369 | 0.750226796 | 0.283646017 |
| 0.250000000 | 0.750000000 | 0.000000000 |
| 0.416740000 | 0.833220005 | 0.094250001 |
| 0.333220840 | 0.916236877 | 0.188184440 |
| 0.249473631 | 0.749705255 | 0.283295363 |
| 0.500000000 | 0.750000000 | 0.000000000 |
| 0.666390002 | 0.832780004 | 0.094010003 |
| 0.583083272 | 0.916005135 | 0.187427387 |
| 0.499004662 | 0.752645731 | 0.281982243 |
| 0.750000000 | 0.750000000 | 0.000000000 |
| 0.916480005 | 0.833220005 | 0.094250001 |
| 0.833146632 | 0.918183208 | 0.186818615 |
| 0.758930266 | 0.756348550 | 0.280634046 |
| 0.522025526 | 0.509800196 | 0.345454097 |
| 0.253655076 | 0.374768227 | 0.364276946 |
| 0.152597368 | 0.322701752 | 0.384286106 |

Ce@Ni-OH<sub>fcc</sub>

1.0

|               |              |               |
|---------------|--------------|---------------|
| 10.0322999954 | 0.0000000000 | 0.0000000000  |
| -5.0161499977 | 8.6882266544 | 0.0000000000  |
| 0.0000000000  | 0.0000000000 | 21.1434993744 |

| Ni | Ce | O | H |
|----|----|---|---|
| 63 | 1  | 1 | 1 |

Direct

|             |             |             |
|-------------|-------------|-------------|
| 0.000000000 | 0.000000000 | 0.000000000 |
| 0.166779995 | 0.083520003 | 0.094250001 |
| 0.082974531 | 0.167385593 | 0.187456623 |
| 0.999616146 | 0.000273160 | 0.284142166 |
| 0.250000000 | 0.000000000 | 0.000000000 |
| 0.416740000 | 0.083520003 | 0.094250001 |
| 0.333535492 | 0.167989299 | 0.187554404 |
| 0.249329492 | 0.000919708 | 0.283510089 |
| 0.500000000 | 0.000000000 | 0.000000000 |
| 0.666630030 | 0.083310001 | 0.093910001 |
| 0.585361063 | 0.166835591 | 0.186982423 |
| 0.500360012 | 0.001869753 | 0.283806294 |
| 0.750000000 | 0.000000000 | 0.000000000 |
| 0.916689992 | 0.083310001 | 0.093910001 |
| 0.833686173 | 0.166271210 | 0.188238159 |
| 0.750718057 | 0.000165219 | 0.283224195 |
| 0.000000000 | 0.250000000 | 0.000000000 |
| 0.167219996 | 0.333609998 | 0.094010003 |
| 0.086487241 | 0.417612523 | 0.189326033 |
| 0.999651611 | 0.249206647 | 0.283206046 |
| 0.250000000 | 0.250000000 | 0.000000000 |
| 0.416880012 | 0.333759993 | 0.094740003 |
| 0.336140424 | 0.418433130 | 0.191333488 |
| 0.246039078 | 0.243416771 | 0.281974405 |
| 0.500000000 | 0.250000000 | 0.000000000 |
| 0.666390002 | 0.333609998 | 0.094010003 |
| 0.582389891 | 0.417736024 | 0.190020621 |

|             |             |             |
|-------------|-------------|-------------|
| 0.496945024 | 0.240889639 | 0.280389965 |
| 0.750000000 | 0.250000000 | 0.000000000 |
| 0.916689992 | 0.333370000 | 0.093910001 |
| 0.833186388 | 0.414613217 | 0.186968535 |
| 0.749498904 | 0.250459701 | 0.283066481 |
| 0.000000000 | 0.500000000 | 0.000000000 |
| 0.166779995 | 0.583260000 | 0.094250001 |
| 0.081806570 | 0.665445387 | 0.187607944 |
| 0.998228490 | 0.499651253 | 0.283808500 |
| 0.250000000 | 0.500000000 | 0.000000000 |
| 0.416880012 | 0.583119988 | 0.094740003 |
| 0.333799720 | 0.666072786 | 0.188197792 |
| 0.243232593 | 0.501441360 | 0.285105705 |
| 0.500000000 | 0.500000000 | 0.000000000 |
| 0.666239977 | 0.583119988 | 0.094740003 |
| 0.581527829 | 0.663844109 | 0.191320360 |
| 0.750000000 | 0.500000000 | 0.000000000 |
| 0.916480005 | 0.583260000 | 0.094250001 |
| 0.832068801 | 0.666492939 | 0.187535837 |
| 0.759343565 | 0.503110170 | 0.280363441 |
| 0.000000000 | 0.750000000 | 0.000000000 |
| 0.166669995 | 0.833329976 | 0.094530001 |
| 0.082937293 | 0.917113483 | 0.188203126 |
| 0.999228954 | 0.750726640 | 0.283519298 |
| 0.250000000 | 0.750000000 | 0.000000000 |
| 0.416740000 | 0.833220005 | 0.094250001 |
| 0.334570616 | 0.918198884 | 0.187591046 |
| 0.244858742 | 0.755434871 | 0.280432701 |
| 0.500000000 | 0.750000000 | 0.000000000 |
| 0.666390002 | 0.832780004 | 0.094010003 |

|             |             |             |
|-------------|-------------|-------------|
| 0.582360268 | 0.913480937 | 0.189357594 |
| 0.498462588 | 0.756590903 | 0.285162926 |
| 0.750000000 | 0.750000000 | 0.000000000 |
| 0.916480005 | 0.833220005 | 0.094250001 |
| 0.832612574 | 0.917055964 | 0.187486082 |
| 0.756576896 | 0.753635168 | 0.281950653 |
| 0.511489630 | 0.488777399 | 0.344589174 |
| 0.376823992 | 0.620852709 | 0.364345461 |
| 0.327405185 | 0.671358407 | 0.385265917 |

Ce@Ni-O<sub>top</sub>

1.0

|               |              |               |
|---------------|--------------|---------------|
| 10.032299954  | 0.000000000  | 0.000000000   |
| -5.0161499977 | 8.6882266544 | 0.000000000   |
| 0.000000000   | 0.000000000  | 21.1434993744 |

|    |    |   |
|----|----|---|
| Ni | Ce | O |
| 63 | 1  | 1 |

Direct

|             |             |             |
|-------------|-------------|-------------|
| 0.000000000 | 0.000000000 | 0.000000000 |
| 0.166779995 | 0.083520003 | 0.094250001 |
| 0.083663568 | 0.167080879 | 0.189813644 |
| 0.000466483 | 0.999495566 | 0.287390649 |
| 0.250000000 | 0.000000000 | 0.000000000 |
| 0.416740000 | 0.083520003 | 0.094250001 |
| 0.334717125 | 0.167670414 | 0.190198749 |
| 0.250257641 | 0.998180628 | 0.287109613 |
| 0.500000000 | 0.000000000 | 0.000000000 |
| 0.666630030 | 0.083310001 | 0.093910001 |
| 0.585377276 | 0.166974127 | 0.189743832 |
| 0.502383053 | 0.001027515 | 0.287276655 |

|             |             |             |
|-------------|-------------|-------------|
| 0.750000000 | 0.000000000 | 0.000000000 |
| 0.916689992 | 0.083310001 | 0.093910001 |
| 0.833947062 | 0.166129082 | 0.190843061 |
| 0.750548303 | 0.998175561 | 0.286442578 |
| 0.000000000 | 0.250000000 | 0.000000000 |
| 0.167219996 | 0.333609998 | 0.094010003 |
| 0.084065616 | 0.415512145 | 0.190109134 |
| 0.001405442 | 0.249027491 | 0.286370754 |
| 0.250000000 | 0.250000000 | 0.000000000 |
| 0.416880012 | 0.333759993 | 0.094740003 |
| 0.335649431 | 0.417525232 | 0.193003654 |
| 0.247388616 | 0.243563756 | 0.285763353 |
| 0.500000000 | 0.250000000 | 0.000000000 |
| 0.666390002 | 0.333609998 | 0.094010003 |
| 0.583101690 | 0.417211026 | 0.192664981 |
| 0.498383135 | 0.243692189 | 0.285451949 |
| 0.750000000 | 0.250000000 | 0.000000000 |
| 0.916689992 | 0.333370000 | 0.093910001 |
| 0.833506584 | 0.415084809 | 0.189719871 |
| 0.750174761 | 0.249830306 | 0.286604106 |
| 0.000000000 | 0.500000000 | 0.000000000 |
| 0.166779995 | 0.583260000 | 0.094250001 |
| 0.084242068 | 0.666140497 | 0.191188321 |
| 0.998861611 | 0.497577459 | 0.287177593 |
| 0.250000000 | 0.500000000 | 0.000000000 |
| 0.416880012 | 0.583119988 | 0.094740003 |
| 0.334401429 | 0.665642798 | 0.190569758 |
| 0.246601313 | 0.500072002 | 0.287142128 |
| 0.500000000 | 0.500000000 | 0.000000000 |
| 0.666239977 | 0.583119988 | 0.094740003 |

|             |             |             |
|-------------|-------------|-------------|
| 0.582722425 | 0.664656043 | 0.193023548 |
| 0.750000000 | 0.500000000 | 0.000000000 |
| 0.916480005 | 0.583260000 | 0.094250001 |
| 0.832686484 | 0.665612221 | 0.190219596 |
| 0.756211877 | 0.501766443 | 0.285444617 |
| 0.000000000 | 0.750000000 | 0.000000000 |
| 0.166669995 | 0.833329976 | 0.094530001 |
| 0.084227934 | 0.916482091 | 0.190689251 |
| 0.001664787 | 0.749927580 | 0.287005514 |
| 0.250000000 | 0.750000000 | 0.000000000 |
| 0.416740000 | 0.833220005 | 0.094250001 |
| 0.334375978 | 0.916134536 | 0.191200033 |
| 0.250308067 | 0.749420702 | 0.288490951 |
| 0.500000000 | 0.750000000 | 0.000000000 |
| 0.666390002 | 0.832780004 | 0.094010003 |
| 0.584739208 | 0.916097105 | 0.190142810 |
| 0.499171942 | 0.753058970 | 0.287173390 |
| 0.750000000 | 0.750000000 | 0.000000000 |
| 0.916480005 | 0.833220005 | 0.094250001 |
| 0.833186090 | 0.916480660 | 0.189850390 |
| 0.756119072 | 0.752515197 | 0.285801381 |
| 0.501972198 | 0.497013688 | 0.353387058 |
| 0.501992464 | 0.496765673 | 0.453208596 |

Ce@Ni-O<sub>bridge</sub>

1.0

|               |              |               |
|---------------|--------------|---------------|
| 10.032299954  | 0.000000000  | 0.000000000   |
| -5.0161499977 | 8.6882266544 | 0.000000000   |
| 0.000000000   | 0.000000000  | 21.1434993744 |

Ni    Ce    O

## Direct

|             |             |             |
|-------------|-------------|-------------|
| 0.000000000 | 0.000000000 | 0.000000000 |
| 0.166779995 | 0.083520003 | 0.094250001 |
| 0.083295666 | 0.167024031 | 0.187413722 |
| 0.999964178 | 0.999683738 | 0.284054160 |
| 0.250000000 | 0.000000000 | 0.000000000 |
| 0.416740000 | 0.083520003 | 0.094250001 |
| 0.333652109 | 0.167361945 | 0.187601864 |
| 0.249765620 | 0.999243200 | 0.283630162 |
| 0.500000000 | 0.000000000 | 0.000000000 |
| 0.666630030 | 0.083310001 | 0.093910001 |
| 0.585241854 | 0.166359290 | 0.186814055 |
| 0.501883507 | 0.001002070 | 0.282928556 |
| 0.750000000 | 0.000000000 | 0.000000000 |
| 0.916689992 | 0.083310001 | 0.093910001 |
| 0.833758652 | 0.166090399 | 0.188212499 |
| 0.751199424 | 0.999549806 | 0.282856315 |
| 0.000000000 | 0.250000000 | 0.000000000 |
| 0.167219996 | 0.333609998 | 0.094010003 |
| 0.086308539 | 0.417014539 | 0.188857988 |
| 0.000393617 | 0.248862222 | 0.282889813 |
| 0.250000000 | 0.250000000 | 0.000000000 |
| 0.416880012 | 0.333759993 | 0.094740003 |
| 0.335817993 | 0.417730659 | 0.190708205 |
| 0.247683600 | 0.241754889 | 0.282025546 |
| 0.500000000 | 0.250000000 | 0.000000000 |
| 0.666390002 | 0.333609998 | 0.094010003 |
| 0.581941366 | 0.417655826 | 0.189966887 |
| 0.497458696 | 0.241110399 | 0.280273855 |



|             |             |             |
|-------------|-------------|-------------|
| 0.750000000 | 0.250000000 | 0.000000000 |
| 0.916689992 | 0.333370000 | 0.093910001 |
| 0.833447635 | 0.414775342 | 0.186838761 |
| 0.749671876 | 0.250128657 | 0.282724947 |
| 0.000000000 | 0.500000000 | 0.000000000 |
| 0.166779995 | 0.583260000 | 0.094250001 |
| 0.083202027 | 0.665774405 | 0.187919229 |
| 0.998665810 | 0.498170435 | 0.282841146 |
| 0.250000000 | 0.500000000 | 0.000000000 |
| 0.416880012 | 0.583119988 | 0.094740003 |
| 0.334177077 | 0.665810645 | 0.188524976 |
| 0.244507551 | 0.497245401 | 0.285938680 |
| 0.500000000 | 0.500000000 | 0.000000000 |
| 0.666239977 | 0.583119988 | 0.094740003 |
| 0.582041085 | 0.664003968 | 0.190663978 |
| 0.750000000 | 0.500000000 | 0.000000000 |
| 0.916480005 | 0.583260000 | 0.094250001 |
| 0.832188010 | 0.666052520 | 0.187577158 |
| 0.758051455 | 0.502008975 | 0.280417502 |
| 0.000000000 | 0.750000000 | 0.000000000 |
| 0.166669995 | 0.833329976 | 0.094530001 |
| 0.083310127 | 0.916322172 | 0.188270584 |
| 0.999848604 | 0.749498904 | 0.283557385 |
| 0.250000000 | 0.750000000 | 0.000000000 |
| 0.416740000 | 0.833220005 | 0.094250001 |
| 0.334283113 | 0.916836441 | 0.187985063 |
| 0.246568710 | 0.753166914 | 0.282072484 |
| 0.500000000 | 0.750000000 | 0.000000000 |
| 0.666390002 | 0.832780004 | 0.094010003 |
| 0.582904875 | 0.913671911 | 0.188872129 |

|             |             |             |
|-------------|-------------|-------------|
| 0.502983928 | 0.755482554 | 0.285935968 |
| 0.750000000 | 0.750000000 | 0.000000000 |
| 0.916480005 | 0.833220005 | 0.094250001 |
| 0.832953453 | 0.916593909 | 0.187482581 |
| 0.757397950 | 0.751566350 | 0.282076687 |
| 0.515162587 | 0.480999947 | 0.355228156 |
| 0.391797483 | 0.608761787 | 0.349788487 |

Ce@Ni-O<sub>hcp</sub>

1.0

|               |              |               |
|---------------|--------------|---------------|
| 10.032299954  | 0.000000000  | 0.000000000   |
| -5.0161499977 | 8.6882266544 | 0.000000000   |
| 0.000000000   | 0.000000000  | 21.1434993744 |

|    |    |   |
|----|----|---|
| Ni | Ce | O |
| 63 | 1  | 1 |

Direct

|             |             |             |
|-------------|-------------|-------------|
| 0.000000000 | 0.000000000 | 0.000000000 |
| 0.166779995 | 0.083520003 | 0.094250001 |
| 0.083419941 | 0.166969076 | 0.188239813 |
| 0.996975899 | 0.996815085 | 0.283028543 |
| 0.250000000 | 0.000000000 | 0.000000000 |
| 0.416740000 | 0.083520003 | 0.094250001 |
| 0.332443088 | 0.167938277 | 0.188840717 |
| 0.248977661 | 0.998653173 | 0.283028573 |
| 0.500000000 | 0.000000000 | 0.000000000 |
| 0.666630030 | 0.083310001 | 0.093910001 |
| 0.582783997 | 0.166565388 | 0.187387988 |
| 0.499584079 | 0.999760032 | 0.283773273 |
| 0.750000000 | 0.000000000 | 0.000000000 |
| 0.916689992 | 0.083310001 | 0.093910001 |

|             |             |             |
|-------------|-------------|-------------|
| 0.832393110 | 0.166112989 | 0.188177854 |
| 0.746861577 | 0.996789932 | 0.283107758 |
| 0.000000000 | 0.250000000 | 0.000000000 |
| 0.167219996 | 0.333609998 | 0.094010003 |
| 0.083442748 | 0.416094661 | 0.188331053 |
| 0.991132736 | 0.245360598 | 0.282198846 |
| 0.250000000 | 0.250000000 | 0.000000000 |
| 0.416880012 | 0.333759993 | 0.094740003 |
| 0.333409607 | 0.416676074 | 0.189858541 |
| 0.244961232 | 0.242884710 | 0.285587996 |
| 0.500000000 | 0.250000000 | 0.000000000 |
| 0.666390002 | 0.333609998 | 0.094010003 |
| 0.580744803 | 0.417588055 | 0.190053314 |
| 0.499372184 | 0.246113971 | 0.282098293 |
| 0.750000000 | 0.250000000 | 0.000000000 |
| 0.916689992 | 0.333370000 | 0.093910001 |
| 0.832427919 | 0.414866745 | 0.186955065 |
| 0.746909857 | 0.249867067 | 0.283118397 |
| 0.000000000 | 0.500000000 | 0.000000000 |
| 0.166779995 | 0.583260000 | 0.094250001 |
| 0.082736425 | 0.665984273 | 0.188051224 |
| 0.997268856 | 0.499752283 | 0.282967508 |
| 0.250000000 | 0.500000000 | 0.000000000 |
| 0.416880012 | 0.583119988 | 0.094740003 |
| 0.332373917 | 0.664310217 | 0.188870803 |
| 0.245723933 | 0.501942396 | 0.285696119 |
| 0.500000000 | 0.500000000 | 0.000000000 |
| 0.666239977 | 0.583119988 | 0.094740003 |
| 0.580835581 | 0.663071632 | 0.190051422 |
| 0.750000000 | 0.500000000 | 0.000000000 |

|             |             |             |
|-------------|-------------|-------------|
| 0.916480005 | 0.583260000 | 0.094250001 |
| 0.831865609 | 0.665912569 | 0.187509269 |
| 0.754712105 | 0.501209736 | 0.280774444 |
| 0.000000000 | 0.750000000 | 0.000000000 |
| 0.166669995 | 0.833329976 | 0.094530001 |
| 0.082781605 | 0.916597188 | 0.188035101 |
| 0.998987079 | 0.749271393 | 0.283567637 |
| 0.250000000 | 0.750000000 | 0.000000000 |
| 0.416740000 | 0.833220005 | 0.094250001 |
| 0.333022296 | 0.916468680 | 0.188130602 |
| 0.248833060 | 0.750072360 | 0.283075303 |
| 0.500000000 | 0.750000000 | 0.000000000 |
| 0.666390002 | 0.832780004 | 0.094010003 |
| 0.582909524 | 0.916146398 | 0.187388152 |
| 0.499209464 | 0.753042221 | 0.282067001 |
| 0.750000000 | 0.750000000 | 0.000000000 |
| 0.916480005 | 0.833220005 | 0.094250001 |
| 0.832426131 | 0.917496443 | 0.186933979 |
| 0.754496872 | 0.753152072 | 0.280822605 |
| 0.523144603 | 0.511097431 | 0.354999065 |
| 0.270591050 | 0.384820759 | 0.350462049 |

Ce@Ni-O<sub>fcc</sub>

1.0

|               |              |               |
|---------------|--------------|---------------|
| 10.0322999954 | 0.0000000000 | 0.0000000000  |
| -5.0161499977 | 8.6882266544 | 0.0000000000  |
| 0.0000000000  | 0.0000000000 | 21.1434993744 |

|    |    |   |
|----|----|---|
| Ni | Ce | O |
| 63 | 1  | 1 |

Direct

|             |             |             |
|-------------|-------------|-------------|
| 0.000000000 | 0.000000000 | 0.000000000 |
| 0.166779995 | 0.083520003 | 0.094250001 |
| 0.082714520 | 0.167531088 | 0.187484130 |
| 0.999271214 | 0.000781816 | 0.283966213 |
| 0.250000000 | 0.000000000 | 0.000000000 |
| 0.416740000 | 0.083520003 | 0.094250001 |
| 0.333105534 | 0.168010473 | 0.187713936 |
| 0.249342546 | 0.001127384 | 0.283490449 |
| 0.500000000 | 0.000000000 | 0.000000000 |
| 0.666630030 | 0.083310001 | 0.093910001 |
| 0.584555268 | 0.167218447 | 0.186900422 |
| 0.501083434 | 0.003235544 | 0.282935262 |
| 0.750000000 | 0.000000000 | 0.000000000 |
| 0.916689992 | 0.083310001 | 0.093910001 |
| 0.833070636 | 0.166974366 | 0.188166946 |
| 0.750213563 | 0.001058105 | 0.282800317 |
| 0.000000000 | 0.250000000 | 0.000000000 |
| 0.167219996 | 0.333609998 | 0.094010003 |
| 0.085328974 | 0.417420626 | 0.188807011 |
| 0.998947799 | 0.249702081 | 0.282809317 |
| 0.250000000 | 0.250000000 | 0.000000000 |
| 0.416880012 | 0.333759993 | 0.094740003 |
| 0.335147142 | 0.418493271 | 0.190777078 |
| 0.246734664 | 0.244227141 | 0.282162964 |
| 0.500000000 | 0.250000000 | 0.000000000 |
| 0.666390002 | 0.333609998 | 0.094010003 |
| 0.581577122 | 0.418496370 | 0.189822212 |
| 0.496447325 | 0.244160429 | 0.280581981 |
| 0.750000000 | 0.250000000 | 0.000000000 |
| 0.916689992 | 0.333370000 | 0.093910001 |

|             |             |             |
|-------------|-------------|-------------|
| 0.832786918 | 0.415445149 | 0.186922312 |
| 0.748171747 | 0.251830876 | 0.283016115 |
| 0.000000000 | 0.500000000 | 0.000000000 |
| 0.166779995 | 0.583260000 | 0.094250001 |
| 0.082866780 | 0.666230679 | 0.188069418 |
| 0.996879816 | 0.498970538 | 0.282982260 |
| 0.250000000 | 0.500000000 | 0.000000000 |
| 0.416880012 | 0.583119988 | 0.094740003 |
| 0.333786249 | 0.666193128 | 0.188460931 |
| 0.242189080 | 0.498493373 | 0.285845160 |
| 0.500000000 | 0.500000000 | 0.000000000 |
| 0.666239977 | 0.583119988 | 0.094740003 |
| 0.581726193 | 0.664947629 | 0.190771505 |
| 0.750000000 | 0.500000000 | 0.000000000 |
| 0.916480005 | 0.583260000 | 0.094250001 |
| 0.832009971 | 0.666963995 | 0.187750190 |
| 0.756017745 | 0.503603578 | 0.280616254 |
| 0.000000000 | 0.750000000 | 0.000000000 |
| 0.166669995 | 0.833329976 | 0.094530001 |
| 0.082874440 | 0.917035162 | 0.188171893 |
| 0.998838186 | 0.750693917 | 0.283508658 |
| 0.250000000 | 0.750000000 | 0.000000000 |
| 0.416740000 | 0.833220005 | 0.094250001 |
| 0.333778560 | 0.917109549 | 0.188037187 |
| 0.245573819 | 0.754372597 | 0.282424599 |
| 0.500000000 | 0.750000000 | 0.000000000 |
| 0.666390002 | 0.832780004 | 0.094010003 |
| 0.582674623 | 0.914697468 | 0.188768625 |
| 0.501456439 | 0.757923424 | 0.285831690 |
| 0.750000000 | 0.750000000 | 0.000000000 |

|             |             |             |
|-------------|-------------|-------------|
| 0.916480005 | 0.833220005 | 0.094250001 |
| 0.832524240 | 0.917345166 | 0.187469527 |
| 0.756072044 | 0.753598571 | 0.282210201 |
| 0.513758659 | 0.486921102 | 0.355390370 |
| 0.387978941 | 0.611906528 | 0.349835753 |

Ce@Ni-OH<sub>top</sub>

1.0

|               |              |               |
|---------------|--------------|---------------|
| 10.0322999954 | 0.0000000000 | 0.0000000000  |
| -5.0161499977 | 8.6882266544 | 0.0000000000  |
| 0.0000000000  | 0.0000000000 | 21.1434993744 |

| Ni | Ce | O | H |
|----|----|---|---|
| 63 | 1  | 1 | 1 |

Direct

|             |             |             |
|-------------|-------------|-------------|
| 0.000000000 | 0.000000000 | 0.000000000 |
| 0.166779995 | 0.083520003 | 0.094250001 |
| 0.082859308 | 0.167173341 | 0.187517345 |
| 0.999794602 | 0.000361790 | 0.283973813 |
| 0.250000000 | 0.000000000 | 0.000000000 |
| 0.416740000 | 0.083520003 | 0.094250001 |
| 0.333792835 | 0.167927653 | 0.188073039 |
| 0.250083625 | 0.000492928 | 0.283644527 |
| 0.500000000 | 0.000000000 | 0.000000000 |
| 0.666630030 | 0.083310001 | 0.093910001 |
| 0.584214211 | 0.167145386 | 0.187495172 |
| 0.500482261 | 0.000382603 | 0.283998877 |
| 0.750000000 | 0.000000000 | 0.000000000 |
| 0.916689992 | 0.083310001 | 0.093910001 |
| 0.833284795 | 0.166745678 | 0.188686863 |
| 0.749290764 | 0.998650789 | 0.283340603 |
| 0.000000000 | 0.250000000 | 0.000000000 |
| 0.167219996 | 0.333609998 | 0.094010003 |
| 0.082885161 | 0.415852576 | 0.187539861 |
| 0.001439154 | 0.250816196 | 0.283350497 |
| 0.250000000 | 0.250000000 | 0.000000000 |
| 0.416880012 | 0.333759993 | 0.094740003 |



|             |             |             |
|-------------|-------------|-------------|
| 0.335598737 | 0.417903095 | 0.190288052 |
| 0.247663230 | 0.246084481 | 0.282128334 |
| 0.500000000 | 0.250000000 | 0.000000000 |
| 0.666390002 | 0.333609998 | 0.094010003 |
| 0.581960917 | 0.417869866 | 0.190235838 |
| 0.497993261 | 0.245710716 | 0.281998992 |
| 0.750000000 | 0.250000000 | 0.000000000 |
| 0.916689992 | 0.333370000 | 0.093910001 |
| 0.832879663 | 0.415760726 | 0.187475920 |
| 0.749214828 | 0.250806481 | 0.283353299 |
| 0.000000000 | 0.500000000 | 0.000000000 |
| 0.166779995 | 0.583260000 | 0.094250001 |
| 0.083252832 | 0.666584730 | 0.188349143 |
| 0.999770999 | 0.499618441 | 0.284000903 |
| 0.250000000 | 0.500000000 | 0.000000000 |
| 0.416880012 | 0.583119988 | 0.094740003 |
| 0.333930641 | 0.666169405 | 0.188031077 |
| 0.247761503 | 0.502262235 | 0.282067686 |
| 0.500000000 | 0.500000000 | 0.000000000 |
| 0.666239977 | 0.583119988 | 0.094740003 |
| 0.582018018 | 0.664193571 | 0.190251604 |
| 0.750000000 | 0.500000000 | 0.000000000 |
| 0.916480005 | 0.583260000 | 0.094250001 |
| 0.832165658 | 0.666151762 | 0.187987119 |
| 0.754217982 | 0.501878142 | 0.281926066 |
| 0.000000000 | 0.750000000 | 0.000000000 |
| 0.166669995 | 0.833329976 | 0.094530001 |
| 0.083259098 | 0.916756034 | 0.188294172 |
| 0.999472857 | 0.749844193 | 0.283566236 |
| 0.250000000 | 0.750000000 | 0.000000000 |

|             |             |             |
|-------------|-------------|-------------|
| 0.416740000 | 0.833220005 | 0.094250001 |
| 0.333385974 | 0.916785061 | 0.188348576 |
| 0.249936596 | 0.750146151 | 0.283658743 |
| 0.500000000 | 0.750000000 | 0.000000000 |
| 0.666390002 | 0.832780004 | 0.094010003 |
| 0.584282517 | 0.917201579 | 0.187456787 |
| 0.498007774 | 0.752845705 | 0.281935394 |
| 0.750000000 | 0.750000000 | 0.000000000 |
| 0.916480005 | 0.833220005 | 0.094250001 |
| 0.832889378 | 0.917252302 | 0.187453568 |
| 0.754273236 | 0.752554476 | 0.281887174 |
| 0.502821743 | 0.501980662 | 0.360215187 |
| 0.522086382 | 0.513689101 | 0.461301714 |
| 0.543763459 | 0.526956618 | 0.506205082 |

Ni-Volmer-IS

1.0

|               |              |               |
|---------------|--------------|---------------|
| 10.0322999954 | 0.0000000000 | 0.0000000000  |
| -5.0161499977 | 8.6882266544 | 0.0000000000  |
| 0.0000000000  | 0.0000000000 | 21.1434993744 |

|    |   |   |
|----|---|---|
| Ni | O | H |
| 64 | 1 | 2 |

Direct

|             |             |             |
|-------------|-------------|-------------|
| 0.000000000 | 0.000000000 | 0.000000000 |
| 0.166966975 | 0.083481900 | 0.094098732 |
| 0.083841257 | 0.167214528 | 0.189160973 |
| 0.000023622 | 0.999908924 | 0.283802539 |
| 0.250000000 | 0.000000000 | 0.000000000 |
| 0.416802704 | 0.083385281 | 0.094117306 |
| 0.333527446 | 0.166508034 | 0.189204141 |

|             |             |             |
|-------------|-------------|-------------|
| 0.249876678 | 0.999269962 | 0.283665657 |
| 0.500000000 | 0.000000000 | 0.000000000 |
| 0.666765332 | 0.083373144 | 0.094243102 |
| 0.583771169 | 0.167167589 | 0.189368039 |
| 0.500377357 | 0.999833703 | 0.283900499 |
| 0.750000000 | 0.000000000 | 0.000000000 |
| 0.916769683 | 0.083359189 | 0.094184540 |
| 0.833691478 | 0.166780636 | 0.189313143 |
| 0.750500977 | 0.000055089 | 0.283665687 |
| 0.000000000 | 0.250000000 | 0.000000000 |
| 0.167537093 | 0.333773255 | 0.094466045 |
| 0.083947890 | 0.416368365 | 0.189246371 |
| 0.000582825 | 0.250114083 | 0.283660889 |
| 0.250000000 | 0.250000000 | 0.000000000 |
| 0.417030334 | 0.333565265 | 0.094442852 |
| 0.335441381 | 0.417564929 | 0.190665513 |
| 0.248533219 | 0.247872189 | 0.282991320 |
| 0.500000000 | 0.250000000 | 0.000000000 |
| 0.666416705 | 0.333663493 | 0.094574347 |
| 0.582812548 | 0.417383999 | 0.190848708 |
| 0.499818116 | 0.247783110 | 0.283286572 |
| 0.750000000 | 0.250000000 | 0.000000000 |
| 0.916728258 | 0.333298117 | 0.094242938 |
| 0.833123267 | 0.416456044 | 0.189367563 |
| 0.750641167 | 0.249795884 | 0.283615798 |
| 0.000000000 | 0.500000000 | 0.000000000 |
| 0.166899711 | 0.583367407 | 0.094132140 |
| 0.083583198 | 0.666665733 | 0.189432070 |
| 0.000335900 | 0.499860018 | 0.283897758 |
| 0.250000000 | 0.500000000 | 0.000000000 |

|             |             |             |
|-------------|-------------|-------------|
| 0.416903883 | 0.583263040 | 0.094420239 |
| 0.333610326 | 0.666777730 | 0.189194202 |
| 0.248734236 | 0.500325680 | 0.283086389 |
| 0.500000000 | 0.500000000 | 0.000000000 |
| 0.666480541 | 0.583062530 | 0.094458424 |
| 0.582729280 | 0.665019810 | 0.190662861 |
| 0.500481367 | 0.499629527 | 0.289492995 |
| 0.750000000 | 0.500000000 | 0.000000000 |
| 0.916703105 | 0.583246827 | 0.094103418 |
| 0.833660901 | 0.666700840 | 0.189187393 |
| 0.752309144 | 0.500447273 | 0.283200622 |
| 0.000000000 | 0.750000000 | 0.000000000 |
| 0.166773513 | 0.833331823 | 0.094435155 |
| 0.083695024 | 0.916597486 | 0.189351439 |
| 0.000774913 | 0.750208676 | 0.283647478 |
| 0.250000000 | 0.750000000 | 0.000000000 |
| 0.416853040 | 0.833340585 | 0.094109066 |
| 0.333492458 | 0.916582584 | 0.189432472 |
| 0.250356734 | 0.749857068 | 0.283715636 |
| 0.500000000 | 0.750000000 | 0.000000000 |
| 0.666352987 | 0.832543552 | 0.094503038 |
| 0.583956540 | 0.916445315 | 0.189264804 |
| 0.500196397 | 0.751586974 | 0.283125371 |
| 0.750000000 | 0.750000000 | 0.000000000 |
| 0.916660309 | 0.833163500 | 0.094100766 |
| 0.833265066 | 0.916599214 | 0.189140797 |
| 0.752237558 | 0.751522541 | 0.282945275 |
| 0.502147973 | 0.498415977 | 0.391016960 |
| 0.550018430 | 0.607171714 | 0.402812928 |
| 0.393738240 | 0.451927841 | 0.403205603 |

Ni-Volmer-TS

1.0

|               |              |               |
|---------------|--------------|---------------|
| 10.0322999954 | 0.0000000000 | 0.0000000000  |
| -5.0161499977 | 8.6882266544 | 0.0000000000  |
| 0.0000000000  | 0.0000000000 | 21.1434993744 |

Ni O H

64 1 2

Direct

|             |             |             |
|-------------|-------------|-------------|
| 0.000000000 | 0.000000000 | 0.000000000 |
| 0.167130545 | 0.084153689 | 0.094077237 |
| 0.083455369 | 0.167776182 | 0.188929647 |
| 0.999743283 | 0.999762535 | 0.283724338 |
| 0.250000000 | 0.000000000 | 0.000000000 |
| 0.417416155 | 0.084038951 | 0.094195299 |
| 0.334980786 | 0.167621523 | 0.188911930 |
| 0.250443012 | 0.998699903 | 0.283580512 |
| 0.500000000 | 0.000000000 | 0.000000000 |
| 0.667213976 | 0.084555738 | 0.094263434 |
| 0.584370196 | 0.169073924 | 0.189756230 |
| 0.501222134 | 0.001836917 | 0.283672899 |
| 0.750000000 | 0.000000000 | 0.000000000 |
| 0.916560709 | 0.084025688 | 0.093932092 |
| 0.834634840 | 0.168772534 | 0.189159945 |
| 0.751571178 | 0.002238280 | 0.283455342 |
| 0.000000000 | 0.250000000 | 0.000000000 |
| 0.166418806 | 0.334119111 | 0.094687060 |
| 0.087536566 | 0.419746757 | 0.191448689 |
| 0.999185383 | 0.249068454 | 0.283294439 |
| 0.250000000 | 0.250000000 | 0.000000000 |

|             |             |             |
|-------------|-------------|-------------|
| 0.417106062 | 0.334284097 | 0.094217427 |
| 0.332552284 | 0.417515218 | 0.189973980 |
| 0.248949423 | 0.241683275 | 0.282447129 |
| 0.500000000 | 0.250000000 | 0.000000000 |
| 0.667361140 | 0.334529519 | 0.094834358 |
| 0.583166718 | 0.418920517 | 0.190340891 |
| 0.499764562 | 0.250517815 | 0.285041034 |
| 0.750000000 | 0.250000000 | 0.000000000 |
| 0.917718649 | 0.334737182 | 0.094371386 |
| 0.835094571 | 0.418588161 | 0.189544901 |
| 0.750550389 | 0.251263529 | 0.283628166 |
| 0.000000000 | 0.500000000 | 0.000000000 |
| 0.167124033 | 0.583826005 | 0.094588339 |
| 0.084719017 | 0.668487906 | 0.189495519 |
| 0.000405669 | 0.501059890 | 0.284099668 |
| 0.250000000 | 0.500000000 | 0.000000000 |
| 0.416676790 | 0.583889127 | 0.094388105 |
| 0.333889544 | 0.666689873 | 0.190421075 |
| 0.251094460 | 0.502692819 | 0.290003836 |
| 0.500000000 | 0.500000000 | 0.000000000 |
| 0.667075515 | 0.583737254 | 0.094187140 |
| 0.584392130 | 0.668098986 | 0.189010665 |
| 0.503513873 | 0.500810087 | 0.284538001 |
| 0.750000000 | 0.500000000 | 0.000000000 |
| 0.917357683 | 0.584048867 | 0.094163015 |
| 0.834352314 | 0.667921364 | 0.189177513 |
| 0.752416909 | 0.501575232 | 0.283595294 |
| 0.000000000 | 0.750000000 | 0.000000000 |
| 0.167332575 | 0.834192336 | 0.094370671 |
| 0.084632680 | 0.918024063 | 0.189353451 |

|             |             |             |
|-------------|-------------|-------------|
| 0.000572681 | 0.750755548 | 0.283711553 |
| 0.250000000 | 0.750000000 | 0.000000000 |
| 0.416774154 | 0.833370566 | 0.094132669 |
| 0.334843427 | 0.917549491 | 0.189238846 |
| 0.250676155 | 0.752147317 | 0.283591151 |
| 0.500000000 | 0.750000000 | 0.000000000 |
| 0.667162776 | 0.834278524 | 0.094022229 |
| 0.584533751 | 0.918369949 | 0.188791052 |
| 0.505325854 | 0.757249355 | 0.282180786 |
| 0.750000000 | 0.750000000 | 0.000000000 |
| 0.917074680 | 0.833992064 | 0.094110489 |
| 0.833981276 | 0.918119431 | 0.189140245 |
| 0.752134323 | 0.751848638 | 0.283143163 |
| 0.349882126 | 0.472524673 | 0.367867857 |
| 0.430969894 | 0.557244897 | 0.392648399 |
| 0.387985766 | 0.369745165 | 0.340794533 |

Ni-Volmer-FS

1.0

|               |              |               |
|---------------|--------------|---------------|
| 10.0322999954 | 0.000000000  | 0.000000000   |
| -5.0161499977 | 8.6882266544 | 0.000000000   |
| 0.000000000   | 0.000000000  | 21.1434993744 |

|    |   |   |
|----|---|---|
| Ni | O | H |
| 64 | 1 | 2 |

Direct

|             |             |             |
|-------------|-------------|-------------|
| 0.000000000 | 0.000000000 | 0.000000000 |
| 0.166323796 | 0.083380356 | 0.094039097 |
| 0.083364472 | 0.167048678 | 0.189408526 |
| 0.998982012 | 0.999337673 | 0.283707619 |
| 0.250000000 | 0.000000000 | 0.000000000 |

|             |             |             |
|-------------|-------------|-------------|
| 0.416846335 | 0.083590508 | 0.094099671 |
| 0.333197922 | 0.166606531 | 0.189051911 |
| 0.248453811 | 0.997822225 | 0.283434898 |
| 0.500000000 | 0.000000000 | 0.000000000 |
| 0.666595995 | 0.083317608 | 0.094046213 |
| 0.582931101 | 0.167246208 | 0.189048469 |
| 0.500109196 | 0.001994407 | 0.283005506 |
| 0.750000000 | 0.000000000 | 0.000000000 |
| 0.916109622 | 0.083306111 | 0.094144367 |
| 0.832810163 | 0.166704431 | 0.188986152 |
| 0.751696348 | 0.002360794 | 0.283386171 |
| 0.000000000 | 0.250000000 | 0.000000000 |
| 0.166211203 | 0.333391249 | 0.094748311 |
| 0.085385948 | 0.417611331 | 0.190714806 |
| 0.997811019 | 0.248316094 | 0.283411801 |
| 0.250000000 | 0.250000000 | 0.000000000 |
| 0.416685462 | 0.333736002 | 0.094516382 |
| 0.332111388 | 0.416828811 | 0.190355599 |
| 0.246195570 | 0.243244857 | 0.284272373 |
| 0.500000000 | 0.250000000 | 0.000000000 |
| 0.666089296 | 0.333316684 | 0.094697155 |
| 0.580695331 | 0.417955220 | 0.191288158 |
| 0.500556529 | 0.246950075 | 0.284627199 |
| 0.750000000 | 0.250000000 | 0.000000000 |
| 0.916354239 | 0.333127201 | 0.094156533 |
| 0.832100689 | 0.416283429 | 0.188963175 |
| 0.749741137 | 0.249942586 | 0.283262730 |
| 0.000000000 | 0.500000000 | 0.000000000 |
| 0.166312397 | 0.582816541 | 0.094207063 |
| 0.082708292 | 0.666328490 | 0.188794255 |



|             |             |             |
|-------------|-------------|-------------|
| 0.996716797 | 0.499476314 | 0.283325791 |
| 0.250000000 | 0.500000000 | 0.000000000 |
| 0.416521966 | 0.583197117 | 0.094380222 |
| 0.333053529 | 0.666128099 | 0.189662561 |
| 0.240020543 | 0.497622132 | 0.287015140 |
| 0.500000000 | 0.500000000 | 0.000000000 |
| 0.665958703 | 0.582750380 | 0.094407886 |
| 0.581321776 | 0.665112555 | 0.190350339 |
| 0.502702355 | 0.496734232 | 0.289585114 |
| 0.750000000 | 0.500000000 | 0.000000000 |
| 0.916137516 | 0.582972467 | 0.094042845 |
| 0.832236588 | 0.665933132 | 0.189005643 |
| 0.752087712 | 0.500514030 | 0.283504546 |
| 0.000000000 | 0.750000000 | 0.000000000 |
| 0.166380689 | 0.833242357 | 0.094080113 |
| 0.082938626 | 0.916538835 | 0.189248562 |
| 0.998959720 | 0.749665380 | 0.283471256 |
| 0.250000000 | 0.750000000 | 0.000000000 |
| 0.416747242 | 0.833211005 | 0.094266772 |
| 0.333115011 | 0.916686535 | 0.188833773 |
| 0.246095076 | 0.752808690 | 0.282362133 |
| 0.500000000 | 0.750000000 | 0.000000000 |
| 0.666091681 | 0.833291471 | 0.094688728 |
| 0.581878364 | 0.913971961 | 0.190472871 |
| 0.504243135 | 0.759763956 | 0.286345750 |
| 0.750000000 | 0.750000000 | 0.000000000 |
| 0.916336775 | 0.833136916 | 0.094108529 |
| 0.832283556 | 0.916248262 | 0.189201877 |
| 0.754331589 | 0.751602471 | 0.282683223 |
| 0.413448364 | 0.591047168 | 0.346618503 |

|             |             |             |
|-------------|-------------|-------------|
| 0.412228644 | 0.593760431 | 0.392639846 |
| 0.413467050 | 0.319681406 | 0.327599108 |

Ni-Heyrovsky-IS

1.0

|               |              |               |
|---------------|--------------|---------------|
| 10.0322999954 | 0.0000000000 | 0.0000000000  |
| -5.0161499977 | 8.6882266544 | 0.0000000000  |
| 0.0000000000  | 0.0000000000 | 21.1434993744 |

|    |   |   |
|----|---|---|
| Ni | O | H |
| 64 | 1 | 3 |

Direct

|             |             |             |
|-------------|-------------|-------------|
| 0.000000000 | 0.000000000 | 0.000000000 |
| 0.167282552 | 0.083709866 | 0.094094053 |
| 0.084069416 | 0.167464554 | 0.189026937 |
| 0.000977559 | 0.000909326 | 0.283453226 |
| 0.250000000 | 0.000000000 | 0.000000000 |
| 0.417271614 | 0.083835475 | 0.094018333 |
| 0.334380746 | 0.167270973 | 0.189132214 |
| 0.250817776 | 0.000125080 | 0.283450127 |
| 0.500000000 | 0.000000000 | 0.000000000 |
| 0.667066813 | 0.083611213 | 0.094193153 |
| 0.584483981 | 0.167957574 | 0.189367399 |
| 0.500943542 | 0.000356358 | 0.283783048 |
| 0.750000000 | 0.000000000 | 0.000000000 |
| 0.917065144 | 0.083705492 | 0.094032034 |
| 0.833988309 | 0.166997552 | 0.189197049 |
| 0.750949025 | 0.000677193 | 0.283416659 |
| 0.000000000 | 0.250000000 | 0.000000000 |
| 0.167830870 | 0.333890200 | 0.094469346 |
| 0.084052168 | 0.416758060 | 0.188936666 |

|             |             |             |
|-------------|-------------|-------------|
| 0.000952098 | 0.250573426 | 0.283482075 |
| 0.250000000 | 0.250000000 | 0.000000000 |
| 0.417462379 | 0.334016472 | 0.094563685 |
| 0.335835755 | 0.417988837 | 0.190674961 |
| 0.248888135 | 0.248097897 | 0.282718956 |
| 0.500000000 | 0.250000000 | 0.000000000 |
| 0.666753232 | 0.334192961 | 0.094767742 |
| 0.583001494 | 0.418033779 | 0.191469103 |
| 0.499650449 | 0.247330710 | 0.283507317 |
| 0.750000000 | 0.250000000 | 0.000000000 |
| 0.916986048 | 0.333395928 | 0.094039574 |
| 0.833717525 | 0.417277724 | 0.189330384 |
| 0.751083672 | 0.250324368 | 0.283373863 |
| 0.000000000 | 0.500000000 | 0.000000000 |
| 0.167239591 | 0.583649397 | 0.094057590 |
| 0.084383510 | 0.667414367 | 0.189277261 |
| 0.001180182 | 0.500132501 | 0.283479780 |
| 0.250000000 | 0.500000000 | 0.000000000 |
| 0.417420328 | 0.583460271 | 0.094521776 |
| 0.334410667 | 0.667434752 | 0.189010113 |
| 0.248871058 | 0.501029909 | 0.282524407 |
| 0.500000000 | 0.500000000 | 0.000000000 |
| 0.666717291 | 0.583352864 | 0.094809137 |
| 0.582967520 | 0.665302753 | 0.191221729 |
| 0.498095483 | 0.498952031 | 0.292840958 |
| 0.750000000 | 0.500000000 | 0.000000000 |
| 0.916920722 | 0.583454728 | 0.094105817 |
| 0.834532619 | 0.667298913 | 0.189254925 |
| 0.753697813 | 0.500258803 | 0.284549832 |
| 0.000000000 | 0.750000000 | 0.000000000 |

|             |             |             |
|-------------|-------------|-------------|
| 0.167251840 | 0.833671153 | 0.094296984 |
| 0.084376909 | 0.917221546 | 0.189244524 |
| 0.003639733 | 0.751812935 | 0.283520132 |
| 0.250000000 | 0.750000000 | 0.000000000 |
| 0.417284131 | 0.833550751 | 0.094005905 |
| 0.334699839 | 0.917415261 | 0.189197615 |
| 0.250955194 | 0.750626802 | 0.283514410 |
| 0.500000000 | 0.750000000 | 0.000000000 |
| 0.666860163 | 0.832705736 | 0.094721757 |
| 0.584626138 | 0.916867197 | 0.189231038 |
| 0.499723792 | 0.752396524 | 0.283264399 |
| 0.750000000 | 0.750000000 | 0.000000000 |
| 0.916929841 | 0.833509743 | 0.094126694 |
| 0.833587468 | 0.916434646 | 0.189349860 |
| 0.753240585 | 0.753169894 | 0.284597993 |
| 0.447859198 | 0.477027059 | 0.396943361 |
| 0.506471634 | 0.581736624 | 0.413688809 |
| 0.339493811 | 0.449421078 | 0.399777293 |
| 0.684740782 | 0.592398226 | 0.326682389 |

Ni-Heyrovsky-TS

1.0

|               |              |               |
|---------------|--------------|---------------|
| 10.0322999954 | 0.0000000000 | 0.0000000000  |
| -5.0161499977 | 8.6882266544 | 0.0000000000  |
| 0.0000000000  | 0.0000000000 | 21.1434993744 |

|    |   |   |
|----|---|---|
| Ni | O | H |
| 64 | 1 | 3 |

Direct

|             |             |             |
|-------------|-------------|-------------|
| 0.000000000 | 0.000000000 | 0.000000000 |
| 0.166386858 | 0.082607038 | 0.094035365 |

|             |             |             |
|-------------|-------------|-------------|
| 0.082574107 | 0.165042639 | 0.189195395 |
| 0.001538360 | 0.001109906 | 0.283720165 |
| 0.250000000 | 0.000000000 | 0.000000000 |
| 0.416416824 | 0.082881019 | 0.094061956 |
| 0.332714468 | 0.165752500 | 0.189135000 |
| 0.249960899 | 0.998850405 | 0.283438921 |
| 0.500000000 | 0.000000000 | 0.000000000 |
| 0.666392684 | 0.082904436 | 0.094289705 |
| 0.582874477 | 0.166405454 | 0.189362586 |
| 0.499301940 | 0.999201655 | 0.283687264 |
| 0.750000000 | 0.000000000 | 0.000000000 |
| 0.916417122 | 0.082624957 | 0.094070986 |
| 0.832908332 | 0.165077418 | 0.189077839 |
| 0.749511719 | 0.001176364 | 0.283308119 |
| 0.000000000 | 0.250000000 | 0.000000000 |
| 0.166472897 | 0.332350433 | 0.094442032 |
| 0.083376326 | 0.415140122 | 0.189161420 |
| 0.999316812 | 0.249161258 | 0.283396989 |
| 0.250000000 | 0.250000000 | 0.000000000 |
| 0.416389704 | 0.333085030 | 0.094409041 |
| 0.335293502 | 0.417191774 | 0.190506890 |
| 0.247890264 | 0.247651815 | 0.283109993 |
| 0.500000000 | 0.250000000 | 0.000000000 |
| 0.665861249 | 0.332944334 | 0.094324097 |
| 0.581704974 | 0.416765094 | 0.190341592 |
| 0.498974532 | 0.246626958 | 0.283432484 |
| 0.750000000 | 0.250000000 | 0.000000000 |
| 0.916356444 | 0.332906425 | 0.094392888 |
| 0.831867576 | 0.415864617 | 0.189209029 |
| 0.750039458 | 0.248439386 | 0.283368707 |

|             |             |             |
|-------------|-------------|-------------|
| 0.000000000 | 0.500000000 | 0.000000000 |
| 0.166469604 | 0.582680464 | 0.094234385 |
| 0.081998728 | 0.665003598 | 0.189305142 |
| 0.000042403 | 0.498639554 | 0.283603668 |
| 0.250000000 | 0.500000000 | 0.000000000 |
| 0.416644365 | 0.582559407 | 0.094510883 |
| 0.333333910 | 0.665703118 | 0.189052224 |
| 0.247731417 | 0.499072880 | 0.283009320 |
| 0.500000000 | 0.500000000 | 0.000000000 |
| 0.666300416 | 0.582909226 | 0.094759464 |
| 0.583732963 | 0.665096998 | 0.191716149 |
| 0.496826112 | 0.496669412 | 0.289733648 |
| 0.750000000 | 0.500000000 | 0.000000000 |
| 0.916032135 | 0.582839847 | 0.094021522 |
| 0.831940293 | 0.666526377 | 0.190452516 |
| 0.751748979 | 0.496199578 | 0.282726467 |
| 0.000000000 | 0.750000000 | 0.000000000 |
| 0.166153252 | 0.832356811 | 0.094342366 |
| 0.082670406 | 0.915171146 | 0.189305663 |
| 0.002736214 | 0.749640167 | 0.283415288 |
| 0.250000000 | 0.750000000 | 0.000000000 |
| 0.416496515 | 0.832753718 | 0.094039686 |
| 0.332468688 | 0.915267766 | 0.189234868 |
| 0.249353573 | 0.749145269 | 0.283431798 |
| 0.500000000 | 0.750000000 | 0.000000000 |
| 0.666297436 | 0.832231700 | 0.094803140 |
| 0.582979679 | 0.915036559 | 0.189288318 |
| 0.497398198 | 0.750746191 | 0.283004642 |
| 0.750000000 | 0.750000000 | 0.000000000 |
| 0.916066170 | 0.832604468 | 0.094489582 |

|             |             |             |
|-------------|-------------|-------------|
| 0.831409633 | 0.913609028 | 0.190331846 |
| 0.754468501 | 0.753277779 | 0.289581120 |
| 0.543458700 | 0.513461113 | 0.376337111 |
| 0.461301267 | 0.512764037 | 0.401467234 |
| 0.699328899 | 0.688785732 | 0.366077125 |
| 0.785106540 | 0.779153347 | 0.365105599 |

Ni-Heyrovsky-FS

1.0

|               |              |               |
|---------------|--------------|---------------|
| 10.0322999954 | 0.0000000000 | 0.0000000000  |
| -5.0161499977 | 8.6882266544 | 0.0000000000  |
| 0.0000000000  | 0.0000000000 | 21.1434993744 |

|    |   |   |
|----|---|---|
| Ni | O | H |
| 64 | 1 | 3 |

Direct

|             |             |             |
|-------------|-------------|-------------|
| 0.000000000 | 0.000000000 | 0.000000000 |
| 0.166706324 | 0.083615422 | 0.094347112 |
| 0.086325802 | 0.168115109 | 0.190864444 |
| 0.998302698 | 0.998474002 | 0.283545494 |
| 0.250000000 | 0.000000000 | 0.000000000 |
| 0.417154789 | 0.083598368 | 0.094334655 |
| 0.333951205 | 0.167146280 | 0.190010786 |
| 0.247260988 | 0.994352400 | 0.282780647 |
| 0.500000000 | 0.000000000 | 0.000000000 |
| 0.666780531 | 0.083376095 | 0.094202526 |
| 0.582406819 | 0.168437764 | 0.190833345 |
| 0.500468075 | 0.998556495 | 0.283510298 |
| 0.750000000 | 0.000000000 | 0.000000000 |
| 0.916701615 | 0.083405972 | 0.094211482 |
| 0.833417356 | 0.166648522 | 0.188991070 |

|             |             |             |
|-------------|-------------|-------------|
| 0.750506878 | 0.000601226 | 0.283398032 |
| 0.000000000 | 0.250000000 | 0.000000000 |
| 0.166638494 | 0.332876235 | 0.094728693 |
| 0.083654732 | 0.416408956 | 0.189224601 |
| 0.998335600 | 0.249940589 | 0.283474624 |
| 0.250000000 | 0.250000000 | 0.000000000 |
| 0.416704446 | 0.333221883 | 0.094345063 |
| 0.333813578 | 0.416190237 | 0.190010414 |
| 0.242057830 | 0.246090874 | 0.287037760 |
| 0.500000000 | 0.250000000 | 0.000000000 |
| 0.666580915 | 0.333050996 | 0.094756201 |
| 0.583172143 | 0.416364670 | 0.190056607 |
| 0.504365623 | 0.246369019 | 0.287051797 |
| 0.750000000 | 0.250000000 | 0.000000000 |
| 0.916710496 | 0.333132118 | 0.094167411 |
| 0.833511770 | 0.416685104 | 0.189150557 |
| 0.751945853 | 0.250023246 | 0.283444524 |
| 0.000000000 | 0.500000000 | 0.000000000 |
| 0.166895106 | 0.583436012 | 0.094133161 |
| 0.083846949 | 0.667222321 | 0.189443663 |
| 0.000142162 | 0.500104427 | 0.283892304 |
| 0.250000000 | 0.500000000 | 0.000000000 |
| 0.417057008 | 0.583404243 | 0.094322078 |
| 0.333881795 | 0.666861892 | 0.189097822 |
| 0.248238772 | 0.503712654 | 0.282763928 |
| 0.500000000 | 0.500000000 | 0.000000000 |
| 0.666667163 | 0.583525717 | 0.094328709 |
| 0.582055092 | 0.663880110 | 0.190718144 |
| 0.504498422 | 0.508676112 | 0.286963552 |
| 0.750000000 | 0.500000000 | 0.000000000 |



|             |             |             |
|-------------|-------------|-------------|
| 0.916772783 | 0.583324075 | 0.094086766 |
| 0.833483696 | 0.666934967 | 0.189040944 |
| 0.756047010 | 0.503830969 | 0.282786995 |
| 0.000000000 | 0.750000000 | 0.000000000 |
| 0.166810662 | 0.833383024 | 0.094226994 |
| 0.083452478 | 0.916729808 | 0.189094529 |
| 0.000452176 | 0.750264287 | 0.283691615 |
| 0.250000000 | 0.750000000 | 0.000000000 |
| 0.417031795 | 0.833382845 | 0.094134957 |
| 0.333841354 | 0.916979373 | 0.189103678 |
| 0.250401318 | 0.750229537 | 0.283646703 |
| 0.500000000 | 0.750000000 | 0.000000000 |
| 0.666783214 | 0.833298147 | 0.094429292 |
| 0.583922803 | 0.916665614 | 0.189055905 |
| 0.500766575 | 0.752121329 | 0.283446521 |
| 0.750000000 | 0.750000000 | 0.000000000 |
| 0.916646361 | 0.833420634 | 0.094105072 |
| 0.833218634 | 0.916640103 | 0.189028859 |
| 0.751805365 | 0.752157211 | 0.283352405 |
| 0.417273045 | 0.334038943 | 0.346226364 |
| 0.419482529 | 0.336098462 | 0.392272562 |
| 0.715414762 | 0.613074064 | 0.427367866 |
| 0.709578693 | 0.602609038 | 0.462758392 |

Ce@Ni-Volmer-IS

1.0

|               |              |               |
|---------------|--------------|---------------|
| 10.0322999954 | 0.0000000000 | 0.0000000000  |
| -5.0161499977 | 8.6882266544 | 0.0000000000  |
| 0.0000000000  | 0.0000000000 | 21.1434993744 |

Ni Ce O H

63 1 1 2

Direct

|             |             |             |
|-------------|-------------|-------------|
| 0.000000000 | 0.000000000 | 0.000000000 |
| 0.166599289 | 0.083703019 | 0.094159380 |
| 0.082405850 | 0.167534903 | 0.188683122 |
| 0.998781204 | 0.999946237 | 0.284279644 |
| 0.250000000 | 0.000000000 | 0.000000000 |
| 0.416710079 | 0.083600268 | 0.094179541 |
| 0.333906651 | 0.168289080 | 0.189061403 |
| 0.248939589 | 0.998792887 | 0.283699661 |
| 0.500000000 | 0.000000000 | 0.000000000 |
| 0.666513920 | 0.083485208 | 0.093897477 |
| 0.584111750 | 0.167717174 | 0.188871995 |
| 0.500181079 | 0.000439105 | 0.284230232 |
| 0.750000000 | 0.000000000 | 0.000000000 |
| 0.916427672 | 0.083485238 | 0.093899384 |
| 0.832939744 | 0.166883379 | 0.189288884 |
| 0.749221325 | 0.999782979 | 0.283517331 |
| 0.000000000 | 0.250000000 | 0.000000000 |
| 0.167406231 | 0.334055394 | 0.093969546 |
| 0.082190543 | 0.415841490 | 0.188545346 |
| 0.999174953 | 0.250048637 | 0.283582419 |
| 0.250000000 | 0.250000000 | 0.000000000 |
| 0.416875660 | 0.333812952 | 0.094602488 |
| 0.334275872 | 0.417311132 | 0.190720305 |
| 0.245080158 | 0.244300172 | 0.282959640 |
| 0.500000000 | 0.250000000 | 0.000000000 |
| 0.666264236 | 0.333896577 | 0.093999334 |
| 0.582441986 | 0.417660952 | 0.190759987 |
| 0.497969121 | 0.246048003 | 0.283439457 |

|             |             |             |
|-------------|-------------|-------------|
| 0.750000060 | 0.250000000 | 0.000000000 |
| 0.916469812 | 0.333465278 | 0.093810126 |
| 0.832476139 | 0.416191936 | 0.188790724 |
| 0.749210179 | 0.250230968 | 0.283466339 |
| 0.000000000 | 0.500000000 | 0.000000000 |
| 0.166794047 | 0.583562732 | 0.094178975 |
| 0.083269835 | 0.667043447 | 0.189474702 |
| 0.999045074 | 0.499485970 | 0.284317464 |
| 0.250000000 | 0.500000000 | 0.000000000 |
| 0.417048573 | 0.583349347 | 0.094677046 |
| 0.334080279 | 0.666279972 | 0.189004317 |
| 0.244697809 | 0.501175642 | 0.282730550 |
| 0.500000000 | 0.500000000 | 0.000000000 |
| 0.666244149 | 0.583400488 | 0.094665974 |
| 0.582422316 | 0.665568590 | 0.190918177 |
| 0.750000060 | 0.500000000 | 0.000000000 |
| 0.916587532 | 0.583519459 | 0.094187781 |
| 0.831619799 | 0.666215956 | 0.189185500 |
| 0.753809333 | 0.501467407 | 0.283365577 |
| 0.000000000 | 0.750000000 | 0.000000000 |
| 0.166762084 | 0.833728671 | 0.094642043 |
| 0.082973585 | 0.917295694 | 0.189538360 |
| 0.000087099 | 0.750431418 | 0.283749729 |
| 0.249999985 | 0.750000000 | 0.000000000 |
| 0.416806549 | 0.833546102 | 0.094150975 |
| 0.333617389 | 0.917143345 | 0.189515799 |
| 0.248772219 | 0.750753105 | 0.283761173 |
| 0.500000000 | 0.750000000 | 0.000000000 |
| 0.666251302 | 0.832948804 | 0.094103090 |
| 0.584061444 | 0.917208731 | 0.188915104 |

|             |             |             |
|-------------|-------------|-------------|
| 0.497490466 | 0.752396345 | 0.283517599 |
| 0.750000000 | 0.750000000 | 0.000000000 |
| 0.916522980 | 0.833462059 | 0.094203673 |
| 0.832296669 | 0.917059422 | 0.188952193 |
| 0.753435493 | 0.752789080 | 0.283527672 |
| 0.495289743 | 0.498559415 | 0.324522346 |
| 0.337732077 | 0.444848686 | 0.429842532 |
| 0.245344520 | 0.439048558 | 0.410721302 |
| 0.299901098 | 0.350742936 | 0.454653025 |

Ce@Ni-Volmer-TS

1.0

|               |              |               |
|---------------|--------------|---------------|
| 10.032299954  | 0.000000000  | 0.000000000   |
| -5.0161499977 | 8.6882266544 | 0.000000000   |
| 0.000000000   | 0.000000000  | 21.1434993744 |

| Ni | Ce | O | H |
|----|----|---|---|
| 63 | 1  | 1 | 2 |

Direct

|             |             |             |
|-------------|-------------|-------------|
| 0.000000000 | 0.000000000 | 0.000000000 |
| 0.166624382 | 0.082573012 | 0.094115801 |
| 0.082745202 | 0.165411189 | 0.188800320 |
| 0.999381661 | 0.998455763 | 0.284209728 |
| 0.250000000 | 0.000000000 | 0.000000000 |
| 0.416507304 | 0.082402214 | 0.094058283 |
| 0.333554149 | 0.166582048 | 0.189230427 |
| 0.249294996 | 0.997743309 | 0.283541411 |
| 0.500000000 | 0.000000000 | 0.000000000 |
| 0.666706979 | 0.082483165 | 0.093986943 |
| 0.583457053 | 0.165282726 | 0.188865334 |
| 0.500006676 | 0.999074101 | 0.284285009 |

|             |             |             |
|-------------|-------------|-------------|
| 0.750000000 | 0.000000000 | 0.000000000 |
| 0.916585445 | 0.082789376 | 0.093891352 |
| 0.833268583 | 0.165204331 | 0.189644173 |
| 0.748740911 | 0.997414708 | 0.283603340 |
| 0.000000000 | 0.250000000 | 0.000000000 |
| 0.167687699 | 0.332989961 | 0.094359301 |
| 0.083145522 | 0.413998306 | 0.189173058 |
| 0.998569965 | 0.247527927 | 0.284148932 |
| 0.250000000 | 0.250000000 | 0.000000000 |
| 0.416915148 | 0.332961202 | 0.094882332 |
| 0.335919142 | 0.416246653 | 0.191715866 |
| 0.243600145 | 0.243260950 | 0.283861369 |
| 0.500000000 | 0.250000000 | 0.000000000 |
| 0.666248620 | 0.332503825 | 0.093941770 |
| 0.583538771 | 0.416029066 | 0.190971747 |
| 0.497752249 | 0.245188847 | 0.282941818 |
| 0.750000060 | 0.250000000 | 0.000000000 |
| 0.916941226 | 0.332408071 | 0.093853153 |
| 0.832720339 | 0.413386852 | 0.188560233 |
| 0.749261081 | 0.248313308 | 0.283478528 |
| 0.000000000 | 0.500000000 | 0.000000000 |
| 0.166720048 | 0.582403660 | 0.094212122 |
| 0.082517721 | 0.663895607 | 0.189613834 |
| 0.000238740 | 0.497785628 | 0.284295410 |
| 0.250000000 | 0.500000000 | 0.000000000 |
| 0.416782498 | 0.582140505 | 0.094915494 |
| 0.333206058 | 0.663320422 | 0.189673111 |
| 0.245747060 | 0.496036440 | 0.284678757 |
| 0.500000000 | 0.500000000 | 0.000000000 |
| 0.666062891 | 0.582220018 | 0.094691403 |

|             |             |             |
|-------------|-------------|-------------|
| 0.582845271 | 0.664039314 | 0.191090956 |
| 0.750000060 | 0.500000000 | 0.000000000 |
| 0.916445017 | 0.582500815 | 0.094062336 |
| 0.832061768 | 0.664695561 | 0.189041555 |
| 0.757235110 | 0.499604404 | 0.283111989 |
| 0.000000000 | 0.750000000 | 0.000000000 |
| 0.166298300 | 0.832216442 | 0.094654180 |
| 0.082841277 | 0.915020466 | 0.189523727 |
| 0.001850755 | 0.749398291 | 0.283788532 |
| 0.249999985 | 0.750000000 | 0.000000000 |
| 0.416421860 | 0.832360744 | 0.094216168 |
| 0.332874984 | 0.914602697 | 0.189606428 |
| 0.249424741 | 0.748040497 | 0.283687115 |
| 0.500000000 | 0.750000000 | 0.000000000 |
| 0.666016221 | 0.831701577 | 0.093958259 |
| 0.583559692 | 0.914954603 | 0.189033836 |
| 0.497267276 | 0.750362635 | 0.283326507 |
| 0.750000000 | 0.750000000 | 0.000000000 |
| 0.916416109 | 0.832653880 | 0.094097070 |
| 0.832340062 | 0.915916443 | 0.188663065 |
| 0.756351531 | 0.752900481 | 0.283139855 |
| 0.513919652 | 0.506044030 | 0.330172718 |
| 0.327776432 | 0.384695768 | 0.406364352 |
| 0.243898004 | 0.355668008 | 0.350883275 |
| 0.280985802 | 0.282769024 | 0.425710559 |

Ce@Ni-Volmer-FS

1.0

|               |              |             |
|---------------|--------------|-------------|
| 10.0322999954 | 0.000000000  | 0.000000000 |
| -5.0161499977 | 8.6882266544 | 0.000000000 |

|        | 0.0000000000 | 0.0000000000 | 21.1434993744 |
|--------|--------------|--------------|---------------|
| Ni     | Ce           | O            | H             |
| 63     | 1            | 1            | 2             |
| Direct |              |              |               |
|        | 0.0000000000 | 0.0000000000 | 0.0000000000  |
|        | 0.166613296  | 0.084109135  | 0.094189078   |
|        | 0.086515978  | 0.168856278  | 0.190829262   |
|        | 0.996832728  | 0.996303618  | 0.283622652   |
|        | 0.250000000  | 0.000000000  | 0.000000000   |
|        | 0.416870892  | 0.083880864  | 0.094247408   |
|        | 0.333101183  | 0.168229461  | 0.190117419   |
|        | 0.244841948  | 0.991485476  | 0.281566173   |
|        | 0.500000000  | 0.000000000  | 0.000000000   |
|        | 0.666523695  | 0.084621802  | 0.094014972   |
|        | 0.580880582  | 0.168413877  | 0.190747172   |
|        | 0.499275863  | 0.997255445  | 0.283635885   |
|        | 0.750000000  | 0.000000000  | 0.000000000   |
|        | 0.917627037  | 0.084906645  | 0.094261140   |
|        | 0.833130181  | 0.167684570  | 0.189014465   |
|        | 0.748764873  | 0.999298215  | 0.283113092   |
|        | 0.000000000  | 0.250000000  | 0.000000000   |
|        | 0.167638078  | 0.333748996  | 0.094728604   |
|        | 0.082180604  | 0.415799499  | 0.188633725   |
|        | 0.995807946  | 0.248132333  | 0.284393400   |
|        | 0.250000000  | 0.250000000  | 0.000000000   |
|        | 0.416858017  | 0.333960772  | 0.095284075   |
|        | 0.335532486  | 0.418160975  | 0.192154408   |
|        | 0.242540151  | 0.242134675  | 0.288337916   |
|        | 0.500000000  | 0.250000000  | 0.000000000   |
|        | 0.665683568  | 0.333697319  | 0.094692506   |

|             |             |             |
|-------------|-------------|-------------|
| 0.581264913 | 0.417916000 | 0.192229807 |
| 0.499650657 | 0.241848171 | 0.286370277 |
| 0.750000060 | 0.250000000 | 0.000000000 |
| 0.916349351 | 0.333349526 | 0.093755886 |
| 0.831867754 | 0.415471047 | 0.188693568 |
| 0.750057697 | 0.249151811 | 0.283331335 |
| 0.000000000 | 0.500000000 | 0.000000000 |
| 0.166467100 | 0.583355725 | 0.093969159 |
| 0.082414441 | 0.665982246 | 0.189201891 |
| 0.997447312 | 0.500001669 | 0.283886820 |
| 0.250000000 | 0.500000000 | 0.000000000 |
| 0.416464180 | 0.582928300 | 0.094588220 |
| 0.332394093 | 0.664534569 | 0.188909531 |
| 0.244629398 | 0.501603842 | 0.284782320 |
| 0.500000000 | 0.500000000 | 0.000000000 |
| 0.665637136 | 0.582692921 | 0.094538495 |
| 0.582819343 | 0.666727483 | 0.189850107 |
| 0.750000060 | 0.500000000 | 0.000000000 |
| 0.916198492 | 0.583183348 | 0.093994029 |
| 0.831243396 | 0.665496826 | 0.188696265 |
| 0.754507661 | 0.501716018 | 0.283055216 |
| 0.000000000 | 0.750000000 | 0.000000000 |
| 0.166345328 | 0.833359778 | 0.094267435 |
| 0.081595816 | 0.916523576 | 0.188541189 |
| 0.999899030 | 0.749148846 | 0.283658743 |
| 0.249999985 | 0.750000000 | 0.000000000 |
| 0.416806847 | 0.833318949 | 0.093926527 |
| 0.333186418 | 0.915989518 | 0.188647717 |
| 0.247740448 | 0.749297678 | 0.283503920 |
| 0.500000000 | 0.750000000 | 0.000000000 |



|             |             |             |
|-------------|-------------|-------------|
| 0.666501522 | 0.834173679 | 0.093523547 |
| 0.583983779 | 0.917881370 | 0.188148424 |
| 0.495946378 | 0.752996504 | 0.282221258 |
| 0.750000000 | 0.750000000 | 0.000000000 |
| 0.915828645 | 0.833240151 | 0.093915731 |
| 0.832638741 | 0.918694377 | 0.188040182 |
| 0.756166160 | 0.754899323 | 0.282255560 |
| 0.515220821 | 0.527658939 | 0.326886535 |
| 0.399887085 | 0.277866244 | 0.362656295 |
| 0.162199944 | 0.338946670 | 0.327165753 |
| 0.356035501 | 0.191846535 | 0.392242134 |

Ce@Ni-Heyrovsky-IS

1.0

|               |              |               |
|---------------|--------------|---------------|
| 10.0322999954 | 0.0000000000 | 0.0000000000  |
| -5.0161499977 | 8.6882266544 | 0.0000000000  |
| 0.0000000000  | 0.0000000000 | 21.1434993744 |

| Ni | Ce | O | H |
|----|----|---|---|
| 63 | 1  | 1 | 3 |

Direct

|             |             |             |
|-------------|-------------|-------------|
| 0.000000000 | 0.000000000 | 0.000000000 |
| 0.166897669 | 0.083495118 | 0.094144322 |
| 0.082672112 | 0.166902721 | 0.188639224 |
| 0.998659015 | 0.998205781 | 0.283970743 |
| 0.250000000 | 0.000000000 | 0.000000000 |
| 0.416723490 | 0.083367415 | 0.094241306 |
| 0.333335251 | 0.168168262 | 0.189568400 |
| 0.249188572 | 0.998199284 | 0.283642620 |
| 0.500000000 | 0.000000000 | 0.000000000 |
| 0.666323900 | 0.083003253 | 0.093958385 |

|             |             |             |
|-------------|-------------|-------------|
| 0.583779335 | 0.167011201 | 0.189004496 |
| 0.500332117 | 0.999935150 | 0.284195542 |
| 0.750000000 | 0.000000000 | 0.000000000 |
| 0.916492879 | 0.083315536 | 0.093811534 |
| 0.833397686 | 0.166525751 | 0.189349383 |
| 0.749079525 | 0.999114037 | 0.283432126 |
| 0.000000000 | 0.250000000 | 0.000000000 |
| 0.167466775 | 0.333676189 | 0.094120905 |
| 0.082742371 | 0.415439218 | 0.188723266 |
| 0.997407138 | 0.248547584 | 0.284509420 |
| 0.250000000 | 0.250000000 | 0.000000000 |
| 0.416924477 | 0.333471417 | 0.094729617 |
| 0.334967822 | 0.417292386 | 0.190719858 |
| 0.245953456 | 0.243925348 | 0.284692794 |
| 0.500000000 | 0.250000000 | 0.000000000 |
| 0.666314721 | 0.333297968 | 0.094049767 |
| 0.582806230 | 0.416902184 | 0.190757796 |
| 0.497927457 | 0.245867908 | 0.283615649 |
| 0.750000060 | 0.250000000 | 0.000000000 |
| 0.916541457 | 0.332852751 | 0.093815036 |
| 0.832916617 | 0.415271431 | 0.188659146 |
| 0.749145508 | 0.249743193 | 0.283391565 |
| 0.000000000 | 0.500000000 | 0.000000000 |
| 0.166859940 | 0.583238423 | 0.094180644 |
| 0.083187588 | 0.666172504 | 0.189433917 |
| 0.998864770 | 0.500424564 | 0.283996135 |
| 0.250000000 | 0.500000000 | 0.000000000 |
| 0.416866392 | 0.583258808 | 0.094780661 |
| 0.333300829 | 0.664780557 | 0.189680874 |
| 0.245617837 | 0.501158714 | 0.284861952 |

|             |             |             |
|-------------|-------------|-------------|
| 0.500000000 | 0.500000000 | 0.000000000 |
| 0.666194260 | 0.582974970 | 0.094663158 |
| 0.582696199 | 0.665260613 | 0.190779969 |
| 0.750000060 | 0.500000000 | 0.000000000 |
| 0.916551292 | 0.583159387 | 0.094092466 |
| 0.831697583 | 0.665655851 | 0.189057484 |
| 0.754952312 | 0.501002908 | 0.283378005 |
| 0.000000000 | 0.750000000 | 0.000000000 |
| 0.166683525 | 0.833338439 | 0.094630994 |
| 0.083018057 | 0.916925609 | 0.189366162 |
| 0.001335102 | 0.750563860 | 0.283747375 |
| 0.249999985 | 0.750000000 | 0.000000000 |
| 0.416594207 | 0.833227813 | 0.094264090 |
| 0.333340883 | 0.916519523 | 0.189513370 |
| 0.249315023 | 0.750626564 | 0.283744782 |
| 0.500000000 | 0.750000000 | 0.000000000 |
| 0.666105986 | 0.832610607 | 0.094068870 |
| 0.583674669 | 0.916321874 | 0.189061806 |
| 0.497724652 | 0.751449466 | 0.283640504 |
| 0.750000000 | 0.750000000 | 0.000000000 |
| 0.916521609 | 0.833250105 | 0.094128989 |
| 0.832543075 | 0.917092025 | 0.188637897 |
| 0.754952848 | 0.753686905 | 0.283283889 |
| 0.504760563 | 0.502498686 | 0.324184388 |
| 0.389274925 | 0.469845265 | 0.438615531 |
| 0.307299972 | 0.495200396 | 0.434145033 |
| 0.340480119 | 0.368517131 | 0.458498180 |
| 0.168681487 | 0.333903879 | 0.326967448 |

1.0

|               |              |               |
|---------------|--------------|---------------|
| 10.0322999954 | 0.0000000000 | 0.0000000000  |
| -5.0161499977 | 8.6882266544 | 0.0000000000  |
| 0.0000000000  | 0.0000000000 | 21.1434993744 |

|    |    |   |   |
|----|----|---|---|
| Ni | Ce | O | H |
| 63 | 1  | 1 | 3 |

Direct

|             |             |             |
|-------------|-------------|-------------|
| 0.000000000 | 0.000000000 | 0.000000000 |
| 0.167779446 | 0.083578698 | 0.094068274 |
| 0.085471064 | 0.167977720 | 0.188828304 |
| 0.001339674 | 0.999997377 | 0.284203112 |
| 0.250000000 | 0.000000000 | 0.000000000 |
| 0.417796791 | 0.083307609 | 0.094373062 |
| 0.335745186 | 0.167984143 | 0.188973203 |
| 0.250986010 | 0.997894526 | 0.283681273 |
| 0.500000000 | 0.000000000 | 0.000000000 |
| 0.667817712 | 0.083054870 | 0.093955755 |
| 0.587019503 | 0.167222202 | 0.188728139 |
| 0.502846122 | 0.999527931 | 0.284212023 |
| 0.750000000 | 0.000000000 | 0.000000000 |
| 0.917891085 | 0.083676971 | 0.093789279 |
| 0.835877895 | 0.167196780 | 0.189252451 |
| 0.751531124 | 0.999585748 | 0.283262670 |
| 0.000000000 | 0.250000000 | 0.000000000 |
| 0.168724671 | 0.334202498 | 0.094592050 |
| 0.086846009 | 0.417015880 | 0.190063253 |
| 0.000000000 | 0.247952983 | 0.283375442 |
| 0.250000000 | 0.250000000 | 0.000000000 |
| 0.417898446 | 0.334051013 | 0.094686709 |
| 0.337238878 | 0.418315291 | 0.193001211 |

|             |             |             |
|-------------|-------------|-------------|
| 0.248432308 | 0.241089210 | 0.282768220 |
| 0.500000000 | 0.250000000 | 0.000000000 |
| 0.668224573 | 0.333748698 | 0.094095528 |
| 0.585036039 | 0.416437715 | 0.190720767 |
| 0.499781758 | 0.242785484 | 0.282834500 |
| 0.750000060 | 0.250000000 | 0.000000000 |
| 0.918336928 | 0.333425999 | 0.093763322 |
| 0.836626112 | 0.416092128 | 0.188725576 |
| 0.751361430 | 0.249446690 | 0.283453852 |
| 0.000000000 | 0.500000000 | 0.000000000 |
| 0.167937279 | 0.583300769 | 0.094648942 |
| 0.085427970 | 0.666549385 | 0.189643994 |
| 0.000820398 | 0.499581605 | 0.284376889 |
| 0.250000000 | 0.500000000 | 0.000000000 |
| 0.417502850 | 0.582773566 | 0.095329925 |
| 0.334602118 | 0.663599968 | 0.190803051 |
| 0.247195914 | 0.498524219 | 0.290023476 |
| 0.500000000 | 0.500000000 | 0.000000000 |
| 0.666998148 | 0.582803428 | 0.094665460 |
| 0.584719300 | 0.664737344 | 0.191157967 |
| 0.750000060 | 0.500000000 | 0.000000000 |
| 0.917795122 | 0.583493829 | 0.094035760 |
| 0.833811224 | 0.665834486 | 0.189025462 |
| 0.758496642 | 0.501225948 | 0.282872170 |
| 0.000000000 | 0.750000000 | 0.000000000 |
| 0.167823285 | 0.833462059 | 0.094593734 |
| 0.085172154 | 0.916808844 | 0.189496204 |
| 0.003413238 | 0.751156747 | 0.283811182 |
| 0.249999985 | 0.750000000 | 0.000000000 |
| 0.417332798 | 0.832655191 | 0.094103634 |

|             |             |             |
|-------------|-------------|-------------|
| 0.335827410 | 0.916134834 | 0.189636469 |
| 0.251863331 | 0.751365244 | 0.283670515 |
| 0.500000000 | 0.750000000 | 0.000000000 |
| 0.667112112 | 0.832175255 | 0.093900651 |
| 0.585627079 | 0.916022897 | 0.188710153 |
| 0.502435684 | 0.753531694 | 0.282796860 |
| 0.750000000 | 0.750000000 | 0.000000000 |
| 0.917652905 | 0.833307326 | 0.094007842 |
| 0.834870756 | 0.917503834 | 0.188388765 |
| 0.758875012 | 0.755207360 | 0.282985300 |
| 0.514226198 | 0.501047254 | 0.329924047 |
| 0.389533192 | 0.486534029 | 0.420083642 |
| 0.280095041 | 0.485766917 | 0.378645033 |
| 0.335698903 | 0.441975176 | 0.459537297 |
| 0.183963209 | 0.476005763 | 0.358680069 |

Ce@Ni-Heyrovsky-FS

1.0

|               |              |               |
|---------------|--------------|---------------|
| 10.0322999954 | 0.0000000000 | 0.0000000000  |
| -5.0161499977 | 8.6882266544 | 0.0000000000  |
| 0.0000000000  | 0.0000000000 | 21.1434993744 |

| Ni | Ce | O | H |
|----|----|---|---|
| 63 | 1  | 1 | 3 |

Direct

|             |             |             |
|-------------|-------------|-------------|
| 0.000000000 | 0.000000000 | 0.000000000 |
| 0.166504487 | 0.083485223 | 0.094046965 |
| 0.082570709 | 0.167398185 | 0.188618481 |
| 0.999078274 | 0.999867618 | 0.284195423 |
| 0.250000000 | 0.000000000 | 0.000000000 |
| 0.416396827 | 0.083489701 | 0.094079554 |

|             |             |             |
|-------------|-------------|-------------|
| 0.333342254 | 0.168127775 | 0.189060390 |
| 0.248867124 | 0.999036014 | 0.283552796 |
| 0.500000000 | 0.000000000 | 0.000000000 |
| 0.666511893 | 0.083494052 | 0.093837321 |
| 0.583575130 | 0.167298585 | 0.188668266 |
| 0.499988973 | 0.999997437 | 0.284098595 |
| 0.750000000 | 0.000000000 | 0.000000000 |
| 0.916413963 | 0.083575711 | 0.093800500 |
| 0.832600892 | 0.166653886 | 0.189233258 |
| 0.748810887 | 0.998981714 | 0.283356398 |
| 0.000000000 | 0.250000000 | 0.000000000 |
| 0.167789549 | 0.334136516 | 0.094375357 |
| 0.083673112 | 0.416141480 | 0.189321250 |
| 0.998069286 | 0.248301029 | 0.283042550 |
| 0.250000000 | 0.250000000 | 0.000000000 |
| 0.416482598 | 0.334255040 | 0.094993748 |
| 0.334528565 | 0.418104142 | 0.192573488 |
| 0.244811878 | 0.243565708 | 0.282987505 |
| 0.500000000 | 0.250000000 | 0.000000000 |
| 0.665894687 | 0.333965629 | 0.094102480 |
| 0.581882477 | 0.417427629 | 0.191388011 |
| 0.496737897 | 0.244546786 | 0.282873839 |
| 0.750000060 | 0.250000000 | 0.000000000 |
| 0.917007267 | 0.333542854 | 0.093953975 |
| 0.832030654 | 0.415267557 | 0.188484162 |
| 0.748531878 | 0.249984369 | 0.283315331 |
| 0.000000000 | 0.500000000 | 0.000000000 |
| 0.166753605 | 0.583314657 | 0.094221637 |
| 0.082863502 | 0.666515172 | 0.189329714 |
| 0.996803641 | 0.499360412 | 0.283342749 |

|             |             |             |
|-------------|-------------|-------------|
| 0.250000000 | 0.500000000 | 0.000000000 |
| 0.416655451 | 0.582900167 | 0.095095128 |
| 0.333193690 | 0.665155947 | 0.189929754 |
| 0.243779793 | 0.501474619 | 0.286216766 |
| 0.500000000 | 0.500000000 | 0.000000000 |
| 0.665892959 | 0.583165944 | 0.094752185 |
| 0.582438350 | 0.665329754 | 0.191379398 |
| 0.750000060 | 0.500000000 | 0.000000000 |
| 0.916383624 | 0.583434105 | 0.094039619 |
| 0.831671715 | 0.666039944 | 0.189051822 |
| 0.753774762 | 0.501569450 | 0.282746106 |
| 0.000000000 | 0.750000000 | 0.000000000 |
| 0.166517690 | 0.833335638 | 0.094479494 |
| 0.082650051 | 0.916856050 | 0.189371258 |
| 0.999842048 | 0.750385880 | 0.283667296 |
| 0.249999985 | 0.750000000 | 0.000000000 |
| 0.416274905 | 0.832710624 | 0.094198026 |
| 0.333180189 | 0.916841388 | 0.189275190 |
| 0.248510137 | 0.751784682 | 0.283336967 |
| 0.500000000 | 0.750000000 | 0.000000000 |
| 0.665768802 | 0.832244575 | 0.094046563 |
| 0.583690286 | 0.916864574 | 0.188609898 |
| 0.498154908 | 0.753027797 | 0.282953918 |
| 0.750000000 | 0.750000000 | 0.000000000 |
| 0.916401625 | 0.833354414 | 0.094054960 |
| 0.832213223 | 0.917102337 | 0.188633665 |
| 0.754601479 | 0.753317058 | 0.282944471 |
| 0.504032075 | 0.499756366 | 0.338402808 |
| 0.501152396 | 0.486037999 | 0.436146438 |
| 0.236224279 | 0.526944578 | 0.399956882 |



0.494144320

0.464821160

0.481206834

0.189888686

0.450801641

0.381306678

## References

- 1 M. Pourbaix, Atlas of electrochemical equilibria in aqueous solutions, *J. Electroanal. Chem.*, 1967, **13**, 471–471.
- 2 A. M. Patel, J. K. Norskov, K. A. Persson and J. H. Montoya, Efficient Pourbaix diagrams of many-element compounds, *Phys Chem Chem Phys*, 2019, **21**, 25323–25327.
- 3 G. Kresse and J. Furthmüller, Efficiency of ab-initio total energy calculations for metals and semiconductors using a plane-wave basis set, *Comput. Mater. Sci.*, 1996, **6**, 15–50.
- 4 G. Kresse and J. Furthmüller, Efficient iterative schemes for ab initio total-energy calculations using a plane-wave basis set, *Phys. Rev. B*, 1996, **54**, 11169–11186.
- 5 G. Kresse and J. Hafner, Ab initio molecular dynamics for liquid metals, *Phys. Rev. B*, 1993, **47**, 558–561.
- 6 J. Hafner, Ab-initio simulations of materials using VASP: Density-functional theory and beyond, *J. Comput. Chem.*, 2008, **29**, 2044–2078.
- 7 G. Kresse and D. Joubert, From ultrasoft pseudopotentials to the projector augmented-wave method, *Phys. Rev. B*, 1999, **59**, 1758–1775.
- 8 P. E. Blöchl, Projector augmented-wave method, *Phys. Rev. B*, 1994, **50**, 17953–17979.
- 9 B. Hammer, L. B. Hansen and J. K. Nørskov, Improved adsorption energetics within density-functional theory using revised perdew-burke-ernzerhof functionals, *Phys. Rev. B*, 1999, **59**, 7413–7421.
- 10 J. P. Perdew, K. Burke and M. Ernzerhof, Generalized Gradient Approximation Made Simple [Phys. Rev. Lett. 77, 3865 (1996)], *Phys. Rev. Lett.*, 1997, **78**, 1396–1396.
- 11 J. P. Perdew, K. Burke and M. Ernzerhof, Generalized Gradient Approximation Made Simple, *Phys. Rev. Lett.*, 1996, **77**, 3865–3868.
- 12 H. J. Monkhorst and J. D. Pack, Special points for Brillouin-zone integrations, *Phys. Rev. B*, 1976, **13**, 5188–5192.
- 13 L. Bengtsson, Dipole correction for surface supercell calculations, *Phys. Rev. B*, 1999, **59**, 12301–12304.
- 14 G. Henkelman, B. P. Uberuaga and H. Jónsson, A climbing image nudged elastic band method for finding saddle points and minimum energy paths, *J. Chem. Phys.*, 2000, **113**, 9901–9904.
- 15 S. Grimme, J. Antony, S. Ehrlich and H. Krieg, A consistent and accurate ab initio parametrization of density functional dispersion correction (DFT-D) for the 94 elements H-Pu, *J. Chem. Phys.*, 2010, **132**, 154104.
- 16 S. Grimme, S. Ehrlich and L. Goerigk, Effect of the damping function in dispersion corrected density functional theory, *J. Comput. Chem.*, 2011, **32**, 1456–1465.
- 17 K. Reuter and M. Scheffler, Composition, structure, and stability of RuO<sub>2</sub>(110) as a function of oxygen pressure, *Phys. Rev. B*, 2001, **65**, 035406.
- 18 Y. Zheng, Y. Jiao, Y. Zhu, L. H. Li, Y. Han, Y. Chen, M. Jaroniec and S.-Z. Qiao,

- High Electrocatalytic Hydrogen Evolution Activity of an Anomalous Ruthenium Catalyst, *J. Am. Chem. Soc.*, 2016, **138**, 16174–16181.
- 19 J. K. Nørskov, T. Bligaard, A. Logadottir, J. R. Kitchin, J. G. Chen, S. Pandelov and U. Stimming, Trends in the Exchange Current for Hydrogen Evolution, *J. Electrochem. Soc.*, 2005, **152**, J23.
- 20 Z. Liu, P. B. Balbuena and P. P. Mukherjee, Hole Polaron Diffusion in the Final Discharge Product of Lithium–Sulfur Batteries, *J. Phys. Chem. C*, 2017, **121**, 17169–17175.
- 21 V. Wang, N. Xu, J.-C. Liu, G. Tang and W.-T. Geng, VASPKIT: A user-friendly interface facilitating high-throughput computing and analysis using VASP code, *Comput. Phys. Commun.*, 2021, **267**, 108033.
- 22 W. Yi, G. Tang, X. Chen, B. Yang and X. Liu, qvasp: A flexible toolkit for VASP users in materials simulations, *Comput. Phys. Commun.*, 2020, **257**, 107535.
